# Supplementary material for: Erythrocyte invasion-neutralising antibodies prevent Plasmodium falciparum RH5 from binding to basigin-containing membrane protein complexes
Source: eLife. 2023 Oct 5;12:e83681. doi: 10.7554/eLife.83681 (PMC10569788; doi:10.7554/eLife.83681)
Supplement: Figure 1—source data 1. [file elife-83681-fig1-data1.xlsx]

## Sheet: Figure 1a
left-hand panel									right-hand panel
Time	0	10000	1000	100	10	1	0.1		Conc R5.016 (nM)	Response (RU)
-60.16	-0.720897	-0.456076	-0.392589	-0.375875	-0.314855	-0.252305	0.46652		0	0
-59.16	-0.712303	-0.438522	-0.372276	-0.352829	-0.314404	-0.241001	0.437865		0.1	22.48
-58.16	-0.664055	-0.422837	-0.355278	-0.332871	-0.302471	-0.226109	0.410285		1	65.3
-57.16	-0.638164	-0.393455	-0.341106	-0.325706	-0.278509	-0.201341	0.413487		10	85.71
-56.16	-0.603245	-0.388986	-0.327611	-0.29548	-0.26903	-0.191123	0.389617		100	94.6
-55.16	-0.569646	-0.391917	-0.323369	-0.288584	-0.275897	-0.188683	0.371477		1000	97.14
-54.16	-0.547435	-0.36428	-0.304271	-0.278586	-0.261633	-0.181993	0.337638		10000	98.12
-53.16	-0.541991	-0.358029	-0.291808	-0.273557	-0.270629	-0.193296	0.325366
-52.16	-0.53831	-0.366293	-0.293681	-0.288779	-0.27918	-0.197434	0.328343
-51.16	-0.541143	-0.342966	-0.283025	-0.290476	-0.269976	-0.219932	0.316736
-50.16	-0.517967	-0.336228	-0.273278	-0.298508	-0.25874	-0.211705	0.324273
-49.16	-0.512359	-0.334654	-0.254363	-0.277952	-0.240386	-0.202147	0.310772
-48.16	-0.484014	-0.315012	-0.243901	-0.278513	-0.220782	-0.191307	0.287214
-47.16	-0.458373	-0.313169	-0.230956	-0.266539	-0.213989	-0.179259	0.284249
-46.16	-0.429265	-0.3119	-0.208379	-0.257457	-0.19826	-0.158592	0.277988
-45.16	-0.410125	-0.309447	-0.195831	-0.223753	-0.193756	-0.154052	0.291172
-44.16	-0.367577	-0.288194	-0.179589	-0.198228	-0.184521	-0.132421	0.296127
-43.16	-0.348736	-0.289451	-0.160625	-0.17794	-0.170965	-0.148729	0.298686
-42.16	-0.335192	-0.258092	-0.137377	-0.161107	-0.152246	-0.144725	0.29846
-41.16	-0.32857	-0.24088	-0.13106	-0.15714	-0.14544	-0.12733	0.281267
-40.16	-0.321038	-0.242723	-0.121636	-0.150804	-0.13023	-0.129613	0.256177
-39.16	-0.317486	-0.23275	-0.113384	-0.147056	-0.127813	-0.130235	0.247318
-38.16	-0.315435	-0.220164	-0.108221	-0.14619	-0.115619	-0.123803	0.23183
-37.16	-0.308831	-0.204942	-0.121148	-0.147385	-0.0975763	-0.123814	0.215203
-36.16	-0.306121	-0.190123	-0.128264	-0.152098	-0.114166	-0.113768	0.203716
-35.16	-0.301921	-0.182944	-0.140361	-0.148459	-0.10938	-0.122117	0.198261
-34.16	-0.300817	-0.182749	-0.150304	-0.165415	-0.125353	-0.148582	0.186096
-33.16	-0.298052	-0.183445	-0.149004	-0.177829	-0.126702	-0.161692	0.170518
-32.16	-0.291332	-0.181663	-0.150829	-0.185875	-0.143652	-0.167162	0.163183
-31.16	-0.263091	-0.180052	-0.143462	-0.188048	-0.136016	-0.166564	0.161455
-30.16	-0.228765	-0.167796	-0.130865	-0.185252	-0.123431	-0.14486	0.156031
-29.16	-0.19779	-0.163036	-0.111303	-0.167186	-0.107592	-0.127099	0.142097
-28.16	-0.199316	-0.14326	-0.103368	-0.155223	-0.0870236	-0.118493	0.112628
-27.16	-0.168145	-0.13933	-0.0820245	-0.13878	-0.075726	-0.10465	0.101224
-26.16	-0.128374	-0.109226	-0.0500661	-0.116856	-0.0781184	-0.10078	0.0812995
-25.16	-0.120098	-0.104942	-0.0398978	-0.111046	-0.0678768	-0.098009	0.069511
-24.16	-0.0985219	-0.105308	-0.0431631	-0.103233	-0.062353	-0.10631	0.0688084
-23.16	-0.0865532	-0.0967514	-0.0571342	-0.0832626	-0.0632504	-0.102318	0.0638696
-22.16	-0.0802173	-0.0896338	-0.0609302	-0.0793799	-0.0593805	-0.0921734	0.0606795
-21.16	-0.0913258	-0.0921364	-0.0700245	-0.0986061	-0.0797663	-0.110667	0.060804
-20.16	-0.086986	-0.100058	-0.0871691	-0.0971898	-0.0987298	-0.110582	0.0549019
-19.16	-0.0886892	-0.118907	-0.0982717	-0.1067	-0.112994	-0.127647	0.0531492
-18.16	-0.086602	-0.11223	-0.0997245	-0.0886703	-0.123883	-0.133824	0.0756596
-17.16	-0.0687125	-0.111302	-0.0919669	-0.0896955	-0.105249	-0.111217	0.0607753
-16.16	-0.074957	-0.114941	-0.102484	-0.0584833	-0.0788145	-0.10476	0.0535324
-15.16	-0.0665463	-0.0982416	-0.0878476	-0.0301874	-0.0491271	-0.0898555	0.0740241
-14.16	-0.0311764	-0.0699821	-0.0724361	-0.03507	-0.0224852	-0.0658685	0.0573544
-13.16	-0.00675	-0.0598862	-0.0374504	-0.0132553	-0.0240353	-0.0435413	0.038641
-12.16	-0.000451	-0.0308097	-0.0213863	-0.0201285	-0.0249143	-0.0235955	0.024634
-11.16	0.0111519	-0.00724	-0.0082	-0.0231064	-0.0139706	-0.0027	0.0175778
-10.16	0.0103399	0.00878	0.00698	-0.0149037	-0.00377	0.00681	0.0143491
-9.15997	0.0160289	0.0138084	0.0259777	-0.00206	0.000965	0.0174821	0.00634
-8.15997	0.00391	0.0289931	0.0294807	-0.00287	-0.00372	0.024171	-0.012773
-7.15997	-0.00611	0.0431412	0.0429024	0.0178726	0.017255	0.0265881	-0.0156088
-6.15997	0.00884	0.0501606	0.0418039	0.0342915	0.0226872	0.0218886	-0.00287
-5.15997	0.0338377	0.0676753	0.0531858	0.0357539	0.0211913	0.0217648	0.0011
-4.15997	0.0758661	0.101927	0.0737298	0.0567614	0.0403439	0.0476675	0.0124442
-3.15997	0.11759	0.129405	0.133825	0.0759994	0.0735348	0.088158	-0.0265938
-2.15997	0.142751	0.14097	0.164052	0.0270177	0.0299936	0.0550686	0.0683999
-1.15997	0.341045	0.600486	0.388835	0.58657	0.722891	0.94803	0.878818
-0.159973	-0.5419	-12.5347	-5.49414	-6.34332	-7.61873	-7.2007	-15.131
0.840027	3.78533	8.57816	3.48204	7.1951	7.01801	6.92987	5.24257
1.84003	8.8174	2.67795	1.29543	0.538241	0.327004	0.171991	7.7135
2.84003	15.0957	4.73212	2.40372	1.26868	0.763033	0.486944	10.7331
3.84003	19.7359	6.36407	3.37918	1.781	1.00209	0.623696	13.054
4.84003	23.2169	7.7323	4.19751	2.25721	1.25195	0.770266	14.8644
5.84003	25.9011	8.78744	4.9073	2.66635	1.42783	0.884144	16.3341
6.84003	28.0769	9.70913	5.47999	2.95205	1.61326	0.991078	17.5673
7.84003	29.7798	10.4309	5.93877	3.20982	1.75314	1.05189	18.5664
8.84003	31.2271	11.0839	6.40005	3.4478	1.86378	1.10917	19.3906
9.84003	32.3586	11.6196	6.73938	3.62915	1.95465	1.14337	20.1181
10.84	33.3147	12.106	7.02079	3.79451	2.05193	1.20181	20.7308
11.84	34.1916	12.5398	7.30892	3.96782	2.1421	1.25223	21.2478
12.84	34.8915	12.8634	7.53008	4.09923	2.19749	1.28471	21.7068
13.84	35.5228	13.1555	7.742	4.21552	2.25165	1.32379	22.0735
14.84	36.088	13.4308	7.96822	4.32047	2.31823	1.36268	22.3832
15.84	36.5503	13.7017	8.16923	4.43124	2.35157	1.40929	22.7094
16.84	36.9555	13.9229	8.33071	4.55125	2.40179	1.44069	22.9854
17.84	37.3609	14.072	8.44846	4.63129	2.46933	1.47211	23.2186
18.84	37.6818	14.2617	8.58307	4.7182	2.53131	1.49335	23.4444
19.84	38.0577	14.459	8.73468	4.80804	2.59021	1.53247	23.6826
20.84	38.4113	14.6508	8.84659	4.9115	2.6716	1.56781	23.893
21.84	38.6968	14.8244	8.97542	4.99027	2.72839	1.58809	24.1115
22.84	38.9678	14.9902	9.06315	5.05288	2.75336	1.58623	24.3167
23.84	39.2322	15.1283	9.15788	5.10934	2.78132	1.60063	24.4778
24.84	39.4651	15.2711	9.26317	5.15408	2.8147	1.61388	24.604
25.84	39.6821	15.418	9.36384	5.21443	2.83107	1.63485	24.7464
26.84	39.9141	15.5153	9.46558	5.26788	2.83887	1.638	24.9009
27.84	40.1579	15.6223	9.55888	5.30447	2.85535	1.66277	25.0527
28.84	40.3292	15.7409	9.63848	5.35593	2.87509	1.67415	25.2179
29.84	40.4836	15.8581	9.72944	5.38528	2.89335	1.68682	25.3558
30.84	40.6963	15.964	9.79004	5.43677	2.92749	1.70978	25.4704
31.84	40.8486	16.0668	9.85095	5.49401	2.96544	1.73984	25.5891
32.84	41.0432	16.1884	9.93104	5.55189	3.01357	1.76846	25.6954
33.84	41.2331	16.307	9.99953	5.60337	3.0534	1.78499	25.7791
34.84	41.3754	16.3946	10.0507	5.65221	3.07341	1.78239	25.8869
35.84	41.5273	16.4928	10.1371	5.68474	3.09437	1.7822	26.0487
36.84	41.6771	16.5624	10.2052	5.72979	3.09999	1.78922	26.1581
37.84	41.83	16.6537	10.2666	5.76054	3.09918	1.77595	26.2292
38.84	41.9812	16.6989	10.3101	5.7683	3.09706	1.75992	26.2915
39.84	42.1256	16.7858	10.376	5.81287	3.12302	1.77722	26.3486
40.84	42.2082	16.8526	10.4178	5.84031	3.15951	1.77351	26.4131
41.84	42.3165	16.8944	10.4571	5.8548	3.16284	1.77454	26.508
42.84	42.4519	16.9578	10.5097	5.8736	3.19284	1.77924	26.6319
43.84	42.5727	17.0396	10.5715	5.92065	3.20398	1.81683	26.7263
44.84	42.7202	17.0943	10.628	5.97107	3.22427	1.83258	26.8034
45.84	42.8457	17.1883	10.6718	5.99432	3.22763	1.8476	26.8795
46.84	42.9524	17.2858	10.7114	6.03319	3.24781	1.86075	26.976
47.84	43.0781	17.3829	10.7929	6.09059	3.28371	1.86758	27.0703
48.84	43.1954	17.4348	10.8362	6.13495	3.31552	1.86115	27.1555
49.84	43.2944	17.5151	10.8815	6.17773	3.33939	1.88104	27.2278
50.84	43.3756	17.6031	10.9577	6.22321	3.36588	1.89838	27.2655
51.84	43.4391	17.6638	11.0148	6.24447	3.38285	1.91686	27.3488
52.84	43.525	17.735	11.0518	6.25547	3.39025	1.93727	27.404
53.84	43.6714	17.8075	11.0913	6.27601	3.40547	1.94106	27.4583
54.84	43.78	17.8743	11.1305	6.31473	3.42288	1.94886	27.5281
55.84	43.87	17.9268	11.1692	6.35229	3.44467	1.97711	27.5934
56.84	43.9818	17.9925	11.209	6.38179	3.4645	1.97933	27.6627
57.84	44.0821	18.0541	11.2684	6.42424	3.48921	2.00107	27.7156
58.84	44.1602	18.1232	11.3098	6.47371	3.51796	2.01248	27.7931
59.84	44.2527	18.1965	11.3557	6.5025	3.52957	2.03107	27.856
60.84	44.3381	18.2452	11.4154	6.53162	3.53275	2.03491	27.9325
61.84	44.4109	18.275	11.4573	6.55133	3.53775	2.04083	27.9943
62.84	44.4927	18.317	11.498	6.58752	3.547	2.0567	28.0238
63.84	44.589	18.3542	11.5503	6.61687	3.56645	2.05936	28.066
64.84	44.6641	18.3873	11.5859	6.64149	3.57961	2.06295	28.1265
65.84	44.7396	18.4249	11.6188	6.65626	3.58647	2.0541	28.1701
66.84	44.8177	18.4869	11.65	6.6656	3.60518	2.05911	28.2325
67.84	44.9123	18.5237	11.6856	6.69108	3.62377	2.0497	28.2724
68.84	44.9853	18.5729	11.6997	6.71917	3.64363	2.06583	28.3055
69.84	45.019	18.6104	11.7126	6.73474	3.67886	2.0838	28.3631
70.84	45.0957	18.6701	11.7659	6.78361	3.71362	2.10536	28.415
71.84	45.1367	18.7179	11.7955	6.80868	3.71696	2.127	28.4613
72.84	45.1991	18.7736	11.8396	6.83431	3.74552	2.14965	28.5181
73.84	45.2482	18.8353	11.8709	6.8632	3.74166	2.1512	28.5519
74.84	45.3127	18.8937	11.9161	6.88248	3.76351	2.14717	28.5812
75.84	45.3739	18.9225	11.9624	6.90371	3.77561	2.16606	28.6207
76.84	45.4361	18.9465	12.0099	6.92445	3.80638	2.16042	28.6942
77.84	45.5081	18.9818	12.0459	6.96173	3.814	2.17371	28.733
78.84	45.5601	19.0051	12.0784	6.97479	3.82681	2.18146	28.7878
79.84	45.6212	19.0459	12.1001	7.00939	3.82441	2.18455	28.8311
80.84	45.6567	19.0877	12.118	7.03123	3.83453	2.1927	28.875
81.84	45.6835	19.1153	12.1361	7.03384	3.82987	2.19805	28.9377
82.84	45.7235	19.1509	12.1684	7.05151	3.85126	2.21887	28.9824
83.84	45.77	19.1971	12.1907	7.07854	3.88063	2.2385	29.0192
84.84	45.86	19.263	12.2266	7.11313	3.92562	2.28151	29.0347
85.84	45.9252	19.3212	12.2609	7.1557	3.93979	2.30182	29.0449
86.84	45.9857	19.3744	12.2899	7.18552	3.95171	2.32356	29.0698
87.84	46.0431	19.4172	12.3195	7.22037	3.9558	2.32545	29.1134
88.84	46.1032	19.4448	12.3242	7.22978	3.96345	2.32639	29.1516
89.84	46.1526	19.4799	12.3575	7.25394	3.96664	2.3285	29.1996
90.84	46.2015	19.5109	12.376	7.27157	3.98142	2.33641	29.2522
91.84	46.2132	19.5342	12.4146	7.29325	3.99447	2.33906	29.277
92.84	46.2312	19.5724	12.4326	7.30343	3.99552	2.34648	29.3127
93.84	46.2603	19.6103	12.4648	7.30964	4.00276	2.35623	29.3512
94.84	46.2922	19.6347	12.4687	7.34277	4.01041	2.35138	29.3769
95.84	46.3425	19.6635	12.4998	7.36844	4.02575	2.35017	29.4024
96.84	46.4113	19.7012	12.5273	7.37714	4.0394	2.35736	29.4295
97.84	46.4687	19.7463	12.5537	7.40068	4.04435	2.36332	29.4563
98.84	46.5008	19.7627	12.5779	7.42377	4.04526	2.36658	29.48
99.84	46.528	19.8059	12.6134	7.42094	4.05166	2.3824	29.5076
100.84	46.5598	19.8331	12.6348	7.44491	4.0662	2.40721	29.5431
101.84	46.5908	19.8649	12.6779	7.46147	4.07972	2.42313	29.5663
102.84	46.6506	19.9065	12.7211	7.49894	4.1014	2.43477	29.6104
103.84	46.6636	19.9431	12.7552	7.51044	4.12286	2.43555	29.6373
104.84	46.6827	19.9642	12.7759	7.52219	4.12716	2.42073	29.6709
105.84	46.7201	19.9908	12.7973	7.52222	4.1337	2.42981	29.6741
106.84	46.74	20.0137	12.7989	7.5306	4.13795	2.43846	29.6785
107.84	46.798	20.0369	12.7998	7.53552	4.14362	2.44336	29.6899
108.84	46.8401	20.049	12.8193	7.55341	4.1358	2.46301	29.6766
109.84	46.8741	20.0562	12.8105	7.5684	4.14242	2.46595	29.7061
110.84	46.9183	20.0859	12.8135	7.60165	4.15647	2.47509	29.7401
111.84	46.957	20.1095	12.8361	7.61985	4.17446	2.46992	29.7627
112.84	46.9681	20.1451	12.8422	7.63543	4.19652	2.45908	29.7794
113.84	46.9856	20.1571	12.8351	7.64755	4.20185	2.44591	29.8016
114.84	46.9991	20.1917	12.8496	7.65468	4.20726	2.449	29.8347
115.84	47.0364	20.2196	12.8671	7.66113	4.21671	2.44592	29.861
116.84	47.0718	20.2615	12.879	7.69365	4.21232	2.46018	29.8889
117.84	47.117	20.2811	12.8774	7.71492	4.20134	2.47061	29.9134
118.84	47.165	20.3263	12.8926	7.71279	4.20429	2.47576	29.9163
119.84	47.2149	20.3497	12.9129	7.74128	4.22383	2.48513	29.9225
120.84	47.265	20.3795	12.9257	7.7491	4.25081	2.5032	29.9467
121.84	47.302	20.3844	12.9381	7.74628	4.24838	2.52954	29.9911
122.84	47.3376	20.414	12.9652	7.76405	4.27635	2.53927	30.0343
123.84	47.3596	20.4514	13.0039	7.78983	4.28643	2.56068	30.0609
124.84	47.3795	20.4691	13.0153	7.79784	4.28312	2.57084	30.0669
125.84	47.4013	20.5003	13.034	7.81483	4.28417	2.57638	30.0738
126.84	47.43	20.5361	13.0709	7.84094	4.29248	2.57465	30.1033
127.84	47.469	20.5572	13.1134	7.84843	4.29424	2.56392	30.124
128.84	47.4977	20.566	13.1496	7.86069	4.30071	2.55629	30.1728
129.84	47.5152	20.578	13.1678	7.87931	4.32067	2.55995	30.2064
130.84	47.5556	20.588	13.1816	7.89281	4.32975	2.55234	30.2122
131.84	47.5676	20.5999	13.1955	7.91876	4.35269	2.56744	30.2413
132.84	47.5954	20.6345	13.2031	7.96674	4.36996	2.56354	30.282
133.84	47.6064	20.6565	13.2043	7.96909	4.39898	2.57399	30.2823
134.84	47.6138	20.6734	13.2318	7.97627	4.40621	2.57742	30.2927
135.84	47.6276	20.7012	13.2376	7.98097	4.40926	2.58132	30.295
136.84	47.6568	20.7474	13.2648	7.99918	4.4168	2.59639	30.2999
137.84	47.6849	20.7767	13.2992	8.01906	4.41915	2.61093	30.2977
138.84	47.7083	20.8161	13.3124	8.03689	4.41431	2.63231	30.3389
139.84	47.7211	20.8557	13.3249	8.0489	4.42067	2.6318	30.3529
140.84	47.7324	20.8661	13.3401	8.04043	4.43201	2.6339	30.3964
141.84	47.7371	20.8935	13.3693	8.04766	4.44163	2.64146	30.427
142.84	47.7322	20.9215	13.3727	8.0466	4.44956	2.64782	30.4393
143.84	47.7277	20.9289	13.3945	8.05209	4.43973	2.64189	30.442
144.84	47.7516	20.9629	13.417	8.07627	4.45864	2.63899	30.4386
145.84	47.7753	20.9719	13.4273	8.08334	4.45798	2.63213	30.4432
146.84	47.8127	21.0012	13.4487	8.10846	4.4617	2.64093	30.4513
147.84	47.8296	21.0245	13.46	8.11671	4.46859	2.63009	30.4572
148.84	47.8441	21.0275	13.4811	8.12957	4.48106	2.6204	30.478
149.84	47.8416	21.0243	13.4937	8.14404	4.47855	2.60846	30.4939
150.84	47.8552	21.0269	13.5008	8.15668	4.49945	2.60303	30.4952
151.84	47.8942	21.0575	13.5351	8.17411	4.54089	2.61635	30.5081
152.84	47.9058	21.0808	13.5562	8.19257	4.55667	2.63141	30.5228
153.84	47.9521	21.1102	13.5948	8.21191	4.58701	2.66467	30.5299
154.84	47.9811	21.1455	13.6121	8.25079	4.60638	2.67786	30.5429
155.84	48.0109	21.1823	13.6232	8.2664	4.60815	2.69703	30.5697
156.84	48.0282	21.1947	13.6328	8.26699	4.594	2.71398	30.5916
157.84	48.0696	21.217	13.653	8.28403	4.59802	2.72828	30.6082
158.84	48.0985	21.214	13.6604	8.30286	4.5979	2.7157	30.6188
159.84	48.1121	21.2147	13.6737	8.30678	4.60164	2.73324	30.5989
160.84	48.1249	21.2288	13.6954	8.30472	4.60726	2.73744	30.6052
161.84	48.1426	21.2659	13.7244	8.33052	4.62194	2.7546	30.6074
162.84	48.1655	21.2893	13.7551	8.3637	4.64595	2.76267	30.6099
163.84	48.1755	21.2991	13.791	8.39457	4.67706	2.77717	30.6287
164.84	48.1675	21.3328	13.8033	8.40404	4.69499	2.77952	30.6474
165.84	48.1666	21.3555	13.8138	8.42321	4.71647	2.78605	30.6572
166.84	48.1775	21.3581	13.825	8.43043	4.73375	2.78225	30.6744
167.84	48.1997	21.3923	13.8419	8.43816	4.73414	2.767	30.7063
168.84	48.2295	21.4135	13.8418	8.43711	4.72512	2.75837	30.7198
169.84	48.2713	21.4481	13.8842	8.45846	4.71573	2.7592	30.7446
170.84	48.3303	21.4896	13.9382	8.45424	4.70552	2.75668	30.7743
171.84	48.3288	21.52	13.9416	8.46195	4.68417	2.73006	30.767
172.84	48.3222	21.5341	13.9413	8.46432	4.67457	2.7257	30.7725
173.84	48.3256	21.5461	13.9664	8.48025	4.67289	2.73217	30.7789
174.84	48.3309	21.542	13.9807	8.5216	4.6653	2.73588	30.769
175.84	48.3195	21.5523	13.9846	8.54655	4.67434	2.73634	30.7622
176.84	48.3105	21.534	13.9806	8.56431	4.68173	2.73463	30.7561
177.84	48.3131	21.5245	14.004	8.5942	4.70335	2.73302	30.2789
178.84	47.7692	20.5053	13.4949	7.56322	3.21904	0.715493	32.3477
179.84	47.3953	31.6592	20.8068	12.9073	11.189	8.40448	34.1438
180.84	47.0945	13.7615	8.10625	4.30863	-0.275106	-1.01547	28.0926
181.84	46.0163	20.7267	13.6685	8.44547	4.66084	2.79107	27.8358
182.84	46.1018	19.0069	12.4527	7.58824	4.03701	2.25109	26.2895
183.84	40.9762	18.2471	11.9087	7.38566	3.91998	2.26668	24.8955
184.84	39.009	17.3796	11.3643	7.04319	3.75949	2.22481	23.6395
185.84	37.203	16.6549	10.9025	6.79087	3.64297	2.14583	22.5896
186.84	35.7322	15.9741	10.4225	6.55926	3.50252	2.06046	21.6133
187.84	34.3538	15.327	10.0309	6.34185	3.4048	16.9764	20.7751
188.84	33.1218	14.8333	9.7135	6.14551	3.29926	1.92749	19.9687
189.84	32.0458	14.3665	9.41713	5.95866	3.21801	1.86897	19.3219
190.84	31.0776	13.9473	9.13883	5.78578	3.1212	1.81192	18.712
191.84	30.2636	13.5944	8.8916	5.64214	3.05772	1.76768	18.2068
192.84	29.5445	13.2905	8.68079	5.51637	3.00063	1.72976	17.7051
193.84	28.8345	12.9748	8.50233	5.39204	2.94332	1.69522	17.2684
194.84	28.1995	12.6953	8.34048	5.29254	2.88553	1.65595	16.8452
195.84	27.6373	12.4584	8.18414	5.2022	2.85136	1.64445	16.4824
196.84	27.1337	12.2637	8.05642	5.13608	2.82214	1.62446	16.1283
197.84	26.6837	12.0611	7.93475	5.06635	2.77075	1.62152	15.8305
198.84	26.25	11.8612	7.7965	4.9976	2.72231	1.5934	15.5728
199.84	25.806	11.6701	7.69432	4.94558	2.69581	1.57756	15.3137
200.84	25.4708	11.5109	7.59553	4.87587	2.65023	1.56082	15.0549
201.84	25.107	11.3462	7.50192	4.82056	2.6058	1.54248	14.817
202.84	24.7416	11.1906	7.39627	4.75696	2.56717	1.51892	14.5835
203.84	24.4219	11.051	7.31482	4.71289	2.52692	1.49725	14.3774
204.84	24.1232	10.9216	7.2431	4.65643	2.48792	1.47943	14.1619
205.84	23.848	10.8055	7.15772	4.59656	2.45758	1.46838	13.9687
206.84	23.5653	10.698	7.05746	4.54454	2.4416	1.46152	13.8
207.84	23.3196	10.6087	6.97875	4.51554	2.41976	1.45704	13.6049
208.84	23.0854	10.5204	6.92684	4.50101	2.40533	1.44587	13.4449
209.84	22.8489	10.4161	6.85677	4.47233	2.40258	1.43739	13.2687
210.84	22.5804	10.317	6.77736	4.42892	2.39158	1.41729	13.1193
211.84	22.3682	10.2251	6.7339	4.41501	2.38537	1.42396	12.9653
212.84	22.1609	10.1323	6.68677	4.4043	2.36646	1.40674	12.8052
213.84	21.9231	10.0537	6.61705	4.35032	2.33853	1.40004	12.6648
214.84	21.6943	9.95929	6.55057	4.30969	2.32498	1.37823	12.5305
215.84	21.5101	9.88611	6.5199	4.27063	2.30554	1.37543	12.3981
216.84	21.3487	9.8122	6.47611	4.23425	2.28433	1.36432	12.2513
217.84	21.1554	9.71539	6.41165	4.18659	2.24918	1.3338	12.1181
218.84	20.9459	9.63904	6.35071	4.14117	2.2348	1.32776	12.0001
219.84	20.7764	9.57706	6.30855	4.13462	2.22766	1.3202	11.8823
220.84	20.5926	9.49632	6.26537	4.10654	2.21939	1.31019	11.7638
221.84	20.4246	9.41537	6.2068	4.09402	2.20884	1.29961	11.643
222.84	20.2584	9.34991	6.15176	4.08124	2.1976	1.29504	11.5527
223.84	20.1162	9.25986	6.12886	4.07603	2.19671	1.29909	11.4451
224.84	19.9639	9.1778	6.08585	4.04791	2.1882	1.27918	11.3385
225.84	19.7791	9.10938	6.04993	4.01849	2.17395	1.2785	11.2411
226.84	19.626	9.05789	6.01597	3.9866	2.16047	1.27135	11.1545
227.84	19.4634	8.98185	5.97286	3.9531	2.15533	1.26649	11.0409
228.84	19.3447	8.93485	5.94368	3.91734	2.148	1.25026	10.9477
229.84	19.1872	8.87522	5.88964	3.87723	2.12094	1.22969	10.8196
230.84	19.0447	8.8236	5.84841	3.84722	2.102	1.21372	10.7217
231.84	18.9058	8.77838	5.79773	3.82971	2.11066	1.21252	10.6187
232.84	18.7762	8.73579	5.75956	3.81477	2.09825	1.21566	10.5192
233.84	18.6216	8.65689	5.70762	3.78829	2.07056	1.20134	10.4298
234.84	18.5104	8.59863	5.66016	3.76941	2.06372	1.2157	10.3377
235.84	18.3907	8.55449	5.64861	3.75896	2.08311	1.21647	10.2454
236.84	18.2704	8.51665	5.62444	3.74218	2.08037	1.21183	10.133
237.84	18.149	8.46747	5.59766	3.72614	2.06366	1.21362	10.0574
238.84	18.0292	8.4361	5.55664	3.72882	2.05945	1.20905	9.98018
239.84	17.8923	8.39974	5.52751	3.7073	2.04468	1.1964	9.90719
240.84	17.7816	8.36753	5.51186	3.69816	2.05065	1.20643	9.83802
241.84	17.6522	8.33471	5.48715	3.69298	2.03956	1.2045	9.76224
242.84	17.5286	8.29805	5.4679	3.6775	2.03029	1.22048	9.67373
243.84	17.4211	8.25812	5.44858	3.67511	2.02213	1.22095	9.57619
244.84	17.285	8.19938	5.42852	3.6511	2.00356	1.21296	9.48482
245.84	17.1807	8.16738	5.40938	3.64675	1.99137	1.20269	9.40889
246.84	17.0813	8.10093	5.37673	3.62565	1.98687	1.18898	9.34913
247.84	16.9617	8.04135	5.32084	3.60671	1.97327	1.18462	9.2818
248.84	16.8644	7.98385	5.30043	3.60043	1.96696	1.16887	9.21409
249.84	16.7785	7.93993	5.26888	3.59752	1.95796	1.17216	9.14448
250.84	16.6783	7.89382	5.23826	3.58773	1.93812	1.16942	9.0812
251.84	16.5917	7.84707	5.20271	3.57327	1.92661	1.16014	9.00705
252.84	16.5074	7.82014	5.18174	3.56721	1.93138	1.17355	8.92078
253.84	16.4231	7.7807	5.16934	3.53943	1.92416	1.17517	8.85252
254.84	16.3339	7.75057	5.15938	3.53707	1.92899	1.19109	8.77215
255.84	16.2184	7.71924	5.14316	3.53857	1.92862	1.19214	8.68585
256.84	16.1335	7.66168	5.13059	3.51874	1.93698	1.18036	8.61314
257.84	16.0355	7.62057	5.09926	3.48715	1.91032	1.15947	8.54076
258.84	15.915	7.57087	5.06867	3.45851	1.89418	1.13717	8.49176
259.84	15.8244	7.53803	5.05783	3.48505	1.89175	1.15186	8.42603
260.84	15.7252	7.5166	5.03088	3.47766	1.88837	1.15082	8.35227
261.84	15.6156	7.47567	5.00319	3.46133	1.87705	1.15557	8.30955
262.84	15.5455	7.45828	4.99138	3.45913	1.8761	1.16942	8.25276
263.84	15.4945	7.44001	4.99906	3.48665	1.8759	1.2015	8.175
264.84	15.4087	7.41117	4.97444	3.47227	1.87182	1.20564	8.11907
265.84	15.3217	7.37714	4.95898	3.44019	1.87665	1.21765	8.06118
266.84	15.234	7.35132	4.9404	3.40759	1.8732	1.2135	7.99725
267.84	15.1553	7.31082	4.92158	3.39608	1.85941	1.19268	7.94349
268.84	15.0789	7.26556	4.89389	3.37195	1.85318	1.18274	7.86801
269.84	14.9914	7.22743	4.85758	3.3556	1.84777	1.17721	7.80234
270.84	14.916	7.18832	4.82905	3.34353	1.82737	1.15435	7.73664
271.84	14.8209	7.14501	4.80233	3.32836	1.79359	1.13334	7.67461
272.84	14.7379	7.11891	4.77164	3.32063	1.78258	1.12387	7.60144
273.84	14.6643	7.09036	4.75895	3.30837	1.76868	1.12053	7.55653
274.84	14.588	7.07377	4.75771	3.29966	1.75433	1.12483	7.5161
275.84	14.5344	7.04971	4.75996	3.30654	1.76224	1.12462	7.45199
276.84	14.4771	7.04114	4.75809	3.30377	1.78275	1.12921	7.39643
277.84	14.4149	7.01936	4.74946	3.28859	1.78859	1.12655	7.35437
278.84	14.3397	6.99033	4.7156	3.26859	1.77874	1.11122	7.30554
279.84	14.2687	6.96069	4.69159	3.25067	1.76978	1.11371	7.25555
280.84	14.1875	6.92088	4.67272	3.23692	1.76974	1.10859	7.2126
281.84	14.1057	6.89402	4.64141	3.21995	1.75485	1.09779	7.16013
282.84	14.0653	6.87322	4.63223	3.22606	1.75801	1.10068	7.11451
283.84	13.9903	6.83463	4.60335	3.20939	1.74291	1.1045	7.05939
284.84	13.917	6.78222	4.5801	3.20159	1.74031	1.10136	6.98891
285.84	13.8454	6.7422	4.55958	3.18757	1.74904	1.10122	6.91752
286.84	13.7683	6.72191	4.55053	3.17791	1.73161	1.10276	6.86418
287.84	13.6887	6.69782	4.54004	3.18897	1.73724	1.10236	6.80441
288.84	13.6161	6.67857	4.51943	3.17789	1.74047	1.0915	6.76412
289.84	13.5515	6.6652	4.51534	3.15275	1.72717	1.08503	6.71961
290.84	13.4865	6.6424	4.50971	3.14954	1.7121	1.08051	6.69532
291.84	13.4178	6.61067	4.48752	3.12922	1.68914	1.0613	6.65491
292.84	13.3563	6.57991	4.45917	3.11677	1.68349	1.04928	6.61012
293.84	13.2958	6.54827	4.44793	3.09484	1.68419	1.04343	6.55985
294.84	13.2252	6.50958	4.40936	3.07727	1.66882	1.01801	6.49907
295.84	13.1604	6.47603	4.38236	3.06953	1.65721	1.02474	6.45799
296.84	13.1177	6.44934	4.36868	3.07593	1.6561	1.02606	6.4231
297.84	13.0583	6.43275	4.35074	3.05055	1.65209	1.02383	6.37967
298.84	13.0042	6.40973	4.35559	3.06378	1.65112	1.03125	6.32874
299.84	12.9495	6.38547	4.3337	3.05088	1.63415	1.03657	6.29494
300.84	12.8983	6.36044	4.31947	3.04562	1.62907	1.03838	6.25558
301.84	12.8195	6.33097	4.28997	3.02091	1.6271	1.02137	6.21367
302.84	12.7566	6.30526	4.29124	3.01791	1.63154	1.02233	6.16038
303.84	12.7075	6.27364	4.27256	3.00936	1.63117	1.02513	6.12109
304.84	12.6601	6.25486	4.2611	3.00889	1.6354	1.03676	6.08483
305.84	12.6196	6.24454	4.26192	3.01969	1.63696	1.04701	6.05677
306.84	12.5793	6.23519	4.27202	3.01998	1.64283	1.05736	6.00438
307.84	12.5367	6.21171	4.26848	3.02408	1.63021	1.06276	5.96092
308.84	12.4816	6.19895	4.25289	3.01627	1.62945	1.0417	5.90801
309.84	12.4113	6.1695	4.21799	2.995	1.62796	1.03143	5.85214
310.84	12.36	6.15026	4.19143	2.9973	1.62117	1.0131	5.818
311.84	12.3166	6.14075	4.17105	2.98578	1.6265	1.00031	5.77531
312.84	12.2579	6.11159	4.14002	2.96473	1.61867	0.981287	5.72989
313.84	12.217	6.0838	4.13202	2.95465	1.61212	0.982484	5.69661
314.84	12.1608	6.04581	4.12462	2.94993	1.595	0.966382	5.65718
315.84	12.11	6.01267	4.11956	2.94645	1.58523	0.955884	5.62519
316.84	12.0504	6.00796	4.11882	2.91738	1.57624	0.94994	5.58035
317.84	11.9968	5.97336	4.11299	2.89854	1.55999	0.943128	5.54517
318.84	11.9499	5.95806	4.10354	2.90117	1.558	0.950598	5.50324
319.84	11.9064	5.95125	4.09919	2.89009	1.57222	0.949243	5.47463
320.84	11.8592	5.94316	4.09759	2.87181	1.57194	0.944129	5.46075
321.84	11.8255	5.92977	4.08043	2.87875	1.58082	0.962024	5.4194
322.84	11.77	5.92174	4.07409	2.87029	1.5706	0.941809	5.38353
323.84	11.7202	5.90349	4.0418	2.8684	1.57286	0.936316	5.34064
324.84	11.6881	5.8976	4.02766	2.86348	1.57717	0.937647	5.31246
325.84	11.6394	5.86615	4.00369	2.85846	1.57047	0.933899	5.27727
326.84	11.6023	5.84457	4.00444	2.86147	1.56599	0.944446	5.25387
327.84	11.5738	5.82983	3.99542	2.87482	1.57751	0.930115	5.23637
328.84	11.5388	5.79993	3.99564	2.88532	1.57016	0.936096	5.19872
329.84	11.4941	5.7941	4.00014	2.89109	1.57366	0.925184	5.16566
330.84	11.458	5.78075	3.98245	2.87969	1.57197	0.923621	5.13038
331.84	11.3975	5.76305	3.9793	2.87487	1.57817	0.912146	5.08544
332.84	11.3577	5.74981	3.96057	2.86284	1.57585	0.907386	5.03883
333.84	11.3008	5.72391	3.94933	2.8386	1.55685	0.902356	5.00415
334.84	11.2669	5.71926	3.9398	2.83737	1.5561	0.909656	4.96661
335.84	11.2306	5.69181	3.92961	2.81687	1.54977	0.919568	4.93343
336.84	11.1867	5.68132	3.9302	2.80919	1.54066	0.926733	4.91744
337.84	11.1517	5.67533	3.933	2.82108	1.54565	0.945447	4.89645
338.84	11.1203	5.66222	3.9302	2.8272	1.5431	0.951453	4.87726
339.84	11.0793	5.64928	3.9287	2.82799	1.54039	0.964392	4.85665
340.84	11.0495	5.63547	3.93178	2.82267	1.54272	0.956434	4.84319
341.84	11.0201	5.61619	3.91405	2.82883	1.53445	0.97389	4.825
342.84	10.9912	5.59673	3.90267	2.83245	1.53492	0.970434	4.80308
343.84	10.9673	5.59836	3.91982	2.82597	1.5393	0.978651	4.76762
344.84	10.9238	5.57493	3.90401	2.79923	1.52477	0.964307	4.73748
345.84	10.9002	5.56587	3.8856	2.79182	1.51464	0.957239	4.70256
346.84	10.865	5.55438	3.88229	2.80219	1.53665	0.96582	4.67295
347.84	10.8227	5.5526	3.91082	2.80187	1.53148	0.953589	4.63697
348.84	10.7811	5.54462	3.9035	2.81165	1.52625	0.947693	4.61317
349.84	10.7396	5.5436	3.90504	2.81057	1.54355	0.962329	4.57058
350.84	10.7076	5.53368	3.89214	2.81694	1.54203	0.97489	4.54472
351.84	10.6884	5.5233	3.90106	2.82927	1.54094	0.971473	4.50865
352.84	10.6409	5.51791	3.89421	2.83016	1.55732	0.978869	4.48991
353.84	10.6339	5.50535	3.86724	2.8267	1.55581	0.979322	4.45395
354.84	10.5918	5.47141	3.83333	2.79764	1.56225	0.974012	4.41848
355.84	10.5596	5.44943	3.82112	2.79836	1.56296	0.965686	4.39279
356.84	10.5193	5.44114	3.81014	2.77994	1.57299	0.942823	4.37253
357.84	10.4781	5.41139	3.78831	2.75679	1.55236	0.922816	4.3433
358.84	10.4108	5.37167	3.75239	2.7203	1.53062	0.886097	4.31313
359.84	10.3759	5.34109	3.72691	2.69631	1.5257	0.859608	4.28957
360.84	10.331	5.29492	3.70972	2.67194	1.50201	0.81482	4.26183
361.84	10.3081	5.25606	3.69413	2.64876	1.4868	0.799586	4.23152
362.84	10.2694	5.23414	3.68088	2.63008	1.46385	0.795129	4.19471
363.84	10.2575	5.22462	3.69044	2.63649	1.45998	0.802088	4.17515
364.84	10.2382	5.20227	3.69229	2.62976	1.45016	0.801026	4.13546
365.84	10.1831	5.17837	3.66646	2.60385	1.42557	0.796314	4.11863
366.84	10.1486	5.17035	3.68118	2.60687	1.44138	0.82373	4.10566
367.84	10.129	5.16389	3.69117	2.60273	1.43508	0.825769	4.08115
368.84	10.1111	5.16541	3.70038	2.60883	1.44489	0.842651	4.07882
369.84	10.0881	5.1772	3.69224	2.61213	1.4525	0.856042	4.04966
370.84	10.0778	5.17415	3.69239	2.6205	1.46193	0.864222	4.02698
371.84	10.0596	5.15375	3.68018	2.62061	1.48138	0.87616	3.98535
372.84	10.0414	5.16471	3.68148	2.63908	1.47528	0.885328	3.95288
373.84	10.0104	5.14158	3.67034	2.6312	1.47231	0.884046	3.93056
374.84	9.98749	5.12245	3.64863	2.62654	1.46083	0.88125	3.91542
375.84	9.94811	5.11107	3.63934	2.61834	1.46904	0.869605	3.88748
376.84	9.91125	5.09099	3.63006	2.61644	1.4713	0.874182	3.85974
377.84	9.88712	5.09077	3.63883	2.62721	1.48101	0.876489	3.84479
378.84	9.86277	5.07411	3.63212	2.62037	1.49047	0.882593	3.82198
379.84	9.83826	5.06726	3.62903	2.62714	1.48676	0.88025	3.79661
380.84	9.79501	5.05267	3.5936	2.60858	1.47934	0.871705	3.76671
381.84	9.76431	5.04296	3.58413	2.5924	1.48127	0.863868	3.74201
382.84	9.72263	5.03296	3.57242	2.58106	1.47086	0.851868	3.73027
383.84	9.69058	5.02612	3.56174	2.5708	1.47525	0.8573	3.71133
384.84	9.65336	5.04481	3.58127	2.57307	1.48406	0.857934	3.71493
385.84	9.63163	5.03798	3.58219	2.58302	1.49749	0.862146	3.7113
386.84	9.61691	5.05981	3.60696	2.59473	1.51974	0.873596	3.70177
387.84	9.60112	5.05355	3.61412	2.608	1.52692	0.8875	3.68347
388.84	9.58007	5.0521	3.61852	2.61045	1.52084	0.88667	3.66411
389.84	9.56695	5.05168	3.60113	2.60961	1.52379	0.892859	3.65793
390.84	9.55867	5.064	3.61434	2.60233	1.54418	0.906079	3.62496
391.84	9.54197	5.04305	3.59868	2.5975	1.53394	0.919727	3.61043
392.84	9.51302	5.02677	3.5909	2.5825	1.52453	0.917798	3.57804
393.84	9.50157	5.01304	3.58104	2.58109	1.51431	0.935559	3.5661
394.84	9.48589	5.00242	3.58879	2.5842	1.52902	0.931531	3.54891
395.84	9.45975	4.9837	3.58054	2.59247	1.52353	0.924073	3.53075
396.84	9.43225	4.9646	3.56219	2.60077	1.50403	0.916504	3.49641
397.84	9.41922	4.95374	3.56308	2.60852	1.49411	0.901734	3.48136
398.84	9.38928	4.93427	3.5445	2.59766	1.49109	0.893067	3.4571
399.84	9.34897	4.93091	3.54794	2.57635	1.47055	0.889587	3.42672
400.84	9.32181	4.93317	3.5419	2.55945	1.46353	0.89087	3.40164
401.84	9.29315	4.91461	3.52307	2.54761	1.45007	0.892762	3.37335
402.84	9.26617	4.90752	3.51977	2.53734	1.4636	0.895117	3.36373
403.84	9.24971	4.91709	3.51436	2.54343	1.48516	0.908032	3.35357
404.84	9.21951	4.90557	3.522	2.54821	1.48451	0.910804	3.33273
405.84	9.18613	4.87042	3.5101	2.55261	1.48538	0.88733	3.31036
406.84	9.15139	4.84429	3.48312	2.55077	1.49586	0.86582	3.29686
407.84	9.12783	4.83188	3.49086	2.55857	1.49951	0.864942	3.28345
408.84	9.10457	4.83657	3.477	2.54495	1.4943	0.869739	3.2538
409.84	9.08076	4.82686	3.46796	2.54146	1.49404	0.845728	3.22908
410.84	9.03384	4.79711	3.44375	2.52343	1.49434	0.830298	3.2026
411.84	9.01224	4.8042	3.43973	2.52661	1.49063	0.842408	3.1863
412.84	8.99039	4.80438	3.43118	2.51898	1.48392	0.838501	3.16618
413.84	8.96882	4.8025	3.44086	2.5171	1.47994	0.840724	3.1411
414.84	8.92323	4.78579	3.42299	2.50393	1.46659	0.827137	3.12765
415.84	8.90747	4.78925	3.43024	2.49756	1.45959	0.83899	3.11437
416.84	8.89072	4.79114	3.42923	2.508	1.47055	0.844421	3.09358
417.84	8.88025	4.77618	3.44055	2.51654	1.47321	0.855103	3.08373
418.84	8.86873	4.77065	3.44069	2.53378	1.49186	0.861866	3.07998
419.84	8.85486	4.76526	3.44293	2.54431	1.48914	0.855407

## Sheet: Figure 1c
PMCA						Basigin
Integrated density data						Integrated density data
Undepleted	PMCA depleted	PMCA and MCT1 depleted				Undepleted	PMCA depleted	PMCA and MCT1 depleted
1.8	1.5	1.3				5	6.3		2.9
0.002	0.08	0.36				3.57	4.9		1.86
0.001	0.002	0.008				0.312	1.41		0.09
MCT1						GPC
Integrated density data						Integrated density data
Undepleted	PMCA depleted	PMCA and MCT1 depleted				Undepleted	PMCA depleted	PMCA and MCT1 depleted
3.2	3.8	1.46				2.6	3.6	1.6
2.98	3.5	1.21				2.68	3.58	1.48
0.01	0.05	0.09				2.49	3.68	1.2

## Sheet: Figure 1d
Anti-Basigin
Basigin	PMCA4	PMCA1	MCT1	MCT2	MCT4	NPTN
12955643	8061900	1146480	1590410	201538	28066	0
Anti-NPTN
Basigin	PMCA4	PMCA1	MCT1	MCT2	MCT4	NPTN
0	51167	4496	0	0	0	53683
