# Supplementary material for: Erythrocyte invasion-neutralising antibodies prevent Plasmodium falciparum RH5 from binding to basigin-containing membrane protein complexes
Source: eLife. 2023 Oct 5;12:e83681. doi: 10.7554/eLife.83681 (PMC10569788; doi:10.7554/eLife.83681)
Supplement: Figure 2—source data 1. [file elife-83681-fig2-data1.xlsx]

## Sheet: Figure 2b
Volume(ml)	UV(mAU)
-0.007401	0.074528
-0.006569	0.099565
-0.005738	0.10119
-0.004906	0.101411
-0.004074	0.10183
-0.003242	0.102231
-0.00241	0.102036
-0.001579	0.102499
-0.000747	0.103429
8.5e-05	0.104558
0.000917	0.105115
0.001749	0.105222
0.002581	0.105925
0.003412	0.105856
0.004244	0.106795
0.005076	0.107569
0.005908	0.108081
0.00674	0.108409
0.007572	0.108751
0.008403	0.109474
0.009235	0.109376
0.010067	0.109816
0.010899	0.110527
0.011731	0.111129
0.012562	0.111901
0.013394	0.111959
0.014226	0.111935
0.015058	0.112319
0.01589	0.112672
0.016722	0.111995
0.017553	0.111092
0.018385	0.11062
0.019217	0.109444
0.020049	0.109399
0.020881	0.108346
0.021713	0.108493
0.022544	0.109274
0.023376	0.109925
0.024208	0.111553
0.02504	0.111409
0.025872	0.111649
0.026704	0.112061
0.027535	0.112565
0.028367	0.111633
0.029199	0.111012
0.030031	0.109505
0.030863	0.108604
0.031694	0.106924
0.032526	0.105222
0.033358	0.104103
0.03419	0.10263
0.035022	0.100584
0.035854	0.099821
0.036685	0.09879
0.037517	0.097793
0.038349	0.097115
0.039181	0.098642
0.040013	0.101676
0.040845	0.103685
0.041676	0.106452
0.042508	0.109555
0.04334	0.111572
0.044172	0.112752
0.045004	0.115068
0.045835	0.116756
0.046667	0.119471
0.047499	0.122901
0.048331	0.126397
0.049163	0.12907
0.049995	0.131509
0.050826	0.133643
0.051658	0.135467
0.05249	0.137516
0.053322	0.141296
0.054154	0.143211
0.054986	0.145177
0.055817	0.146132
0.056649	0.146896
0.057481	0.14711
0.058313	0.148208
0.059145	0.149272
0.059976	0.150127
0.060808	0.151409
0.06164	0.152365
0.062472	0.15339
0.063304	0.153905
0.064136	0.153858
0.064967	0.154787
0.065799	0.153477
0.066631	0.154472
0.067463	0.154395
0.068295	0.156538
0.069127	0.156706
0.069958	0.157629
0.07079	0.160464
0.071622	0.163564
0.072454	0.165837
0.073286	0.166291
0.074118	0.167704
0.074949	0.170472
0.075781	0.173591
0.076613	0.178017
0.077445	0.183195
0.078277	0.186696
0.079108	0.18926
0.07994	0.191495
0.080772	0.192091
0.081604	0.190465
0.082436	0.189118
0.083268	0.187171
0.084099	0.185672
0.084931	0.185215
0.085763	0.186009
0.086595	0.186338
0.087427	0.188476
0.088259	0.190045
0.08909	0.188473
0.089922	0.187161
0.090754	0.186855
0.091586	0.186217
0.092418	0.188244
0.093249	0.190381
0.094081	0.191226
0.094913	0.191142
0.095745	0.191987
0.096577	0.19366
0.097409	0.196476
0.09824	0.199862
0.099072	0.204299
0.099904	0.207197
0.100736	0.210482
0.101568	0.213136
0.1024	0.216549
0.103231	0.220666
0.104063	0.224766
0.104895	0.228584
0.105727	0.23411
0.106559	0.239734
0.10739	0.246728
0.108222	0.254117
0.109054	0.260747
0.109886	0.265958
0.110718	0.27181
0.11155	0.279363
0.112381	0.285447
0.113213	0.29201
0.114045	0.300174
0.114877	0.311115
0.115709	0.323065
0.116541	0.334646
0.117372	0.345536
0.118204	0.3553
0.119036	0.364735
0.119868	0.376198
0.1207	0.389568
0.121532	0.404682
0.122363	0.421159
0.123195	0.437478
0.124027	0.455783
0.124859	0.475934
0.125691	0.495853
0.126522	0.515956
0.127354	0.536513
0.128186	0.557457
0.129018	0.577018
0.12985	0.596365
0.130682	0.6193
0.131513	0.642736
0.132345	0.666844
0.133177	0.691261
0.134009	0.713881
0.134841	0.737083
0.135673	0.759439
0.136504	0.781268
0.137336	0.804243
0.138168	0.827453
0.139	0.849285
0.139832	0.870292
0.140663	0.891083
0.141495	0.913298
0.142327	0.934276
0.143159	0.957675
0.143991	0.978606
0.144823	0.998667
0.145654	1.01859
0.146486	1.03855
0.147318	1.05624
0.14815	1.07411
0.148982	1.09161
0.149814	1.10836
0.150645	1.12448
0.151477	1.14112
0.152309	1.1578
0.153141	1.17348
0.153973	1.18874
0.154804	1.20253
0.155636	1.21539
0.156468	1.22742
0.1573	1.23649
0.158132	1.24467
0.158964	1.2528
0.159795	1.2617
0.160627	1.27001
0.161459	1.27719
0.162291	1.28354
0.163123	1.28799
0.163955	1.29123
0.164786	1.29453
0.165618	1.29676
0.16645	1.29523
0.167282	1.2947
0.168114	1.29384
0.168946	1.29121
0.169777	1.28845
0.170609	1.28392
0.171441	1.27918
0.172273	1.27298
0.173105	1.26672
0.173936	1.25984
0.174768	1.25324
0.1756	1.24577
0.176432	1.23768
0.177264	1.23046
0.178096	1.22249
0.178927	1.21518
0.179759	1.20655
0.180591	1.19886
0.181423	1.19125
0.182255	1.18373
0.183087	1.17546
0.183918	1.16836
0.18475	1.1609
0.185582	1.15324
0.186414	1.14513
0.187246	1.13746
0.188077	1.12913
0.188909	1.12112
0.189741	1.11291
0.190573	1.10429
0.191405	1.0968
0.192237	1.09026
0.193068	1.08201
0.1939	1.07421
0.194732	1.06639
0.195564	1.05785
0.196396	1.05054
0.197228	1.04301
0.198059	1.03427
0.198891	1.0265
0.199723	1.01896
0.200555	1.01258
0.201387	1.00537
0.202218	0.997662
0.20305	0.990533
0.203882	0.98288
0.204714	0.975631
0.205546	0.968374
0.206378	0.960838
0.207209	0.952514
0.208041	0.946564
0.208873	0.938711
0.209705	0.932468
0.210537	0.926232
0.211369	0.92025
0.2122	0.914395
0.213032	0.90796
0.213864	0.901507
0.214696	0.894711
0.215528	0.888228
0.216359	0.880572
0.217191	0.874456
0.218023	0.868
0.218855	0.861077
0.219687	0.854956
0.220519	0.848327
0.22135	0.841931
0.222182	0.835643
0.223014	0.829861
0.223846	0.823535
0.224678	0.817335
0.22551	0.810439
0.226341	0.803421
0.227173	0.796757
0.228005	0.790345
0.228837	0.783923
0.229669	0.778164
0.230501	0.771999
0.231332	0.765976
0.232164	0.76063
0.232996	0.754458
0.233828	0.748463
0.23466	0.742835
0.235491	0.736746
0.236323	0.731109
0.237155	0.725661
0.237987	0.720391
0.238819	0.714501
0.239651	0.708962
0.240482	0.704767
0.241314	0.699691
0.242146	0.694241
0.242978	0.688791
0.24381	0.68423
0.244642	0.678809
0.245473	0.673806
0.246305	0.669641
0.247137	0.664861
0.247969	0.659612
0.248801	0.654969
0.249632	0.649797
0.250464	0.645184
0.251296	0.639736
0.252128	0.635069
0.25296	0.629512
0.253792	0.624332
0.254623	0.619692
0.255455	0.615202
0.256287	0.610809
0.257119	0.605289
0.257951	0.601546
0.258783	0.59603
0.259614	0.591313
0.260446	0.587184
0.261278	0.583125
0.26211	0.578747
0.262942	0.575232
0.263774	0.57202
0.264605	0.568337
0.265437	0.564232
0.266269	0.560399
0.267101	0.557012
0.267933	0.553095
0.268764	0.548728
0.269596	0.544695
0.270428	0.540721
0.27126	0.537515
0.272092	0.534868
0.272924	0.53118
0.273755	0.527209
0.274587	0.523356
0.275419	0.519556
0.276251	0.516645
0.277083	0.514504
0.277915	0.512011
0.278746	0.509441
0.279578	0.506255
0.28041	0.503193
0.281242	0.500523
0.282074	0.497176
0.282905	0.494393
0.283737	0.491781
0.284569	0.489256
0.285401	0.486456
0.286233	0.484355
0.287065	0.482105
0.287896	0.479071
0.288728	0.476988
0.28956	0.474837
0.290392	0.472273
0.291224	0.469664
0.292056	0.466107
0.292887	0.462762
0.293719	0.459735
0.294551	0.457901
0.295383	0.456048
0.296215	0.45343
0.297047	0.450752
0.297878	0.447788
0.29871	0.445621
0.299542	0.443263
0.300374	0.441367
0.301206	0.439404
0.302037	0.43681
0.302869	0.434938
0.303701	0.432944
0.304533	0.430939
0.305365	0.42888
0.306197	0.426302
0.307028	0.424233
0.30786	0.421671
0.308692	0.419081
0.309524	0.417251
0.310356	0.415583
0.311188	0.413926
0.312019	0.411955
0.312851	0.408739
0.313683	0.405752
0.314515	0.404579
0.315347	0.403135
0.316178	0.401641
0.31701	0.400516
0.317842	0.39885
0.318674	0.396371
0.319506	0.393916
0.320338	0.39189
0.321169	0.38971
0.322001	0.387812
0.322833	0.385821
0.323665	0.383719
0.324497	0.381622
0.325329	0.379764
0.32616	0.377854
0.326992	0.375871
0.327824	0.373614
0.328656	0.371366
0.329488	0.36975
0.330319	0.367372
0.331151	0.364976
0.331983	0.363479
0.332815	0.362355
0.333647	0.361519
0.334479	0.361035
0.33531	0.359851
0.336142	0.35858
0.336974	0.357733
0.337806	0.356579
0.338638	0.355659
0.33947	0.354977
0.340301	0.353919
0.341133	0.352593
0.341965	0.351331
0.342797	0.350317
0.343629	0.349298
0.34446	0.347813
0.345292	0.346537
0.346124	0.344999
0.346956	0.343287
0.347788	0.342554
0.34862	0.341843
0.349451	0.341053
0.350283	0.34004
0.351115	0.338429
0.351947	0.336616
0.352779	0.335272
0.353611	0.334223
0.354442	0.333656
0.355274	0.332889
0.356106	0.33128
0.356938	0.330093
0.35777	0.329276
0.358602	0.327603
0.359433	0.325985
0.360265	0.324753
0.361097	0.322943
0.361929	0.321096
0.362761	0.320121
0.363592	0.319599
0.364424	0.318934
0.365256	0.318346
0.366088	0.316844
0.36692	0.314389
0.367752	0.312758
0.368583	0.311604
0.369415	0.310757
0.370247	0.309809
0.371079	0.308322
0.371911	0.30684
0.372743	0.305938
0.373574	0.305181
0.374406	0.302933
0.375238	0.302042
0.37607	0.300877
0.376902	0.29976
0.377733	0.298961
0.378565	0.296938
0.379397	0.295162
0.380229	0.29367
0.381061	0.291651
0.381893	0.290105
0.382724	0.289397
0.383556	0.288315
0.384388	0.286715
0.38522	0.285988
0.386052	0.285418
0.386884	0.284471
0.387715	0.283134
0.388547	0.282577
0.389379	0.281274
0.390211	0.279947
0.391043	0.278818
0.391874	0.277976
0.392706	0.277165
0.393538	0.277029
0.39437	0.276833
0.395202	0.275809
0.396034	0.274397
0.396865	0.273022
0.397697	0.272536
0.398529	0.271192
0.399361	0.26986
0.400193	0.269315
0.401025	0.268649
0.401856	0.267818
0.402688	0.267201
0.40352	0.265817
0.404352	0.26466
0.405184	0.263416
0.406016	0.262374
0.406847	0.261572
0.407679	0.260269
0.408511	0.260063
0.409343	0.260138
0.410175	0.25922
0.411006	0.258408
0.411838	0.257316
0.41267	0.256726
0.413502	0.256301
0.414334	0.255473
0.415166	0.254902
0.415997	0.254736
0.416829	0.253036
0.417661	0.251302
0.418493	0.249898
0.419325	0.248151
0.420157	0.246873
0.420988	0.246662
0.42182	0.246931
0.422652	0.246672
0.423484	0.245692
0.424316	0.244334
0.425147	0.243521
0.425979	0.243949
0.426811	0.243341
0.427643	0.242501
0.428475	0.241184
0.429307	0.240331
0.430138	0.23908
0.43097	0.237501
0.431802	0.237368
0.432634	0.23623
0.433466	0.234822
0.434298	0.233933
0.435129	0.232147
0.435961	0.230691
0.436793	0.228576
0.437625	0.227598
0.438457	0.226839
0.439288	0.226199
0.44012	0.225512
0.440952	0.224681
0.441784	0.223628
0.442616	0.222591
0.443448	0.22199
0.444279	0.221534
0.445111	0.222112
0.445943	0.222426
0.446775	0.220971
0.447607	0.21969
0.448439	0.218597
0.44927	0.218472
0.450102	0.218299
0.450934	0.217914
0.451766	0.217766
0.452598	0.217081
0.45343	0.2165
0.454261	0.215931
0.455093	0.214998
0.455925	0.213667
0.456757	0.212486
0.457589	0.211328
0.45842	0.211302
0.459252	0.210912
0.460084	0.209834
0.460916	0.208786
0.461748	0.207961
0.46258	0.20724
0.463411	0.205639
0.464243	0.204522
0.465075	0.204324
0.465907	0.203619
0.466739	0.202564
0.467571	0.200644
0.468402	0.198941
0.469234	0.197573
0.470066	0.196924
0.470898	0.196937
0.47173	0.196813
0.472561	0.196207
0.473393	0.195472
0.474225	0.194554
0.475057	0.193312
0.475889	0.192327
0.476721	0.19195
0.477552	0.191994
0.478384	0.193084
0.479216	0.193466
0.480048	0.193121
0.48088	0.192667
0.481712	0.191722
0.482543	0.191021
0.483375	0.19037
0.484207	0.189135
0.485039	0.187878
0.485871	0.187245
0.486703	0.185906
0.487534	0.184759
0.488366	0.184792
0.489198	0.184599
0.49003	0.1842
0.490862	0.183585
0.491693	0.183136
0.492525	0.181618
0.493357	0.181024
0.494189	0.179911
0.495021	0.179132
0.495853	0.178504
0.496684	0.178559
0.497516	0.179477
0.498348	0.179678
0.49918	0.179361
0.500012	0.178566
0.500844	0.178915
0.501675	0.179032
0.502507	0.179412
0.503339	0.180076
0.504171	0.180113
0.505003	0.179614
0.505834	0.179551
0.506666	0.178737
0.507498	0.178551
0.50833	0.1775
0.509162	0.176797
0.509994	0.177425
0.510825	0.177922
0.511657	0.177622
0.512489	0.176652
0.513321	0.175759
0.514153	0.174929
0.514985	0.174354
0.515816	0.174165
0.516648	0.175227
0.51748	0.175233
0.518312	0.175157
0.519144	0.174407
0.519975	0.173532
0.520807	0.172875
0.521639	0.172997
0.522471	0.172682
0.523303	0.172242
0.524135	0.171583
0.524966	0.171405
0.525798	0.171759
0.52663	0.172014
0.527462	0.171747
0.528294	0.171649
0.529126	0.17085
0.529957	0.169818
0.530789	0.168478
0.531621	0.168002
0.532453	0.16776
0.533285	0.16699
0.534117	0.166852
0.534948	0.165054
0.53578	0.164789
0.536612	0.165348
0.537444	0.1651
0.538276	0.164367
0.539107	0.163147
0.539939	0.161496
0.540771	0.161165
0.541603	0.160075
0.542435	0.158659
0.543267	0.158346
0.544098	0.158216
0.54493	0.157347
0.545762	0.155945
0.546594	0.154703
0.547426	0.154151
0.548258	0.154503
0.549089	0.15368
0.549921	0.153957
0.550753	0.154544
0.551585	0.153742
0.552417	0.153146
0.553248	0.153396
0.55408	0.154127
0.554912	0.154297
0.555744	0.154804
0.556576	0.154194
0.557408	0.154068
0.558239	0.152995
0.559071	0.153095
0.559903	0.153099
0.560735	0.15316
0.561567	0.152644
0.562399	0.152881
0.56323	0.151852
0.564062	0.151188
0.564894	0.150944
0.565726	0.151874
0.566558	0.150289
0.567389	0.149438
0.568221	0.149375
0.569053	0.149732
0.569885	0.148394
0.570717	0.148199
0.571549	0.14822
0.57238	0.149814
0.573212	0.149038
0.574044	0.148081
0.574876	0.148824
0.575708	0.148721
0.57654	0.149571
0.577371	0.149202
0.578203	0.147685
0.579035	0.146956
0.579867	0.145888
0.580699	0.144757
0.581531	0.144167
0.582362	0.143908
0.583194	0.145647
0.584026	0.145792
0.584858	0.144435
0.58569	0.143225
0.586521	0.143361
0.587353	0.143751
0.588185	0.144429
0.589017	0.144149
0.589849	0.144479
0.590681	0.144142
0.591512	0.143569
0.592344	0.14299
0.593176	0.14257
0.594008	0.142057
0.59484	0.141458
0.595672	0.140405
0.596503	0.13928
0.597335	0.137717
0.598167	0.138153
0.598999	0.138272
0.599831	0.138072
0.600662	0.13705
0.601494	0.135963
0.602326	0.134359
0.603158	0.133699
0.60399	0.132928
0.604822	0.13255
0.605653	0.131979
0.606485	0.131819
0.607317	0.130891
0.608149	0.131436
0.608981	0.131711
0.609813	0.130849
0.610644	0.129549
0.611476	0.130261
0.612308	0.130593
0.61314	0.129925
0.613972	0.128124
0.614803	0.127971
0.615635	0.128144
0.616467	0.127127
0.617299	0.126694
0.618131	0.12604
0.618963	0.125312
0.619794	0.125616
0.620626	0.12604
0.621458	0.126481
0.62229	0.127479
0.623122	0.12855
0.623954	0.129592
0.624785	0.12803
0.625617	0.127222
0.626449	0.127861
0.627281	0.127731
0.628113	0.126766
0.628945	0.126163
0.629776	0.125791
0.630608	0.12607
0.63144	0.12575
0.632272	0.124714
0.633104	0.125537
0.633935	0.125065
0.634767	0.124254
0.635599	0.12429
0.636431	0.123715
0.637263	0.123438
0.638095	0.123513
0.638926	0.123982
0.639758	0.123314
0.64059	0.122077
0.641422	0.121405
0.642254	0.12119
0.643086	0.120923
0.643917	0.121045
0.644749	0.121039
0.645581	0.120154
0.646413	0.120133
0.647245	0.120402
0.648076	0.120472
0.648908	0.120572
0.64974	0.120467
0.650572	0.119699
0.651404	0.119629
0.652236	0.119502
0.653067	0.118323
0.653899	0.117178
0.654731	0.116989
0.655563	0.118079
0.656395	0.117447
0.657227	0.11685
0.658058	0.116577
0.65889	0.115746
0.659722	0.115535
0.660554	0.115606
0.661386	0.115626
0.662217	0.115111
0.663049	0.114763
0.663881	0.114614
0.664713	0.113985
0.665545	0.112647
0.666377	0.112139
0.667208	0.112554
0.66804	0.112103
0.668872	0.112369
0.669704	0.112005
0.670536	0.112404
0.671368	0.112036
0.672199	0.112168
0.673031	0.111199
0.673863	0.111855
0.674695	0.110889
0.675527	0.11073
0.676359	0.110679
0.67719	0.110386
0.678022	0.109816
0.678854	0.10963
0.679686	0.109372
0.680518	0.108931
0.681349	0.108069
0.682181	0.108151
0.683013	0.108172
0.683845	0.108256
0.684677	0.108329
0.685509	0.10851
0.68634	0.108019
0.687172	0.108369
0.688004	0.108231
0.688836	0.106511
0.689668	0.105621
0.690499	0.104543
0.691331	0.103458
0.692163	0.103584
0.692995	0.103649
0.693827	0.103199
0.694659	0.102714
0.69549	0.102634
0.696322	0.103176
0.697154	0.10251
0.697986	0.102314
0.698818	0.102113
0.69965	0.101596
0.700481	0.102185
0.701313	0.102715
0.702145	0.102344
0.702977	0.101733
0.703809	0.101143
0.704641	0.100664
0.705472	0.100252
0.706304	0.100217
0.707136	0.100285
0.707968	0.100494
0.7088	0.100349
0.709632	0.100285
0.710463	0.100286
0.711295	0.100112
0.712127	0.099526
0.712959	0.099475
0.713791	0.09966
0.714622	0.099691
0.715454	0.099216
0.716286	0.099338
0.717118	0.098853
0.71795	0.098611
0.718782	0.098331
0.719613	0.098846
0.720445	0.098577
0.721277	0.098172
0.722109	0.098503
0.722941	0.098883
0.723772	0.098623
0.724604	0.097491
0.725436	0.096435
0.726268	0.0961
0.7271	0.096324
0.727932	0.096209
0.728763	0.096322
0.729595	0.095933
0.730427	0.09687
0.731259	0.097894
0.732091	0.098122
0.732923	0.099002
0.733754	0.09871
0.734586	0.098763
0.735418	0.099265
0.73625	0.099565
0.737082	0.099356
0.737913	0.098652
0.738745	0.098989
0.739577	0.099162
0.740409	0.100263
0.741241	0.100444
0.742073	0.100102
0.742904	0.099367
0.743736	0.099817
0.744568	0.100286
0.7454	0.100435
0.746232	0.100419
0.747064	0.100013
0.747895	0.099582
0.748727	0.099157
0.749559	0.09878
0.750391	0.098581
0.751223	0.098809
0.752055	0.099111
0.752886	0.099086
0.753718	0.099246
0.75455	0.098977
0.755382	0.09788
0.756214	0.09745
0.757045	0.097778
0.757877	0.097431
0.758709	0.097375
0.759541	0.097453
0.760373	0.097016
0.761205	0.096639
0.762036	0.09666
0.762868	0.096626
0.7637	0.096421
0.764532	0.09645
0.765364	0.096449
0.766196	0.096397
0.767027	0.096049
0.767859	0.09569
0.768691	0.095415
0.769523	0.095471
0.770355	0.095441
0.771186	0.095181
0.772018	0.094635
0.77285	0.094
0.773682	0.093819
0.774514	0.093109
0.775346	0.092589
0.776177	0.092326
0.777009	0.092159
0.777841	0.092773
0.778673	0.093152
0.779505	0.09361
0.780337	0.09333
0.781168	0.092795
0.782	0.092044
0.782832	0.091697
0.783664	0.091144
0.784496	0.090566
0.785327	0.090428
0.786159	0.090362
0.786991	0.090293
0.787823	0.09035
0.788655	0.090723
0.789487	0.090265
0.790318	0.089892
0.79115	0.089493
0.791982	0.088812
0.792814	0.088794
0.793646	0.088512
0.794478	0.088109
0.795309	0.087596
0.796141	0.088124
0.796973	0.089237
0.797805	0.08933
0.798637	0.089149
0.799469	0.08912
0.8003	0.08915
0.801132	0.089483
0.801964	0.089802
0.802796	0.089833
0.803628	0.089624
0.804459	0.089759
0.805291	0.089562
0.806123	0.088668
0.806955	0.088301
0.807787	0.088446
0.808619	0.089498
0.80945	0.090127
0.810282	0.089826
0.811114	0.089917
0.811946	0.090217
0.812778	0.090824
0.81361	0.091186
0.814441	0.090962
0.815273	0.090809
0.816105	0.09087
0.816937	0.091129
0.817769	0.090972
0.8186	0.090772
0.819432	0.090411
0.820264	0.089595
0.821096	0.088842
0.821928	0.08903
0.82276	0.089458
0.823591	0.08928
0.824423	0.089785
0.825255	0.090269
0.826087	0.090583
0.826919	0.090493
0.827751	0.090073
0.828582	0.090004
0.829414	0.090297
0.830246	0.090755
0.831078	0.091495
0.83191	0.092128
0.832741	0.091892
0.833573	0.092373
0.834405	0.092248
0.835237	0.091954
0.836069	0.09249
0.836901	0.092343
0.837732	0.091526
0.838564	0.090705
0.839396	0.090341
0.840228	0.089775
0.84106	0.089269
0.841892	0.088642
0.842723	0.088152
0.843555	0.088296
0.844387	0.088483
0.845219	0.088356
0.846051	0.08812
0.846883	0.088155
0.847714	0.088505
0.848546	0.089126
0.849378	0.089397
0.85021	0.089189
0.851042	0.08919
0.851873	0.089277
0.852705	0.089108
0.853537	0.088306
0.854369	0.087333
0.855201	0.086539
0.856033	0.086371
0.856864	0.086074
0.857696	0.085938
0.858528	0.086484
0.85936	0.086418
0.860192	0.085943
0.861024	0.085399
0.861855	0.085929
0.862687	0.086961
0.863519	0.086451
0.864351	0.08662
0.865183	0.087721
0.866014	0.08802
0.866846	0.087754
0.867678	0.087546
0.86851	0.087624
0.869342	0.087476
0.870174	0.087823
0.871005	0.087848
0.871837	0.087268
0.872669	0.086935
0.873501	0.086964
0.874333	0.08779
0.875165	0.08792
0.875996	0.087716
0.876828	0.087686
0.87766	0.087095
0.878492	0.087273
0.879324	0.087694
0.880156	0.087294
0.880987	0.087205
0.881819	0.088237
0.882651	0.088732
0.883483	0.089628
0.884315	0.089659
0.885146	0.089567
0.885978	0.089002
0.88681	0.089161
0.887642	0.089994
0.888474	0.090421
0.889306	0.090657
0.890137	0.090384
0.890969	0.090708
0.891801	0.090825
0.892633	0.090446
0.893465	0.090046
0.894297	0.089187
0.895128	0.088917
0.89596	0.089207
0.896792	0.08967
0.897624	0.090071
0.898456	0.089625
0.899287	0.088977
0.900119	0.088256
0.900951	0.088245
0.901783	0.088395
0.902615	0.088645
0.903447	0.08852
0.904278	0.088289
0.90511	0.088279
0.905942	0.087945
0.906774	0.086941
0.907606	0.086676
0.908438	0.086437
0.909269	0.087276
0.910101	0.086868
0.910933	0.086929
0.911765	0.086414
0.912597	0.087009
0.913428	0.08742
0.91426	0.087329
0.915092	0.086311
0.915924	0.085415
0.916756	0.084758
0.917588	0.084447
0.918419	0.084303
0.919251	0.084141
0.920083	0.084412
0.920915	0.083455
0.921747	0.084213
0.922579	0.083755
0.92341	0.082624
0.924242	0.082557
0.925074	0.082732
0.925906	0.083246
0.926738	0.082689
0.92757	0.082629
0.928401	0.082856
0.929233	0.082028
0.930065	0.08194
0.930897	0.082104
0.931729	0.08195
0.93256	0.081068
0.933392	0.080174
0.934224	0.08024
0.935056	0.080368
0.935888	0.081101
0.93672	0.081782
0.937551	0.08151
0.938383	0.081451
0.939215	0.080576
0.940047	0.081385
0.940879	0.082338
0.941711	0.08252
0.942542	0.082141
0.943374	0.082094
0.944206	0.081883
0.945038	0.082148
0.94587	0.082288
0.946701	0.081828
0.947533	0.081372
0.948365	0.080981
0.949197	0.081026
0.950029	0.081113
0.950861	0.081043
0.951692	0.081251
0.952524	0.081026
0.953356	0.080302
0.954188	0.079596
0.95502	0.078583
0.955852	0.077908
0.956683	0.07818
0.957515	0.077655
0.958347	0.077332
0.959179	0.076763
0.960011	0.075667
0.960842	0.0759
0.961674	0.07488
0.962506	0.076216
0.963338	0.075606
0.96417	0.074939
0.965002	0.074972
0.965833	0.075134
0.966665	0.074724
0.967497	0.073449
0.968329	0.073397
0.969161	0.073398
0.969993	0.072708
0.970824	0.07278
0.971656	0.072428
0.972488	0.072417
0.97332	0.071788
0.974152	0.072374
0.974984	0.073126
0.975815	0.073647
0.976647	0.073372
0.977479	0.07277
0.978311	0.073161
0.979143	0.073028
0.979974	0.073403
0.980806	0.073622
0.981638	0.073405
0.98247	0.072899
0.983302	0.073164
0.984134	0.073588
0.984965	0.073832
0.985797	0.074904
0.986629	0.075685
0.987461	0.075951
0.988293	0.075901
0.989125	0.075808
0.989956	0.07682
0.990788	0.076028
0.99162	0.075202
0.992452	0.074623
0.993284	0.073945
0.994116	0.074881
0.994947	0.07591
0.995779	0.075585
0.996611	0.07541
0.997443	0.075626
0.998275	0.075427
0.999106	0.076127
0.999938	0.076313
1.00077	0.07567
1.0016	0.07668
1.00243	0.077336
1.00327	0.078318
1.0041	0.077678
1.00493	0.077776
1.00576	0.078553
1.00659	0.078217
1.00743	0.077433
1.00826	0.077556
1.00909	0.077853
1.00992	0.077339
1.01075	0.077053
1.01158	0.077296
1.01242	0.077662
1.01325	0.078349
1.01408	0.077715
1.01491	0.078506
1.01574	0.078671
1.01658	0.079061
1.01741	0.077424
1.01824	0.07735
1.01907	0.078024
1.0199	0.077397
1.02073	0.077352
1.02157	0.077189
1.0224	0.077756
1.02323	0.077948
1.02406	0.078133
1.02489	0.078156
1.02572	0.078365
1.02656	0.077833
1.02739	0.076899
1.02822	0.074859
1.02905	0.073167
1.02988	0.073229
1.03072	0.07353
1.03155	0.073055
1.03238	0.072686
1.03321	0.072644
1.03404	0.071714
1.03487	0.072399
1.03571	0.0712
1.03654	0.071264
1.03737	0.070954
1.0382	0.071089
1.03903	0.071769
1.03987	0.071094
1.0407	0.071108
1.04153	0.070804
1.04236	0.072472
1.04319	0.072027
1.04402	0.071413
1.04486	0.070546
1.04569	0.070734
1.04652	0.070666
1.04735	0.070578
1.04818	0.071084
1.04902	0.071507
1.04985	0.07062
1.05068	0.07133
1.05151	0.071908
1.05234	0.071776
1.05317	0.071207
1.05401	0.069722
1.05484	0.06848
1.05567	0.068088
1.0565	0.068265
1.05733	0.06801
1.05817	0.067273
1.059	0.067807
1.05983	0.068238
1.06066	0.067108
1.06149	0.067322
1.06232	0.067237
1.06316	0.066417
1.06399	0.066062
1.06482	0.06583
1.06565	0.065127
1.06648	0.06471
1.06732	0.064301
1.06815	0.06339
1.06898	0.063234
1.06981	0.064055
1.07064	0.065388
1.07147	0.065416
1.07231	0.064758
1.07314	0.064453
1.07397	0.064212
1.0748	0.064516
1.07563	0.064814
1.07647	0.065078
1.0773	0.065901
1.07813	0.065511
1.07896	0.064669
1.07979	0.064982
1.08062	0.065078
1.08146	0.065667
1.08229	0.064831
1.08312	0.064845
1.08395	0.064518
1.08478	0.065249
1.08562	0.065365
1.08645	0.065266
1.08728	0.065103
1.08811	0.064313
1.08894	0.064169
1.08977	0.06377
1.09061	0.063493
1.09144	0.063696
1.09227	0.063904
1.0931	0.063055
1.09393	0.063823
1.09477	0.064633
1.0956	0.065509
1.09643	0.065418
1.09726	0.06579
1.09809	0.065808
1.09892	0.065691
1.09976	0.065817
1.10059	0.066973
1.10142	0.066818
1.10225	0.067903
1.10308	0.068111
1.10392	0.068215
1.10475	0.069055
1.10558	0.069202
1.10641	0.069174
1.10724	0.069274
1.10807	0.068278
1.10891	0.06805
1.10974	0.069178
1.11057	0.068587
1.1114	0.067822
1.11223	0.066382
1.11307	0.066602
1.1139	0.06684
1.11473	0.067143
1.11556	0.067286
1.11639	0.067591
1.11722	0.068323
1.11806	0.067945
1.11889	0.066999
1.11972	0.067191
1.12055	0.068355
1.12139	0.068742
1.12222	0.06833
1.12305	0.067802
1.12388	0.069193
1.12471	0.070382
1.12554	0.070467
1.12638	0.069829
1.12721	0.069176
1.12804	0.069097
1.12887	0.069076
1.1297	0.069521
1.13054	0.069421
1.13137	0.06904
1.1322	0.069152
1.13303	0.069787
1.13386	0.069066
1.13469	0.06985
1.13553	0.069953
1.13636	0.070125
1.13719	0.070508
1.13802	0.0715
1.13885	0.072406
1.13969	0.071832
1.14052	0.071511
1.14135	0.07129
1.14218	0.070712
1.14301	0.07062
1.14384	0.069561
1.14468	0.068564
1.14551	0.068342
1.14634	0.067322
1.14717	0.066298
1.148	0.06559
1.14884	0.065177
1.14967	0.065606
1.1505	0.065949
1.15133	0.065872
1.15216	0.06595
1.15299	0.067038
1.15383	0.067222
1.15466	0.067107
1.15549	0.067249
1.15632	0.067088
1.15715	0.066885
1.15799	0.06651
1.15882	0.065912
1.15965	0.0649
1.16048	0.064976
1.16131	0.064147
1.16214	0.063347
1.16298	0.062383
1.16381	0.061946
1.16464	0.062313
1.16547	0.060872
1.1663	0.059579
1.16714	0.059171
1.16797	0.05919
1.1688	0.059109
1.16963	0.059338
1.17046	0.059531
1.17129	0.059225
1.17213	0.059199
1.17296	0.05858
1.17379	0.058208
1.17462	0.057287
1.17545	0.056714
1.17629	0.056367
1.17712	0.055865
1.17795	0.055191
1.17878	0.05478
1.17961	0.054186
1.18044	0.053561
1.18128	0.054127
1.18211	0.054571
1.18294	0.054609
1.18377	0.054568
1.1846	0.054221
1.18544	0.054598
1.18627	0.055502
1.1871	0.055936
1.18793	0.056453
1.18876	0.057041
1.18959	0.056989
1.19043	0.057518
1.19126	0.057732
1.19209	0.057552
1.19292	0.057206
1.19375	0.0568
1.19459	0.056089
1.19542	0.05606
1.19625	0.05606
1.19708	0.056248
1.19791	0.055757
1.19874	0.055321
1.19958	0.054971
1.20041	0.055514
1.20124	0.056124
1.20207	0.056343
1.2029	0.056899
1.20373	0.05653
1.20457	0.056857
1.2054	0.057126
1.20623	0.056477
1.20706	0.056508
1.20789	0.056597
1.20873	0.056464
1.20956	0.055967
1.21039	0.055915
1.21122	0.055211
1.21205	0.054659
1.21288	0.054587
1.21372	0.05505
1.21455	0.056419
1.21538	0.056613
1.21621	0.057196
1.21704	0.05681
1.21788	0.056172
1.21871	0.055672
1.21954	0.055935
1.22037	0.055758
1.2212	0.0564
1.22203	0.056141
1.22287	0.055689
1.2237	0.055202
1.22453	0.054947
1.22536	0.055148
1.22619	0.055306
1.22703	0.055797
1.22786	0.055647
1.22869	0.055279
1.22952	0.055592
1.23035	0.055335
1.23118	0.055367
1.23202	0.055876
1.23285	0.056351
1.23368	0.056526
1.23451	0.057181
1.23534	0.058054
1.23618	0.058731
1.23701	0.059441
1.23784	0.059643
1.23867	0.059086
1.2395	0.059008
1.24033	0.05934
1.24117	0.059239
1.242	0.058708
1.24283	0.058918
1.24366	0.059357
1.24449	0.05926
1.24533	0.059933
1.24616	0.060702
1.24699	0.061093
1.24782	0.062122
1.24865	0.063114
1.24948	0.063444
1.25032	0.063524
1.25115	0.064057
1.25198	0.064722
1.25281	0.064989
1.25364	0.065013
1.25448	0.064852
1.25531	0.064108
1.25614	0.063573
1.25697	0.062895
1.2578	0.062485
1.25864	0.063409
1.25947	0.06461
1.2603	0.065214
1.26113	0.065225
1.26196	0.064899
1.26279	0.064416
1.26363	0.064221
1.26446	0.064012
1.26529	0.063949
1.26612	0.064328
1.26695	0.064645
1.26779	0.064959
1.26862	0.064606
1.26945	0.064884
1.27028	0.064367
1.27111	0.063272
1.27195	0.063684
1.27278	0.064002
1.27361	0.063163
1.27444	0.062236
1.27527	0.061747
1.2761	0.060512
1.27694	0.059683
1.27777	0.058213
1.2786	0.05696
1.27943	0.056452
1.28026	0.056132
1.2811	0.056005
1.28193	0.056289
1.28276	0.056433
1.28359	0.056124
1.28442	0.055344
1.28525	0.054672
1.28609	0.054884
1.28692	0.054395
1.28775	0.053572
1.28858	0.053212
1.28941	0.053312
1.29025	0.052876
1.29108	0.052384
1.29191	0.052478
1.29274	0.052817
1.29357	0.05238
1.2944	0.052343
1.29524	0.052468
1.29607	0.05246
1.2969	0.052646
1.29773	0.052418
1.29856	0.052551
1.2994	0.053321
1.30023	0.053044
1.30106	0.052421
1.30189	0.051865
1.30272	0.051157
1.30355	0.050149
1.30439	0.04958
1.30522	0.049188
1.30605	0.048935
1.30688	0.049054
1.30771	0.04894
1.30855	0.048023
1.30938	0.047221
1.31021	0.046863
1.31104	0.046563
1.31187	0.046185
1.3127	0.046259
1.31354	0.045647
1.31437	0.04484
1.3152	0.045004
1.31603	0.045774
1.31686	0.046367
1.3177	0.046521
1.31853	0.046469
1.31936	0.046638
1.32019	0.047182
1.32102	0.047672
1.32185	0.047952
1.32269	0.048153
1.32352	0.048524
1.32435	0.049319
1.32518	0.049762
1.32601	0.050423
1.32685	0.051066
1.32768	0.050765
1.32851	0.050766
1.32934	0.051029
1.33017	0.050698
1.331	0.050017
1.33184	0.049589
1.33267	0.0499
1.3335	0.05023
1.33433	0.049281
1.33516	0.049177
1.336	0.049311
1.33683	0.049507
1.33766	0.049635
1.33849	0.049856
1.33932	0.049973
1.34015	0.049595
1.34099	0.049788
1.34182	0.049755
1.34265	0.049957
1.34348	0.050561
1.34431	0.050905
1.34515	0.05135
1.34598	0.051301
1.34681	0.051572
1.34764	0.05198
1.34847	0.051888
1.3493	0.051726
1.35014	0.052546
1.35097	0.052704
1.3518	0.052866
1.35263	0.052537
1.35346	0.053157
1.3543	0.053706
1.35513	0.05387
1.35596	0.054812
1.35679	0.055038
1.35762	0.053754
1.35845	0.053457
1.35929	0.05356
1.36012	0.053649
1.36095	0.053859
1.36178	0.053496
1.36261	0.053161
1.36345	0.054066
1.36428	0.05495
1.36511	0.055559
1.36594	0.055512
1.36677	0.056284
1.3676	0.057603
1.36844	0.057378
1.36927	0.057033
1.3701	0.057519
1.37093	0.058023
1.37176	0.058121
1.3726	0.05793
1.37343	0.058046
1.37426	0.058206
1.37509	0.057838
1.37592	0.057848
1.37675	0.057447
1.37759	0.057551
1.37842	0.057406
1.37925	0.056803
1.38008	0.056646
1.38091	0.057711
1.38175	0.058664
1.38258	0.058146
1.38341	0.057414
1.38424	0.056591
1.38507	0.056111
1.3859	0.056266
1.38674	0.056656
1.38757	0.057323
1.3884	0.056607
1.38923	0.05633
1.39006	0.056483
1.3909	0.05591
1.39173	0.054926
1.39256	0.054582
1.39339	0.055036
1.39422	0.054488
1.39505	0.054642
1.39589	0.054767
1.39672	0.054917
1.39755	0.05443
1.39838	0.054406
1.39921	0.055533
1.40005	0.056077
1.40088	0.056206
1.40171	0.057059
1.40254	0.056791
1.40337	0.057272
1.4042	0.057436
1.40504	0.056572
1.40587	0.056312
1.4067	0.054945
1.40753	0.054363
1.40836	0.052833
1.4092	0.051094
1.41003	0.049894
1.41086	0.049468
1.41169	0.0493
1.41252	0.048879
1.41335	0.048454
1.41419	0.047918
1.41502	0.048454
1.41585	0.048246
1.41668	0.048619
1.41751	0.049114
1.41835	0.05022
1.41918	0.04999
1.42001	0.049949
1.42084	0.050431
1.42167	0.050281
1.4225	0.049256
1.42334	0.048473
1.42417	0.048263
1.425	0.048322
1.42583	0.048261
1.42666	0.048543
1.4275	0.048656
1.42833	0.048761
1.42916	0.048564
1.42999	0.048763
1.43082	0.048582
1.43165	0.047941
1.43249	0.048814
1.43332	0.04991
1.43415	0.050387
1.43498	0.049554
1.43581	0.049948
1.43665	0.049849
1.43748	0.049775
1.43831	0.050104
1.43914	0.050358
1.43997	0.049943
1.4408	0.049696
1.44164	0.049569
1.44247	0.049836
1.4433	0.049479
1.44413	0.049458
1.44496	0.049608
1.4458	0.048529
1.44663	0.048189
1.44746	0.046975
1.44829	0.047332
1.44912	0.046534
1.44996	0.04718
1.45079	0.047281
1.45162	0.047535
1.45245	0.047545
1.45328	0.04738
1.45411	0.047231
1.45495	0.047312
1.45578	0.048152
1.45661	0.048144
1.45744	0.048411
1.45827	0.048476
1.45911	0.048057
1.45994	0.047822
1.46077	0.047912
1.4616	0.04816
1.46243	0.048648
1.46326	0.049348
1.4641	0.050439
1.46493	0.051418
1.46576	0.051538
1.46659	0.051649
1.46742	0.052627
1.46826	0.052175
1.46909	0.05183
1.46992	0.051858
1.47075	0.051777
1.47158	0.052298
1.47241	0.05283
1.47325	0.054182
1.47408	0.054401
1.47491	0.054176
1.47574	0.053664
1.47657	0.053152
1.47741	0.052884
1.47824	0.052307
1.47907	0.052175
1.4799	0.052313
1.48073	0.052238
1.48157	0.052481
1.4824	0.052896
1.48323	0.053073
1.48406	0.052473
1.48489	0.051695
1.48572	0.051496
1.48656	0.050218
1.48739	0.051214
1.48822	0.051782
1.48905	0.052702
1.48988	0.052921
1.49072	0.053495
1.49155	0.053269
1.49238	0.053504
1.49321	0.053772
1.49404	0.054351
1.49487	0.054512
1.49571	0.053835
1.49654	0.053051
1.49737	0.0533
1.4982	0.052511
1.49903	0.051966
1.49987	0.052131
1.5007	0.051695
1.50153	0.05104
1.50236	0.05034
1.50319	0.049869
1.50402	0.049591
1.50486	0.049439
1.50569	0.048955
1.50652	0.048005
1.50735	0.048047
1.50818	0.04856
1.50901	0.048511
1.50985	0.048822
1.51068	0.048547
1.51151	0.048155
1.51234	0.047935
1.51317	0.047726
1.51401	0.047335
1.51484	0.04682
1.51567	0.046677
1.5165	0.045922
1.51733	0.046484
1.51816	0.047537
1.519	0.0481
1.51983	0.048188
1.52066	0.04773
1.52149	0.047397
1.52232	0.0483
1.52316	0.048425
1.52399	0.048298
1.52482	0.047495
1.52565	0.047044
1.52648	0.047014
1.52731	0.047013
1.52815	0.047875
1.52898	0.047206
1.52981	0.047606
1.53064	0.046865
1.53147	0.046834
1.53231	0.047251
1.53314	0.047542
1.53397	0.047467
1.5348	0.047108
1.53563	0.046774
1.53646	0.04667
1.5373	0.046638
1.53813	0.047359
1.53896	0.046305
1.53979	0.047022
1.54062	0.046736
1.54146	0.046145
1.54229	0.046727
1.54312	0.046889
1.54395	0.047833
1.54478	0.048029
1.54561	0.0481
1.54645	0.048924
1.54728	0.048298
1.54811	0.048777
1.54894	0.04917
1.54977	0.048827
1.55061	0.049113
1.55144	0.050095
1.55227	0.051284
1.5531	0.051127
1.55393	0.051591
1.55476	0.051691
1.5556	0.051707
1.55643	0.051095
1.55726	0.050956
1.55809	0.051411
1.55892	0.050773
1.55976	0.049996
1.56059	0.049677
1.56142	0.04995
1.56225	0.05061
1.56308	0.051117
1.56391	0.049829
1.56475	0.049554
1.56558	0.048358
1.56641	0.048224
1.56724	0.049088
1.56807	0.049337
1.56891	0.049514
1.56974	0.04931
1.57057	0.050255
1.5714	0.04998
1.57223	0.050847
1.57306	0.050366
1.5739	0.049601
1.57473	0.049905
1.57556	0.049991
1.57639	0.049822
1.57722	0.050471
1.57806	0.050901
1.57889	0.051994
1.57972	0.052233
1.58055	0.052391
1.58138	0.052259
1.58221	0.051449
1.58305	0.051009
1.58388	0.050864
1.58471	0.05117
1.58554	0.051334
1.58638	0.051085
1.58721	0.050486
1.58804	0.04896
1.58887	0.048559
1.5897	0.048107
1.59053	0.04819
1.59136	0.048908
1.5922	0.048947
1.59303	0.048022
1.59386	0.047254
1.59469	0.047816
1.59553	0.047172
1.59636	0.046973
1.59719	0.046612
1.59802	0.046788
1.59885	0.047272
1.59968	0.046919
1.60051	0.046869
1.60135	0.047737
1.60218	0.048546
1.60301	0.049053
1.60384	0.04865
1.60468	0.047688
1.60551	0.047827
1.60634	0.048099
1.60717	0.048535
1.608	0.049148
1.60883	0.049365
1.60967	0.049588
1.6105	0.049688
1.61133	0.050952
1.61216	0.051057
1.61299	0.050866
1.61383	0.050686
1.61466	0.050843
1.61549	0.050739
1.61632	0.05055
1.61715	0.050628
1.61798	0.051374
1.61882	0.051033
1.61965	0.050268
1.62048	0.049677
1.62131	0.049187
1.62214	0.05002
1.62298	0.050192
1.62381	0.050939
1.62464	0.051217
1.62547	0.051341
1.6263	0.051177
1.62713	0.050861
1.62797	0.050863
1.6288	0.051317
1.62963	0.051676
1.63046	0.053074
1.63129	0.052948
1.63213	0.052171
1.63296	0.0526
1.63379	0.051942
1.63462	0.051785
1.63545	0.051839
1.63628	0.051764
1.63712	0.05224
1.63795	0.052768
1.63878	0.05333
1.63961	0.053025
1.64044	0.05137
1.64128	0.052057
1.64211	0.052336
1.64294	0.0513
1.64377	0.051372
1.6446	0.051059
1.64543	0.051222
1.64627	0.051982
1.6471	0.052262
1.64793	0.05237
1.64876	0.052853
1.64959	0.052193
1.65043	0.051203
1.65126	0.051314
1.65209	0.051499
1.65292	0.050584
1.65375	0.049893
1.65458	0.049527
[truncated: 24,501 more rows]

## Sheet: Figure 2c
					1:1 binding model
Time	4000 nM	Fir	2000 nM	Fit	1000 nM	Fit	500 nM	Fit	250 nM	Fit	125 nM	Fit	62.5 nM	Fit
-59.86	0.142073	0	0.554726	0	0.572346	0	0.493006	0	0.963791	0	0.803432	0	1.035	0
-58.86	0.368877	0	0.196983	0	0.475089	0	0.56815	0	0.588005	0	0.859979	0	0.715949	0
-57.86	0.386723	0	0.350426	0	0.456514	0	0.523563	0	0.694099	0	0.806799	0	0.786668	0
-56.86	0.350254	0	0.357155	0	0.442725	0	0.48386	0	0.67794	0	0.771546	0	0.769286	0
-55.86	0.35876	0	0.348938	0	0.444136	0	0.474538	0	0.663399	0	0.778757	0	0.751166	0
-54.86	0.341884	0	0.324341	0	0.425627	0	0.451962	0	0.622314	0	0.753214	0	0.694761	0
-53.86	0.373698	0	0.311447	0	0.394246	0	0.42851	0	0.571686	0	0.732715	0	0.634091	0
-52.86	0.364904	0	0.306679	0	0.395198	0	0.437052	0	0.550827	0	0.734647	0	0.571681	0
-51.86	0.301767	0	0.306435	0	0.439303	0	0.455573	0	0.614334	0	0.773733	0	0.70399	0
-50.86	0.249828	0	0.308388	0	0.407768	0	0.360875	0	0.564957	0	0.629639	0	0.606834	0
-49.86	0.193168	0	0.219559	0	0.301176	0	0.345498	0	0.437454	0	0.594515	0	0.512892	0
-48.86	0.200158	0	0.202065	0	0.302682	0	0.372306	0	0.429413	0	0.572737	0	0.498384	0
-47.86	0.206025	0	0.203552	0	0.325067	0	0.372588	0	0.441055	0	0.586569	0	0.517565	0
-46.86	0.222041	0	0.229492	0	0.306798	0	0.354306	0	0.424347	0	0.589465	0	0.526792	0
-45.86	0.221255	0	0.200508	0	0.284765	0	0.329229	0	0.391922	0	0.57017	0	0.501951	0
-44.86	0.190959	0	0.180977	0	0.279714	0	0.307569	0	0.369263	0	0.541384	0	0.48557	0
-43.86	0.178425	0	0.156212	0	0.270005	0	0.283809	0	0.35434	0	0.514022	0	0.457505	0
-42.86	0.148677	0	0.139183	0	0.244642	0	0.251058	0	0.330978	0	0.475711	0	0.438787	0
-41.86	0.131016	0	0.120033	0	0.212685	0	0.232929	0	0.296913	0	0.441955	0	0.416596	0
-40.86	0.101174	0	0.118469	0	0.172251	0	0.192969	0	0.270424	0	0.398985	0	0.387484	0
-39.86	0.0907084	0	0.0973053	0	0.132451	0	0.161527	0	0.236366	0	0.354693	0	0.337919	0
-38.86	0.0793008	0	0.0594864	0	0.0941333	0	0.128211	0	0.218475	0	0.313757	0	0.309442	0
-37.86	0.0660256	0	0.0446548	0	0.0730836	0	0.125907	0	0.198952	0	0.293761	0	0.287065	0
-36.86	0.041569	0	0.0172272	0	0.0610508	0	0.100902	0	0.186378	0	0.270561	0	0.251755	0
-35.86	0.0363928	0	-0.0108261	0	0.0469526	0	0.0996698	0	0.15168	0	0.24504	0	0.215234	0
-34.86	0.0301827	0	-0.0107422	0	0.0555742	0	0.0865546	0	0.146996	0	0.235213	0	0.20862	0
-33.86	0.0450081	0	-0.031601	0	0.053479	0	0.0923973	0	0.138794	0	0.238605	0	0.181676	0
-32.86	0.053358	0	-0.0155029	0	0.0521048	0	0.0822698	0	0.125519	0	0.20985	0	0.177494	0
-31.86	0.0631324	0	-0.0385666	0	0.053816	0	0.0789956	0	0.102844	0	0.195238	0	0.152952	0
-30.86	0.0732063	0	-0.0217514	0	0.0617186	0	0.0929009	0	0.0945816	0	0.189227	0	0.165623	0
-29.86	0.095469	0	-0.0198822	0	0.0701494	0	0.0968833	0	0.107544	0	0.175792	0	0.167806	0
-28.86	0.0875039	0	-0.020195	0	0.0717134	0	0.0871177	0	0.0962143	0	0.157817	0	0.167806	0
-27.86	0.0823462	0	-0.020195	0	0.081555	0	0.100553	0	0.0977783	0	0.151416	0	0.153035	0
-26.86	0.0853204	0	-0.023407	0	0.0785081	0	0.0850059	0	0.104332	0	0.161574	0	0.153429	0
-25.86	0.0839882	0	-0.0369873	0	0.0709	0	0.0713692	0	0.0942688	0	0.157585	0	0.147148	0
-24.86	0.0673302	0	-0.0170746	0	0.0519502	0	0.0456077	0	0.0844879	0	0.153319	0	0.12031	0
-23.86	0.0689947	0	-0.0236282	0	0.0349086	0	0.0432261	0	0.0665283	0	0.156772	0	0.11147	0
-22.86	0.0700673	0	0.00285	0	0.0418299	0	0.042367	0	0.083313	0	0.163241	0	0.118391	0
-21.86	0.0879018	0	0.0322342	0	0.0717081	0	0.0777629	0	0.0930939	0	0.181695	0	0.126785	0
-20.86	0.0908605	0	0.0699539	0	0.0950665	0	0.102972	0	0.137222	0	0.195003	0	0.152096	0
-19.86	0.0910914	0	0.0907364	0	0.12249	0	0.127735	0	0.15168	0	0.18399	0	0.171319	0
-18.86	0.0867949	0	0.0887833	0	0.117804	0	0.121488	0	0.138008	0	0.123751	0	0.15843	0
-17.86	0.10929	0	0.0430832	0	0.0840891	0	0.109338	0	0.0778503	0	0.0940649	0	0.0820597	0
-16.86	0.0950533	0	0.0484695	0	0.0383655	0	0.0679335	0	0.0785522	0	0.0652265	0	0.0314074	0
-15.86	0.0585327	0	0.0447311	0	-0.0262985	0	0.0514755	0	0.0748138	0	0.0845871	0	0.0112	0
-14.86	0.0540794	0	0.0450363	0	0.0109603	0	0.0590569	0	0.0884018	0	0.0945848	0	0.0449416	0
-13.86	0.0650886	0	0.0336304	0	0.0191008	0	0.060598	0	0.0734787	0	0.102435	0	0.0351149	0
-12.86	0.059147	0	0.0383987	0	0.0194551	0	0.045948	0	0.0649719	0	0.0748518	0	0.0354692	0
-11.86	0.0485938	0	0.0184708	0	0.0105406	0	0.0456292	0	0.0372314	0	0.06821	0	0.0183531	0
-10.86	0.0320307	0	0.0320587	0	0.0312779	0	0.0345663	0	0.0308914	0	0.0445354	0	0.0179951	0
-9.85999	0.000779	0	0.0204239	0	0.0141314	0	0.0273505	0	-0.00223	0	0.0329725	0	0.0172518	0
-8.85999	-0.0124183	0	0.00754	0	0.0014	0	0.0250068	0	-0.00691	0	0.0320387	0	-0.000552	0
-7.85999	-0.0237479	0	-0.000664	0	-0.0165663	0	0.00704	0	-0.0151138	0	0.0221968	0	-0.0118818	0
-6.85999	-0.0377384	0	-0.0139465	0	-0.02098	0	-0.0174603	0	-0.0166779	0	0.00102	0	-0.0248099	0
-5.85999	-0.0301521	0	-0.0530167	0	-0.0471588	0	-0.0293266	0	-0.0526199	0	-0.0129609	0	-0.05224	0
-4.85999	-0.0043	0	-0.0463638	0	-0.0469971	0	-0.0313606	0	-0.0557327	0	-0.00569	0	-0.055275	0
-3.85999	-0.0299116	0	-0.0366058	0	-0.048135	0	-0.00827	0	-0.0573044	0	-0.0153873	0	-0.063287	0
-2.85999	0.0140558	0	-0.0351105	0	-0.0770749	0	0.000196	0	-0.0444031	0	0.00697	0	-0.0966062	0
-1.85999	-0.104956	0	-0.0271606	0	-0.105976	0	-0.227037	0	-0.0398102	0	-0.100086	0	-0.130978	0
-0.859985	-0.161062	0	-0.159805	0	-0.0711243	0	0.708967	0	-0.314804	0	0.306285	0	-0.140346	0
0.140015	16.9773	10.2163	-1.29121	0	-0.840875	0	1.51494	0.7141	-0.928703	0	-1.46076	0	-1.39431	0
1.14001	44.7507	47.6245	14.7515	12.0957	10.8319	7.59215	8.9204	8.19438	1.86504	2.78188	1.3783	3.12178	0.508156	1.62787
2.14001	57.0598	61.583	33.7802	33.4075	22.3771	19.7768	15.7048	14.0378	5.99403	6.37319	3.20848	4.83782	1.21648	2.54129
3.14001	62.6341	66.7915	44.4676	45.5372	30.4066	28.3417	20.412	18.6026	9.48177	9.33068	5.0354	6.28879	2.32765	3.32387
4.14001	65.7214	68.735	50.5235	52.441	35.8342	34.3622	23.8815	22.1685	12.2661	11.7662	6.5279	7.51563	3.27339	3.99436
5.14001	67.656	69.4602	54.2638	56.3703	39.5722	38.5942	26.5771	24.9541	14.4669	13.7719	7.75849	8.55297	4.01475	4.56882
6.14001	68.8485	69.7308	56.6821	58.6067	42.1886	41.569	28.5931	27.1302	16.268	15.4236	8.76754	9.43007	4.66403	5.06098
7.14001	69.652	69.8318	58.3098	59.8796	44.0815	43.6601	30.1536	28.8301	17.6861	16.7839	9.67972	10.1717	5.22367	5.48266
8.14001	70.3062	69.8696	59.4775	60.604	45.4538	45.1299	31.3551	30.1581	18.8346	17.904	10.4307	10.7988	5.71518	5.84393
9.14001	70.6969	69.8836	60.3161	61.0163	46.4906	46.1632	32.3338	31.1954	19.786	18.8265	11.0774	11.329	6.08355	6.15346
10.14	71.0609	69.8888	60.8786	61.251	47.262	46.8894	33.0914	32.0058	20.6075	19.5861	11.6154	11.7773	6.40535	6.41865
11.14	71.3509	69.8908	61.3146	61.3846	47.8637	47.4	33.7191	32.6388	21.2333	20.2117	12.124	12.1563	6.73124	6.64586
12.14	71.5918	69.8915	61.6267	61.4607	48.2926	47.7588	34.195	33.1333	21.804	20.7269	12.5115	12.4768	7.03562	6.84052
13.14	71.7693	69.8918	61.9161	61.5039	48.6457	48.0111	34.5759	33.5196	22.3005	21.1512	12.8409	12.7478	7.27265	7.0073
14.14	71.9183	69.8919	62.1462	61.5286	48.9722	48.1884	34.8773	33.8214	22.642	21.5006	13.1412	12.977	7.47339	7.15019
15.14	72.0309	69.8919	62.3571	61.5426	49.1939	48.313	35.1103	34.0571	22.9314	21.7883	13.378	13.1707	7.6526	7.27262
16.14	72.1148	69.8919	62.5189	61.5505	49.3444	48.4007	35.3143	34.2413	23.1927	22.0252	13.5906	13.3345	7.80187	7.3775
17.14	72.199	69.8919	62.6645	61.5551	49.4764	48.4623	35.4887	34.3852	23.4001	22.2204	13.8231	13.4731	7.95035	7.46737
18.14	72.251	69.8919	62.7767	61.5576	49.5742	48.5055	35.6423	34.4975	23.5633	22.381	14.0155	13.5902	8.06601	7.54436
19.14	72.2897	69.8919	62.8686	61.5591	49.6568	48.536	35.7571	34.5853	23.6975	22.5134	14.1242	13.6892	8.18612	7.61032
20.14	72.3208	69.8919	62.9457	61.5599	49.7144	48.5574	35.8339	34.6539	23.8056	22.6224	14.2323	13.7729	8.28749	7.66684
21.14	72.3402	69.8919	62.9978	61.5604	49.7548	48.5724	35.8974	34.7075	23.8954	22.7121	14.322	13.8437	8.34772	7.71525
22.14	72.3438	69.8919	63.0548	61.5607	49.7997	48.583	35.9381	34.7493	23.9837	22.786	14.426	13.9036	8.40245	7.75674
23.14	72.3516	69.8919	63.0583	61.5608	49.8125	48.5904	35.9604	34.782	24.0422	22.8469	14.4953	13.9542	8.44301	7.79228
24.14	72.3509	69.8919	63.0775	61.5609	49.8353	48.5956	35.9795	34.8076	24.1025	22.897	14.568	13.997	8.48526	7.82273
25.14	72.3512	69.8919	63.1087	61.561	49.8533	48.5993	35.9915	34.8275	24.1532	22.9383	14.6395	14.0332	8.52757	7.84882
26.14	72.328	69.8919	63.1364	61.561	49.8751	48.6018	36.0067	34.8431	24.1861	22.9722	14.6974	14.0638	8.5743	7.87117
27.14	72.3187	69.8919	63.1677	61.561	49.9022	48.6037	35.9997	34.8553	24.2255	23.0002	14.7703	14.0896	8.61584	7.89032
28.14	72.3067	69.8919	63.179	61.561	49.9047	48.6049	35.9986	34.8648	24.245	23.0233	14.8331	14.1115	8.63635	7.90673
29.14	72.2892	69.8919	63.1954	61.561	49.9111	48.6058	36.0021	34.8722	24.2629	23.0423	14.8858	14.13	8.68028	7.92079
30.14	72.2667	69.8919	63.1885	61.561	49.9189	48.6065	35.983	34.878	24.2643	23.0579	14.9166	14.1456	8.68335	7.93283
31.14	72.2321	69.8919	63.1676	61.561	49.893	48.6069	35.9537	34.8825	24.2548	23.0708	14.9445	14.1589	8.69299	7.94315
32.14	72.1989	69.8919	63.156	61.561	49.8794	48.6072	35.9497	34.8861	24.2431	23.0814	14.987	14.1701	8.68455	7.95199
33.14	72.1783	69.8919	63.1497	61.561	49.8561	48.6074	35.9212	34.8888	24.245	23.0901	15.0235	14.1795	8.70571	7.95956
34.14	72.155	69.8919	63.1494	61.561	49.8443	48.6076	35.9103	34.891	24.2365	23.0973	15.0373	14.1875	8.71655	7.96605
35.14	72.1446	69.8919	63.1481	61.561	49.8267	48.6077	35.8919	34.8927	24.227	23.1032	15.0658	14.1943	8.72987	7.97161
36.14	72.134	69.8919	63.1575	61.561	49.8135	48.6078	35.8725	34.894	24.2169	23.1081	15.0822	14.2	8.74004	7.97637
37.14	72.1239	69.8919	63.14	61.561	49.7856	48.6078	35.8678	34.895	24.2075	23.1121	15.0863	14.2048	8.73596	7.98046
38.14	72.1153	69.8919	63.1383	61.561	49.7634	48.6079	35.8645	34.8958	24.1942	23.1154	15.1078	14.2089	8.75647	7.98395
39.14	72.0941	69.8919	63.1381	61.561	49.7535	48.6079	35.853	34.8965	24.1939	23.1181	15.1389	14.2123	8.75151	7.98695
40.14	72.0583	69.8919	63.125	61.561	49.7325	48.6079	35.8436	34.897	24.1861	23.1204	15.1588	14.2153	8.75683	7.98951
41.14	72.0302	69.8919	63.0907	61.561	49.6971	48.6079	35.8412	34.8973	24.1649	23.1222	15.1686	14.2177	8.72981	7.99171
42.14	71.9964	69.8919	63.0614	61.561	49.6849	48.6079	35.8375	34.8976	24.1662	23.1237	15.1776	14.2198	8.73026	7.9936
43.14	71.9407	69.8919	63.0548	61.561	49.6734	48.6079	35.8148	34.8979	24.1567	23.125	15.1924	14.2216	8.7289	7.99521
44.14	71.8887	69.8919	63.027	61.561	49.6537	48.6079	35.7758	34.8981	24.1286	23.126	15.182	14.2231	8.72866	7.99659
45.14	71.8486	69.8919	63.0056	61.561	49.6222	48.6079	35.7636	34.8982	24.0961	23.1269	15.187	14.2243	8.72617	7.99778
46.14	71.7909	69.8919	62.9896	61.561	49.6046	48.6079	35.7382	34.8983	24.0861	23.1276	15.172	14.2254	8.72018	7.99879
47.14	71.748	69.8919	62.9388	61.561	49.5828	48.6079	35.7057	34.8984	24.0457	23.1281	15.1629	14.2263	8.7016	7.99966
48.14	71.7039	69.8919	62.9094	61.561	49.5532	48.6079	35.6927	34.8985	24.0239	23.1286	15.1742	14.2271	8.68049	8.00041
49.14	71.6425	69.8919	62.8798	61.561	49.525	48.6079	35.6548	34.8985	23.9962	23.129	15.1626	14.2277	8.65691	8.00105
50.14	71.5963	69.8919	62.8489	61.561	49.4985	48.6079	35.6348	34.8986	23.9704	23.1293	15.16	14.2283	8.63534	8.00159
51.14	71.5633	69.8919	62.831	61.561	49.4766	48.6079	35.6161	34.8986	23.9392	23.1296	15.1645	14.2287	8.62027	8.00206
52.14	71.5301	69.8919	62.8082	61.561	49.4457	48.6079	35.6001	34.8986	23.918	23.1298	15.1724	14.2291	8.60045	8.00246
53.14	71.5025	69.8919	62.795	61.561	49.4449	48.6079	35.5929	34.8986	23.9164	23.13	15.1693	14.2294	8.60157	8.00281
54.14	71.4808	69.8919	62.7786	61.561	49.4264	48.6079	35.5737	34.8987	23.8982	23.1301	15.1651	14.2297	8.6108	8.0031
55.14	71.4536	69.8919	62.7575	61.561	49.4155	48.6079	35.5624	34.8987	23.8954	23.1303	15.1706	14.23	8.61117	8.00336
56.14	71.4333	69.8919	62.7282	61.561	49.3872	48.6079	35.5619	34.8987	23.8951	23.1304	15.155	14.2302	8.61066	8.00357
57.14	71.3949	69.8919	62.708	61.561	49.3679	48.6079	35.5362	34.8987	23.8868	23.1305	15.1474	14.2303	8.63861	8.00376
58.14	71.3649	69.8919	62.7051	61.561	49.3331	48.6079	35.5104	34.8987	23.8853	23.1305	15.1381	14.2305	8.64796	8.00392
59.14	71.3255	69.8919	62.6692	61.561	49.298	48.6079	35.4882	34.8987	23.8594	23.1306	15.1119	14.2306	8.64062	8.00405
60.14	71.2774	69.8919	62.651	61.561	49.2767	48.6079	35.472	34.8987	23.8475	23.1306	15.0861	14.2307	8.64273	8.00417
61.14	71.2441	69.8919	62.625	61.561	49.2457	48.6079	35.4427	34.8987	23.8282	23.1307	15.0613	14.2308	8.64097	8.00427
62.14	71.2137	69.8919	62.6087	61.561	49.2282	48.6079	35.4232	34.8987	23.8185	23.1307	15.0567	14.2308	8.64105	8.00435
63.14	71.1694	69.8919	62.5892	61.561	49.1929	48.6079	35.3878	34.8987	23.7973	23.1307	15.024	14.2309	8.62882	8.00443
64.14	71.1354	69.8919	62.5384	61.561	49.1668	48.6079	35.3614	34.8987	23.7772	23.1307	15.0003	14.231	8.61249	8.00449
65.14	71.0778	69.8919	62.5193	61.561	49.1372	48.6079	35.3442	34.8987	23.768	23.1308	14.9971	14.231	8.62042	8.00454
66.14	71.0238	69.8919	62.4879	61.561	49.0983	48.6079	35.3316	34.8987	23.7399	23.1308	14.9788	14.231	8.61273	8.00459
67.14	70.9678	69.8919	62.4582	61.561	49.0831	48.6079	35.2995	34.8987	23.7185	23.1308	14.9663	14.2311	8.61046	8.00463
68.14	70.9421	69.8919	62.4107	61.561	49.0568	48.6079	35.2899	34.8987	23.6911	23.1308	14.9471	14.2311	8.59741	8.00466
69.14	70.9109	69.8919	62.3883	61.561	49.0462	48.6079	35.2827	34.8987	23.6875	23.1308	14.9398	14.2311	8.61303	8.00469
70.14	70.8825	69.8919	62.3583	61.561	49.0358	48.6079	35.2695	34.8987	23.6579	23.1308	14.9246	14.2311	8.60374	8.00472
71.14	70.8376	69.8919	62.3391	61.561	49.0338	48.6079	35.236	34.8987	23.6582	23.1308	14.9072	14.2312	8.61182	8.00474
72.14	70.821	69.8919	62.2915	61.561	49.0161	48.6079	35.2194	34.8987	23.6221	23.1308	14.8848	14.2312	8.61338	8.00476
73.14	70.7919	69.8919	62.2884	61.561	49.0151	48.6079	35.2027	34.8987	23.6078	23.1308	14.8863	14.2312	8.61428	8.00477
74.14	70.7393	69.8919	62.259	61.561	48.9932	48.6079	35.1586	34.8987	23.57	23.1308	14.8732	14.2312	8.62214	8.00479
75.14	70.699	69.8919	62.2212	61.561	48.9682	48.6079	35.1189	34.8987	23.5306	23.1308	14.8525	14.2312	8.60483	8.0048
76.14	70.67	69.8919	62.2067	61.561	48.9624	48.6079	35.135	34.8987	23.5224	23.1308	14.8306	14.2312	8.60232	8.00481
77.14	70.6417	69.8919	62.1774	61.561	48.9476	48.6079	35.1215	34.8987	23.5243	23.1308	14.8224	14.2312	8.58621	8.00482
78.14	70.5956	69.8919	62.1525	61.561	48.9286	48.6079	35.1239	34.8987	23.5193	23.1308	14.8197	14.2312	8.57507	8.00482
79.14	70.5757	69.8919	62.1203	61.561	48.9008	48.6079	35.1254	34.8987	23.5063	23.1308	14.7916	14.2312	8.55741	8.00483
80.14	70.5362	69.8919	62.1153	61.561	48.8954	48.6079	35.0994	34.8987	23.5044	23.1308	14.7762	14.2312	8.56304	8.00483
81.14	70.4991	69.8919	62.0807	61.561	48.8716	48.6079	35.0897	34.8987	23.4802	23.1308	14.7492	14.2312	8.53956	8.00484
82.14	70.4602	69.8919	62.0582	61.561	48.8647	48.6079	35.0749	34.8987	23.4786	23.1308	14.7195	14.2312	8.54429	8.00484
83.14	70.4236	69.8919	62.0286	61.561	48.8347	48.6079	35.0396	34.8987	23.4473	23.1308	14.687	14.2312	8.52382	8.00485
84.14	70.3915	69.8919	61.9977	61.561	48.8092	48.6079	35.0258	34.8987	23.418	23.1308	14.6507	14.2312	8.50679	8.00485
85.14	70.3523	69.8919	61.96	61.561	48.7846	48.6079	35.0147	34.8987	23.4064	23.1308	14.6178	14.2312	8.47525	8.00485
86.14	70.338	69.8919	61.9176	61.561	48.7672	48.6079	35.0263	34.8987	23.3852	23.1308	14.6035	14.2312	8.44644	8.00485
87.14	70.2914	69.8919	61.9161	61.561	48.7744	48.6079	35.0327	34.8987	23.3869	23.1308	14.6044	14.2312	8.44397	8.00485
88.14	70.2423	69.8919	61.8978	61.561	48.757	48.6079	35.0272	34.8987	23.3954	23.1308	14.5892	14.2312	8.44296	8.00486
89.14	70.2029	69.8919	61.8766	61.561	48.7369	48.6079	35.0128	34.8987	23.3786	23.1308	14.5813	14.2312	8.44389	8.00486
90.14	70.1563	69.8919	61.8568	61.561	48.7347	48.6079	34.9828	34.8987	23.3673	23.1308	14.5574	14.2312	8.45186	8.00486
91.14	70.1043	69.8919	61.8278	61.561	48.6957	48.6079	34.9407	34.8987	23.3379	23.1308	14.5438	14.2312	8.44213	8.00486
92.14	70.0806	69.8919	61.7965	61.561	48.6653	48.6079	34.9095	34.8987	23.3083	23.1308	14.5188	14.2312	8.43284	8.00486
93.14	70.047	69.8919	61.7868	61.561	48.6441	48.6079	34.883	34.8987	23.3071	23.1308	14.5112	14.2312	8.43116	8.00486
94.14	70.0242	69.8919	61.7591	61.561	48.6169	48.6079	34.8703	34.8987	23.2872	23.1308	14.5111	14.2312	8.41217	8.00486
95.14	69.9793	69.8919	61.7376	61.561	48.6039	48.6079	34.8454	34.8987	23.2857	23.1308	14.4949	14.2312	8.38244	8.00486
96.14	69.9396	69.8919	61.7	61.561	48.5715	48.6079	34.8084	34.8987	23.2661	23.1308	14.4721	14.2312	8.35889	8.00486
97.14	69.8801	69.8919	61.6493	61.561	48.55	48.6079	34.7801	34.8987	23.2283	23.1308	14.4529	14.2312	8.33055	8.00486
98.14	69.8514	69.8919	61.592	61.561	48.521	48.6079	34.7297	34.8987	23.1892	23.1308	14.4319	14.2312	8.28884	8.00486
99.14	69.8077	69.8919	61.5516	61.561	48.477	48.6079	34.7254	34.8987	23.1697	23.1308	14.4118	14.2312	8.26601	8.00486
100.14	69.7859	69.8919	61.5188	61.561	48.4627	48.6079	34.7151	34.8987	23.1567	23.1308	14.391	14.2312	8.26117	8.00486
101.14	69.7598	69.8919	61.4892	61.561	48.4436	48.6079	34.7093	34.8987	23.1564	23.1308	14.3863	14.2312	8.2521	8.00486
102.14	69.7091	69.8919	61.4684	61.561	48.4325	48.6079	34.6965	34.8987	23.1371	23.1308	14.3686	14.2312	8.24073	8.00486
103.14	69.6588	69.8919	61.4322	61.561	48.4068	48.6079	34.6648	34.8987	23.119	23.1308	14.343	14.2312	8.233	8.00486
104.14	69.6111	69.8919	61.418	61.561	48.3853	48.6079	34.6359	34.8987	23.0786	23.1308	14.326	14.2312	8.21964	8.00486
105.14	69.5512	69.8919	61.3915	61.561	48.3633	48.6079	34.615	34.8987	23.049	23.1308	14.3168	14.2312	8.19299	8.00486
106.14	69.5149	69.8919	61.3606	61.561	48.3236	48.6079	34.5745	34.8987	23.018	23.1308	14.2832	14.2312	8.15328	8.00486
107.14	69.4672	69.8919	61.3274	61.561	48.2956	48.6079	34.5334	34.8987	22.9963	23.1308	14.2786	14.2312	8.13032	8.00486
108.14	69.4259	69.8919	61.2802	61.561	48.2825	48.6079	34.5171	34.8987	22.9852	23.1308	14.2667	14.2312	8.12167	8.00486
109.14	69.3872	69.8919	61.2492	61.561	48.2678	48.6079	34.5008	34.8987	23.0044	23.1308	14.2704	14.2312	8.12046	8.00487
110.14	69.3399	69.8919	61.2279	61.561	48.2608	48.6079	34.4773	34.8987	23.0146	23.1308	14.2554	14.2312	8.10997	8.00487
111.14	69.3152	69.8919	61.2086	61.561	48.247	48.6079	34.4941	34.8987	22.9997	23.1308	14.2478	14.2312	8.10437	8.00487
112.14	69.2692	69.8919	61.2166	61.561	48.2429	48.6079	34.4948	34.8987	23.0064	23.1308	14.2643	14.2312	8.11678	8.00487
113.14	69.2359	69.8919	61.1989	61.561	48.2163	48.6079	34.4865	34.8987	22.9982	23.1308	14.2654	14.2312	8.10143	8.00487
114.14	69.2138	69.8919	61.1822	61.561	48.2013	48.6079	34.4897	34.8987	23.0032	23.1308	14.2586	14.2312	8.07983	8.00487
115.14	69.1628	69.8919	61.1837	61.561	48.1913	48.6079	34.4724	34.8987	22.9962	23.1308	14.2608	14.2312	8.07649	8.00487
116.14	69.1132	69.8919	61.1575	61.561	48.1745	48.6079	34.4513	34.8987	22.9782	23.1308	14.2178	14.2312	8.06119	8.00487
117.14	69.0883	69.8919	61.1298	61.561	48.1553	48.6079	34.4455	34.8987	22.9669	23.1308	14.2017	14.2312	8.04198	8.00487
118.14	69.0519	69.8919	61.1368	61.561	48.1526	48.6079	34.4123	34.8987	22.9672	23.1308	14.1796	14.2312	8.04085	8.00487
119.14	69.0181	69.8919	61.1068	61.561	48.1398	48.6079	34.3943	34.8987	22.9259	23.1308	14.1469	14.2312	8.01987	8.00487
120.14	68.991	69.8919	61.0989	61.561	48.1312	48.6079	34.3703	34.8987	22.9064	23.1308	14.1368	14.2312	8.01787	8.00487
121.14	68.9632	69.8919	61.0614	61.561	48.0932	48.6079	34.3582	34.8987	22.8904	23.1308	14.1269	14.2312	8.00295	8.00487
122.14	68.944	69.8919	61.0469	61.561	48.0904	48.6079	34.369	34.8987	22.8856	23.1308	14.1477	14.2312	8.00836	8.00487
123.14	68.9106	69.8919	61.0498	61.561	48.0915	48.6079	34.3478	34.8987	22.8786	23.1308	14.1501	14.2312	8.02736	8.00487
124.14	68.8851	69.8919	61.0289	61.561	48.0611	48.6079	34.3428	34.8987	22.8411	23.1308	14.1365	14.2312	8.01971	8.00487
125.14	68.8432	69.8919	61.0173	61.561	48.0414	48.6079	34.339	34.8987	22.825	23.1308	14.1274	14.2312	7.99057	8.00487
126.14	68.8176	69.8919	60.9797	61.561	48.0228	48.6079	34.3257	34.8987	22.7986	23.1308	14.1039	14.2312	7.96032	8.00487
127.14	68.7576	69.8919	60.9486	61.561	47.9901	48.6079	34.2864	34.8987	22.7775	23.1308	14.0647	14.2312	7.94753	8.00487
128.14	68.7104	69.8919	60.8899	61.561	47.9455	48.6079	34.2462	34.8987	22.7415	23.1308	14.0323	14.2312	7.90256	8.00487
129.14	68.6724	69.8919	60.8571	61.561	47.9226	48.6079	34.2049	34.8987	22.7368	23.1308	14.0049	14.2312	7.88632	8.00487
130.14	68.6415	69.8919	60.8079	61.561	47.8566	48.6079	34.1716	34.8987	22.7087	23.1308	13.9707	14.2312	7.86128	8.00487
131.14	68.5995	69.8919	60.759	61.561	47.8237	48.6079	34.1509	34.8987	22.6696	23.1308	13.9572	14.2312	7.83144	8.00487
132.14	68.5467	69.8919	60.7279	61.561	47.7905	48.6079	34.1136	34.8987	22.6368	23.1308	13.9334	14.2312	7.78164	8.00487
133.14	68.5245	69.8919	60.6986	61.561	47.7641	48.6079	34.0829	34.8987	22.5978	23.1308	13.9195	14.2312	7.73428	8.00487
134.14	68.4989	69.8919	60.6693	61.561	47.7302	48.6079	34.064	34.8987	22.5865	23.1308	13.8914	14.2312	7.70054	8.00487
135.14	68.4627	69.8919	60.6547	61.561	47.7359	48.6079	34.0481	34.8987	22.5536	23.1308	13.8677	14.2312	7.66707	8.00487
136.14	68.4255	69.8919	60.6299	61.561	47.7292	48.6079	34.0406	34.8987	22.5291	23.1308	13.8394	14.2312	7.63077	8.00487
137.14	68.4065	69.8919	60.609	61.561	47.7328	48.6079	34.0331	34.8987	22.4985	23.1308	13.8191	14.2312	7.59339	8.00487
138.14	68.399	69.8919	60.5876	61.561	47.7187	48.6079	34.0147	34.8987	22.4669	23.1308	13.7842	14.2312	7.57813	8.00487
139.14	68.3817	69.8919	60.5778	61.561	47.7213	48.6079	33.9883	34.8987	22.4477	23.1308	13.7771	14.2312	7.55908	8.00487
140.14	68.3446	69.8919	60.5583	61.561	47.7102	48.6079	33.9611	34.8987	22.4115	23.1308	13.7535	14.2312	7.52817	8.00487
141.14	68.3392	69.8919	60.5283	61.561	47.68	48.6079	33.9361	34.8987	22.3672	23.1308	13.727	14.2312	7.50817	8.00487
142.14	68.3215	69.8919	60.4974	61.561	47.6497	48.6079	33.9502	34.8987	22.3279	23.1308	13.6848	14.2312	7.4794	8.00487
143.14	68.2759	69.8919	60.4517	61.561	47.6205	48.6079	33.9507	34.8987	22.2891	23.1308	13.6367	14.2312	7.44038	8.00487
144.14	68.2286	69.8919	60.4192	61.561	47.59	48.6079	33.9352	34.8987	22.24	23.1308	13.5831	14.2312	7.39699	8.00487
145.14	68.1855	69.8919	60.3736	61.561	47.5534	48.6079	33.8915	34.8987	22.1895	23.1308	13.5347	14.2312	7.35851	8.00487
146.14	68.1398	69.8919	60.3375	61.561	47.5101	48.6079	33.8564	34.8987	22.1286	23.1308	13.4988	14.2312	7.29721	8.00487
147.14	68.1037	69.8919	60.3259	61.561	47.4996	48.6079	33.8292	34.8987	22.106	23.1308	13.4659	14.2312	7.26524	8.00487
148.14	68.0992	69.8919	60.3161	61.561	47.4907	48.6079	33.8059	34.8987	22.0603	23.1308	13.4498	14.2312	7.24858	8.00487
149.14	68.0769	69.8919	60.3263	61.561	47.4821	48.6079	33.7918	34.8987	22.0278	23.1308	13.4372	14.2312	7.22577	8.00487
150.14	68.0674	69.8919	60.3064	61.561	47.4706	48.6079	33.7906	34.8987	21.9849	23.1308	13.4296	14.2312	7.21523	8.00487
151.14	68.0438	69.8919	60.3146	61.561	47.4603	48.6079	33.779	34.8987	21.9752	23.1308	13.4137	14.2312	7.2051	8.00487
152.14	68.023	69.8919	60.3083	61.561	47.4504	48.6079	33.7767	34.8987	21.9559	23.1308	13.3945	14.2312	7.16565	8.00487
153.14	67.9852	69.8919	60.2884	61.561	47.4265	48.6079	33.779	34.8987	21.9161	23.1308	13.3601	14.2312	7.14338	8.00487
154.14	67.9559	69.8919	60.2754	61.561	47.4176	48.6079	33.7745	34.8987	21.8657	23.1308	13.3239	14.2312	7.1148	8.00487
155.14	67.9249	69.8919	60.2572	61.561	47.4068	48.6079	33.7496	34.8987	21.8326	23.1308	13.2799	14.2312	7.07631	8.00487
156.14	67.8681	69.8919	60.2348	61.561	47.3839	48.6079	33.7245	34.8987	21.7957	23.1308	13.2314	14.2312	7.02413	8.00487
157.14	67.8365	69.8919	60.195	61.561	47.3564	48.6079	33.7181	34.8987	21.7349	23.1308	13.1725	14.2312	6.96543	8.00487
158.14	67.8238	69.8919	60.1791	61.561	47.33	48.6079	33.6909	34.8987	21.6975	23.1308	13.1306	14.2312	6.91783	8.00487
159.14	67.797	69.8919	60.1645	61.561	47.2978	48.6079	33.6887	34.8987	21.6469	23.1308	13.101	14.2312	6.87744	8.00487
160.14	67.7863	69.8919	60.1591	61.561	47.2793	48.6079	33.681	34.8987	21.6091	23.1308	13.0727	14.2312	6.83949	8.00487
161.14	67.7587	69.8919	60.1482	61.561	47.2606	48.6079	33.6729	34.8987	21.5767	23.1308	13.0288	14.2312	6.82535	8.00487
162.14	67.7375	69.8919	60.1348	61.561	47.2279	48.6079	33.6527	34.8987	21.5258	23.1308	12.9867	14.2312	6.77797	8.00487
163.14	67.6982	69.8919	60.1185	61.561	47.1997	48.6079	33.6221	34.8987	21.4865	23.1308	12.9387	14.2312	6.73551	8.00487
164.14	67.6703	69.8919	60.0791	61.561	47.178	48.6079	33.5867	34.8987	21.4361	23.1308	12.8758	14.2312	6.6921	8.00487
165.14	67.6317	69.8919	60.0305	61.561	47.1616	48.6079	33.55	34.8987	21.3954	23.1308	12.816	14.2312	6.63492	8.00487
166.14	67.5952	69.8919	59.9993	61.561	47.1225	48.6079	33.5295	34.8987	21.338	23.1308	12.7728	14.2312	6.58778	8.00487
167.14	67.5661	69.8919	59.9961	61.561	47.1117	48.6079	33.5111	34.8987	21.3071	23.1308	12.7168	14.2312	6.53471	8.00487
168.14	67.5282	69.8919	59.9763	61.561	47.0873	48.6079	33.4992	34.8987	21.227	23.1308	12.6441	14.2312	6.47249	8.00487
169.14	67.4922	69.8919	59.9486	61.561	47.0506	48.6079	33.4953	34.8987	21.1435	23.1308	12.5586	14.2312	6.39515	8.00487
170.14	67.4828	69.8919	59.9357	61.561	47.0544	48.6079	33.4864	34.8987	21.0814	23.1308	12.4928	14.2312	6.31061	8.00487
171.14	67.4658	69.8919	59.9142	61.561	47.0351	48.6079	33.4776	34.8987	20.9997	23.1308	12.4108	14.2312	6.22772	8.00487
172.14	67.4338	69.8919	59.8965	61.561	47.0234	48.6079	33.4587	34.8987	20.9704	23.1308	12.4341	14.2312	6.20621	8.00487
173.14	67.4093	69.8919	59.8584	61.561	47.0071	48.6079	33.4624	34.8987	21.0029	23.1308	12.5043	14.2312	6.25018	8.00487
174.14	67.3805	69.8919	59.8673	61.561	46.9939	48.6079	33.4301	34.8987	21.1032	23.1308	12.6084	14.2312	6.34823	8.00487
175.14	67.3283	69.8919	59.8293	61.561	46.9561	48.6079	33.3982	34.8987	21.1829	23.1308	12.6983	14.2312	6.45566	8.00487
176.14	67.273	69.8919	59.7704	61.561	46.9068	48.6079	33.3608	34.8987	21.2075	23.1308	12.7603	14.2312	6.5112	8.00487
177.14	67.2494	69.8919	59.7361	61.561	46.8736	48.6079	33.3227	34.8987	21.2529	23.1308	12.8139	14.2312	6.55957	8.00487
178.14	67.2747	69.8919	59.6789	61.561	46.8578	48.6079	33.2935	34.8987	21.2954	23.1308	12.852	14.2312	6.593	8.00487
179.14	67.0363	69.8919	59.6708	61.561	46.8371	48.6079	33.0532	34.8987	21.379	23.1308	12.7989	14.2312	6.63238	8.00487
180.14	68.9048	68.5079	59.469	61.561	47.874	48.6079	35.522	34.8987	21.1624	23.1308	15.7785	14.2312	7.60538	8.00487
181.14	58.7194	59.4755	58.8676	57.9147	43.9164	45.649	27.652	29.9298	20.6586	21.0124	8.89773	11.4899	5.09019	6.50547
182.14	52.1364	51.6332	51.1003	50.2782	39.7169	39.6298	26.3121	25.9833	17.9888	18.2418	10.4644	9.97484	5.42117	5.64767
183.14	45.5226	44.8249	45.0897	43.6486	35.1285	34.4043	23.3803	22.5572	16.4894	15.8365	9.56392	8.65957	5.10033	4.90298
184.14	39.7435	38.9144	39.572	37.8932	30.9343	29.8678	20.5323	19.5828	14.5555	13.7483	8.4988	7.51774	4.51401	4.25648
185.14	34.609	33.7832	34.6041	32.8967	27.1608	25.9295	17.9642	17.0007	12.7579	11.9355	7.45542	6.52647	3.86944	3.69523
186.14	30.1406	29.3286	30.2904	28.559	23.8281	22.5105	15.6846	14.759	11.088	10.3617	6.50466	5.6659	3.25734	3.20798
187.14	26.2077	25.4614	26.4963	24.7932	20.9184	19.5423	13.6614	12.8129	9.65332	8.99541	5.59701	4.9188	2.7008	2.78499
188.14	22.7991	22.1041	23.2037	21.5241	18.3199	16.9655	11.8922	11.1234	8.35754	7.80929	4.85259	4.27022	2.21991	2.41776
189.14	19.7822	19.1895	20.356	18.6859	16.0728	14.7285	10.3497	9.65672	7.26457	6.77958	4.1858	3.70716	1.83221	2.09896
190.14	17.1556	16.6592	17.7904	16.222	14.0686	12.7864	8.96407	8.3834	6.26614	5.88563	3.629	3.21834	1.47046	1.82219
191.14	14.8162	14.4626	15.5583	14.083	12.2953	11.1004	7.7391	7.27798	5.42278	5.10957	3.08603	2.79398	1.16245	1.58192
192.14	12.7352	12.5556	13.5517	12.2261	10.7412	9.63673	6.66325	6.31832	4.6173	4.43583	2.6222	2.42557	0.877835	1.37333
193.14	10.8923	10.9	11.81	10.614	9.35488	8.36605	5.66302	5.4852	3.92317	3.85093	2.21979	2.10574	0.625582	1.19224
194.14	9.29149	9.46276	10.2575	9.21443	8.12483	7.26292	4.78555	4.76193	3.27434	3.34315	1.86681	1.82807	0.392021	1.03503
195.14	7.86375	8.21502	8.84074	7.99944	7.01335	6.30524	4.0247	4.13404	2.72356	2.90233	1.54431	1.58702	0.192646	0.89855
196.14	6.57717	7.1318	7.60684	6.94465	6.09363	5.47385	3.36307	3.58893	2.26106	2.51964	1.24559	1.37776	0.0134802	0.780067
197.14	5.43752	6.19142	6.52245	6.02894	5.20658	4.75208	2.79405	3.1157	1.86269	2.1874	0.99787	1.19609	-0.133651	0.677207
198.14	4.37907	5.37503	5.51262	5.23398	4.43554	4.12548	2.25384	2.70487	1.48215	1.89898	0.781499	1.03837	-0.266019	0.587911
199.14	3.54445	4.66629	4.63175	4.54383	3.7298	3.5815	1.75075	2.34821	1.12746	1.64858	0.576103	0.901451	-0.374893	0.510388
200.14	2.66086	4.051	3.87199	3.94469	3.14468	3.10925	1.32524	2.03858	0.812225	1.43119	0.400085	0.782585	-0.488136	0.443089
201.14	1.91219	3.51684	3.19386	3.42455	2.58921	2.69927	0.98477	1.76977	0.536057	1.24248	0.228916	0.679393	-0.595867	0.384663
202.14	1.26492	3.05312	2.55285	2.973	2.09534	2.34335	0.657234	1.53641	0.303635	1.07864	0.0757141	0.589808	-0.707001	0.333941
203.14	0.650934	2.65054	2.00402	2.58099	1.67206	2.03436	0.342306	1.33382	0.0946503	0.936413	-0.052494	0.512036	-0.788876	0.289907
204.14	0.108276	2.30105	1.49589	2.24066	1.28733	1.76611	0.0621109	1.15794	-0.111214	0.812938	-0.184761	0.444519	-0.875954	0.25168
205.14	-0.371873	1.99763	1.03878	1.94521	0.936978	1.53323	-0.144256	1.00525	-0.300667	0.705743	-0.300618	0.385904	-0.937243	0.218494
206.14	-0.798361	1.73423	0.607536	1.68872	0.625187	1.33106	-0.368242	0.872702	-0.442848	0.612684	-0.416553	0.335019	-0.989658	0.189683
207.14	-1.16891	1.50555	0.226669	1.46604	0.337837	1.15554	-0.567535	0.757627	-0.573326	0.531895	-0.499527	0.290843	-1.03482	0.164671
208.14	-1.52483	1.30703	-0.0967636	1.27273	0.102529	1.00317	-0.754951	0.657726	-0.676445	0.461759	-0.549367	0.252493	-1.05294	0.142958
209.14	-1.84093	1.13468	-0.363159	1.10491	-0.125938	0.870895	-0.939438	0.570998	-0.776123	0.400872	-0.607796	0.219199	-1.07204	0.124107
210.14	-2.10742	0.985064	-0.585426	0.959213	-0.323557	0.756059	-1.07003	0.495706	-0.895576	0.348013	-0.655302	0.190295	-1.09817	0.107742
211.14	-2.36202	0.855173	-0.798012	0.832731	-0.500399	0.656364	-1.19702	0.430342	-0.970978	0.302124	-0.698584	0.165203	-1.10509	0.0935355
212.14	-2.58337	0.74241	-1.02879	0.722927	-0.682804	0.569816	-1.30119	0.373597	-1.05925	0.262286	-0.757534	0.143419	-1.13906	0.0812019
213.14	-2.79334	0.644515	-1.22637	0.627602	-0.835093	0.49468	-1.40145	0.324335	-1.15215	0.2277	-0.806035	0.124508	-1.17525	0.0704946
214.14	-2.98148	0.559529	-1.39793	0.544846	-0.976368	0.429451	-1.49753	0.281568	-1.21745	0.197676	-0.859203	0.10809	-1.20028	0.0611992
215.14	-3.13632	0.48575	-1.55457	0.473002	-1.10325	0.372824	-1.58214	0.24444	-1.27449	0.17161	-0.896707	0.0938374	-1.22786	0.0531294
216.14	-3.2921	0.421699	-1.68699	0.410632	-1.21578	0.323663	-1.6535	0.212208	-1.30886	0.148982	-0.926544	0.081464	-1.26031	0.0461238
217.14	-3.43038	0.366093	-1.79636	0.356486	-1.32457	0.280985	-1.72713	0.184226	-1.36472	0.129337	-0.951547	0.0707221	-1.28082	0.0400419
218.14	-3.53828	0.31782	-1.90762	0.30948	-1.40461	0.243934	-1.77648	0.159934	-1.39714	0.112283	-0.974441	0.0613967	-1.31008	0.0347619
219.14	-3.6514	0.275912	-2.00887	0.268672	-1.47637	0.211769	-1.83073	0.138845	-1.41863	0.0974769	-0.985304	0.0533009	-1.31661	0.0301782
220.14	-3.78032	0.23953	-2.09676	0.233245	-1.53671	0.183845	-1.87931	0.120537	-1.44792	0.0846236	-1.00402	0.0462726	-1.34297	0.0261989
221.14	-3.86725	0.207946	-2.18536	0.202489	-1.59572	0.159603	-1.91544	0.104643	-1.48418	0.0734651	-1.01643	0.0401711	-1.35939	0.0227443
222.14	-3.92727	0.180526	-2.23739	0.175789	-1.63716	0.138558	-1.94199	0.0908448	-1.50465	0.063778	-1.01015	0.0348741	-1.35505	0.0197452
223.14	-4.00461	0.156722	-2.28817	0.152609	-1.68962	0.120288	-1.9457	0.078866	-1.52801	0.0553682	-1.00976	0.0302756	-1.33533	0.0171416
224.14	-4.07288	0.136056	-2.32723	0.132486	-1.73985	0.104426	-1.98874	0.0684667	-1.53777	0.0480673	-1.02358	0.0262835	-1.32501	0.0148813
225.14	-4.14171	0.118116	-2.36511	0.115016	-1.78902	0.0906567	-2.02792	0.0594386	-1.56745	0.0417292	-1.02538	0.0228177	-1.3316	0.0129191
226.14	-4.19079	0.102541	-2.42378	0.0998503	-1.84745	0.0787027	-2.05771	0.0516011	-1.58542	0.0362267	-1.03097	0.019809	-1.333	0.0112156
227.14	-4.25826	0.0890201	-2.47481	0.086684	-1.89439	0.0683249	-2.08504	0.0447969	-1.61465	0.0314499	-1.04588	0.017197	-1.34088	0.00974
228.14	-4.33538	0.0772819	-2.53503	0.0752538	-1.9375	0.0593156	-2.11374	0.03889	-1.64526	0.0273029	-1.08022	0.0149294	-1.36094	0.00845
229.14	-4.40008	0.0670915	-2.59402	0.0653309	-1.99579	0.0514942	-2.15492	0.0337619	-1.67527	0.0237027	-1.11687	0.0129608	-1.3997	0.00734
230.14	-4.44202	0.0582448	-2.64598	0.0567163	-2.03837	0.0447042	-2.17819	0.0293101	-1.7159	0.0205773	-1.13609	0.0112518	-1.43087	0.00637
231.14	-4.48898	0.0505646	-2.68542	0.0492377	-2.04938	0.0388095	-2.20467	0.0254453	-1.73386	0.0178639	-1.13827	0.00977	-1.42555	0.00553
232.14	-4.52343	0.0438972	-2.73433	0.0427452	-2.07707	0.0336921	-2.213	0.02209	-1.74675	0.0155084	-1.14983	0.00848	-1.43997	0.0048
233.14	-4.55532	0.0381089	-2.74754	0.0371088	-2.08985	0.0292494	-2.20275	0.0191772	-1.74871	0.0134635	-1.14972	0.00736	-1.43321	0.00417
234.14	-4.57294	0.0330838	-2.75566	0.0322156	-2.09755	0.0253926	-2.21735	0.0166485	-1.73691	0.0116882	-1.14095	0.00639	-1.42294	0.00362
235.14	-4.59054	0.0287214	-2.78347	0.0279677	-2.10895	0.0220443	-2.2369	0.0144532	-1.74519	0.010147	-1.14264	0.00555	-1.41286	0.00314
236.14	-4.62765	0.0249342	-2.81433	0.0242798	-2.12613	0.0191375	-2.25651	0.0125474	-1.74675	0.00881	-1.17537	0.00482	-1.41246	0.00273
237.14	-4.66085	0.0216463	-2.85183	0.0210783	-2.16441	0.0166141	-2.26815	0.0108929	-1.76472	0.00765	-1.19178	0.00418	-1.42926	0.00237
238.14	-4.69913	0.0187921	-2.87292	0.0182989	-2.17945	0.0144233	-2.29296	0.00946	-1.79409	0.00664	-1.21834	0.00363	-1.43141	0.00206
239.14	-4.7147	0.0163141	-2.90582	0.015886	-2.20718	0.0125215	-2.30853	0.00821	-1.83542	0.00576	-1.24136	0.00315	-1.43101	0.00178
240.14	-4.71451	0.0141629	-2.92754	0.0137913	-2.22403	0.0108704	-2.3211	0.00713	-1.83534	0.005	-1.23916	0.00274	-1.44013	0.00155
241.14	-4.70977	0.0122954	-2.92527	0.0119728	-2.23438	0.00944	-2.32843	0.00619	-1.82644	0.00434	-1.23577	0.00238	-1.42922	0.00134
242.14	-4.71571	0.0106741	-2.92879	0.010394	-2.22938	0.00819	-2.32947	0.00537	-1.81043	0.00377	-1.22348	0.00206	-1.43251	0.00117
243.14	-4.72427	0.00927	-2.92558	0.00902	-2.22853	0.00711	-2.35067	0.00466	-1.81902	0.00327	-1.23166	0.00179	-1.44931	0.00101
244.14	-4.74242	0.00804	-2.95621	0.00783	-2.23692	0.00617	-2.36003	0.00405	-1.80066	0.00284	-1.24944	0.00155	-1.48106	0.00088
245.14	-4.75611	0.00698	-2.96981	0.0068	-2.24691	0.00536	-2.35404	0.00351	-1.81082	0.00247	-1.25895	0.00135	-1.51051	0.000764
246.14	-4.77514	0.00606	-2.96817	0.0059	-2.24373	0.00465	-2.37845	0.00305	-1.80098	0.00214	-1.25886	0.00117	-1.52342	0.000663
247.14	-4.79226	0.00526	-3.00223	0.00513	-2.2661	0.00404	-2.39086	0.00265	-1.83347	0.00186	-1.28366	0.00102	-1.54892	0.000576
248.14	-4.80921	0.00457	-3.00536	0.00445	-2.27989	0.00351	-2.39753	0.0023	-1.84012	0.00161	-1.28882	0.000883	-1.54278	0.0005
249.14	-4.82101	0.00397	-3.02527	0.00386	-2.2984	0.00304	-2.39901	0.002	-1.84675	0.0014	-1.27694	0.000766	-1.55035	0.000434
250.14	-4.82257	0.00344	-3.03347	0.00335	-2.29039	0.00264	-2.39842	0.00173	-1.83855	0.00122	-1.26287	0.000665	-1.53219	0.000377
251.14	-4.83695	0.00299	-3.03511	0.00291	-2.29239	0.00229	-2.41316	0.0015	-1.83698	0.00106	-1.27124	0.000578	-1.53418	0.000327
252.14	-4.85976	0.0026	-3.06473	0.00253	-2.30778	0.00199	-2.43495	0.00131	-1.84519	0.000917	-1.30272	0.000501	-1.55153	0.000284
253.14	-4.8882	0.00225	-3.06473	0.00219	-2.3193	0.00173	-2.43515	0.00113	-1.84519	0.000796	-1.30546	0.000435	-1.5693	0.000246
254.14	-4.90727	0.00196	-3.07449	0.0019	-2.33009	0.0015	-2.45047	0.000984	-1.8448	0.000691	-1.31734	0.000378	-1.58173	0.000214
255.14	-4.91374	0.0017	-3.09247	0.00165	-2.34638	0.0013	-2.45003	0.000855	-1.87137	0.0006	-1.33874	0.000328	-1.61005	0.000186
256.14	-4.91398	0.00147	-3.08582	0.00144	-2.33961	0.00113	-2.45077	0.000742	-1.87761	0.000521	-1.34264	0.000285	-1.6193	0.000161
257.14	-4.9225	0.00128	-3.08582	0.00125	-2.33047	0.000982	-2.4571	0.000644	-1.87769	0.000452	-1.34741	0.000247	-1.62344	0.00014
258.14	-4.93509	0.00111	-3.09051	0.00108	-2.3382	0.000853	-2.46001	0.000559	-1.88621	0.000393	-1.35527	0.000215	-1.63898	0.000122
259.14	-4.90577	0.000965	-3.10535	0.000939	-2.34126	0.00074	-2.46903	0.000485	-1.89745	0.000341	-1.35369	0.000186	-1.62408	0.000106
260.14	-4.90578	0.000837	-3.10497	0.000815	-2.33825	0.000643	-2.46504	0.000421	-1.90691	0.000296	-1.35038	0.000162	-1.62927	9.16e-05
261.14	-4.885	0.000727	-3.09559	0.000708	-2.3295	0.000558	-2.45964	0.000366	-1.89715	0.000257	-1.33491	0.00014	-1.61388	7.95e-05
262.14	-4.88734	0.000631	-3.09363	0.000615	-2.34141	0.000484	-2.48288	0.000318	-1.89558	0.000223	-1.34858	0.000122	-1.6125	6.9e-05
263.14	-4.89758	0.000548	-3.11356	0.000534	-2.35017	0.000421	-2.48398	0.000276	-1.93347	0.000194	-1.37225	0.000106	-1.62985	5.99e-05
264.14	-4.89413	0.000476	-3.13309	0.000463	-2.33716	0.000365	-2.47433	0.000239	-1.94441	0.000168	-1.38702	9.19e-05	-1.6377	5.2e-05
265.14	-4.88187	0.000413	-3.11668	0.000402	-2.31934	0.000317	-2.4698	0.000208	-1.91862	0.000146	-1.37436	7.98e-05	-1.6502	4.52e-05
266.14	-4.89406	0.000358	-3.10535	0.000349	-2.31817	0.000275	-2.48152	0.00018	-1.91512	0.000127	-1.37906	6.93e-05	-1.65372	3.92e-05
267.14	-4.91335	0.000311	-3.12138	0.000303	-2.33486	0.000239	-2.4807	0.000157	-1.93309	0.00011	-1.38991	6.01e-05	-1.66845	3.4e-05
268.14	-4.90336	0.00027	-3.12652	0.000263	-2.31934	0.000207	-2.4698	0.000136	-1.93464	9.55e-05	-1.38413	5.22e-05	-1.67129	2.96e-05
269.14	-4.9039	0.000235	-3.11512	0.000228	-2.32493	0.00018	-2.47803	0.000118	-1.93472	8.29e-05	-1.37288	4.53e-05	-1.66829	2.57e-05
270.14	-4.9046	0.000204	-3.0991	0.000198	-2.3277	0.000156	-2.48885	0.000102	-1.93034	7.19e-05	-1.37499	3.93e-05	-1.65348	2.23e-05
271.14	-4.90297	0.000177	-3.09558	0.000172	-2.33692	0.000136	-2.50573	8.9e-05	-1.93503	6.25e-05	-1.37905	3.42e-05	-1.65098	1.93e-05
272.14	-4.88665	0.000153	-3.09246	0.000149	-2.3386	0.000118	-2.50103	7.72e-05	-1.94324	5.42e-05	-1.37832	2.96e-05	-1.65773	1.68e-05
273.14	-4.87053	0.000133	-3.07597	0.00013	-2.33724	0.000102	-2.50735	6.7e-05	-1.94472	4.71e-05	-1.38252	2.57e-05	-1.6513	1.46e-05
274.14	-4.88124	0.000116	-3.07098	0.000113	-2.34583	8.88e-05	-2.50792	5.82e-05	-1.95269	4.09e-05	-1.3803	2.23e-05	-1.65997	1.27e-05
275.14	-4.89288	0.0001	-3.08394	9.78e-05	-2.33766	7.71e-05	-2.50155	5.05e-05	-1.95769	3.55e-05	-1.38202	1.94e-05	-1.67164	1.1e-05
276.14	-4.88344	8.72e-05	-3.07605	8.49e-05	-2.33731	6.69e-05	-2.48113	4.39e-05	-1.96784	3.08e-05	-1.38218	1.68e-05	-1.68106	9.53e-06
277.14	-4.89953	7.57e-05	-3.07449	7.37e-05	-2.33434	5.81e-05	-2.4873	3.81e-05	-1.9659	2.67e-05	-1.36171	1.46e-05	-1.69762	8.28e-06
278.14	-4.90265	6.57e-05	-3.05457	6.4e-05	-2.35415	5.04e-05	-2.48828	3.31e-05	-1.9659	2.32e-05	-1.35077	1.27e-05	-1.70095	7.19e-06
279.14	-4.89804	5.7e-05	-3.05496	5.55e-05	-2.33704	4.38e-05	-2.47335	2.87e-05	-1.96785	2.02e-05	-1.34866	1.1e-05	-1.69837	6.24e-06
280.14	-4.88507	4.95e-05	-3.03816	4.82e-05	-2.31696	3.8e-05	-2.46405	2.49e-05	-1.94949	1.75e-05	-1.33983	9.57e-06	-1.69977	5.42e-06
281.14	-4.88219	4.3e-05	-3.01707	4.19e-05	-2.31469	3.3e-05	-2.46656	2.16e-05	-1.92683	1.52e-05	-1.34139	8.3e-06	-1.68071	4.7e-06
282.14	-4.87344	3.73e-05	-3.02216	3.63e-05	-2.31595	2.86e-05	-2.46046	1.88e-05	-1.93348	1.32e-05	-1.33773	7.21e-06	-1.68705	4.08e-06
283.14	-4.88281	3.24e-05	-3.02215	3.15e-05	-2.297	2.49e-05	-2.43917	1.63e-05	-1.9155	1.14e-05	-1.34124	6.26e-06	-1.67786	3.54e-06
284.14	-4.86742	2.81e-05	-3.02683	2.74e-05	-2.27793	2.16e-05	-2.43972	1.42e-05	-1.89714	9.94e-06	-1.33999	5.43e-06	-1.68816	3.08e-06
285.14	-4.86398	2.44e-05	-3.01395	2.38e-05	-2.27575	1.87e-05	-2.42675	1.23e-05	-1.90417	8.63e-06	-1.3246	4.72e-06	-1.67145	2.67e-06
286.14	-4.87641	2.12e-05	-3.01238	2.06e-05	-2.26934	1.63e-05	-2.43113	1.07e-05	-1.91355	7.49e-06	-1.33804	4.09e-06	-1.67169	2.32e-06
287.14	-4.89062	1.84e-05	-3.03004	1.79e-05	-2.27513	1.41e-05	-2.45207	9.26e-06	-1.93309	6.5e-06	-1.3639	3.55e-06	-1.68919	2.01e-06
288.14	-4.87961	1.6e-05	-3.04168	1.56e-05	-2.28649	1.23e-05	-2.47421	8.04e-06	-1.94637	5.64e-06	-1.37538	3.09e-06	-1.70993	1.75e-06
289.14	-4.89594	1.39e-05	-3.05145	1.35e-05	-2.30508	1.06e-05	-2.49109	6.98e-06	-1.96238	4.9e-06	-1.38921	2.68e-06	-1.70431	1.52e-06
290.14	-4.91195	1.2e-05	-3.07927	1.17e-05	-2.32579	9.24e-06	-2.52429	6.06e-06	-1.99371	4.25e-06	-1.4189	2.33e-06	-1.70197	1.32e-06
291.14	-4.91179	1.05e-05	-3.10886	1.02e-05	-2.35094	8.02e-06	-2.52796	5.26e-06	-2.03152	3.69e-06	-1.44694	2.02e-06	-1.72586	1.14e-06
292.14	-4.93344	9.07e-06	-3.09402	8.84e-06	-2.34786	6.96e-06	-2.54051	4.57e-06	-2.03465	3.21e-06	-1.44741	1.75e-06	-1.73185	9.93e-07
293.14	-4.93008	7.88e-06	-3.10848	7.67e-06	-2.36224	6.05e-06	-2.52707	3.96e-06	-2.06239	2.78e-06	-1.45843	1.52e-06	-1.75638	8.62e-07
294.14	-4.93195	6.84e-06	-3.1034	6.66e-06	-2.3654	5.25e-06	-2.52734	3.44e-06	-2.07019	2.42e-06	-1.46022	1.32e-06	-1.75954	7.48e-07
295.14	-4.9382	5.94e-06	-3.09364	5.78e-06	-2.36462	4.56e-06	-2.53124	2.99e-06	-2.06551	2.1e-06	-1.47343	1.15e-06	-1.76189	6.49e-07
296.14	-4.91523	5.15e-06	-3.10184	5.02e-06	-2.38509	3.96e-06	-2.53663	2.59e-06	-2.07332	1.82e-06	-1.46429	9.96e-07	-1.78743	5.64e-07
297.14	-4.90265	4.47e-06	-3.10339	4.36e-06	-2.38668	3.43e-06	-2.54909	2.25e-06	-2.07526	1.58e-06	-1.47303	8.64e-07	-1.79059	4.89e-07
298.14	-4.90101	3.88e-06	-3.10496	3.78e-06	-2.37754	2.98e-06	-2.56433	1.95e-06	-2.06863	1.37e-06	-1.49311	7.5e-07	-1.78965	4.25e-07
299.14	-4.90929	3.37e-06	-3.11324	3.28e-06	-2.38669	2.59e-06	-2.56738	1.7e-06	-2.06394	1.19e-06	-1.50077	6.51e-07	-1.8184	3.69e-07
300.14	-4.91906	2.93e-06	-3.10379	2.85e-06	-2.3734	2.25e-06	-2.58339	1.47e-06	-2.05222	1.03e-06	-1.49062	5.66e-07	-1.82653	3.2e-07
301.14	-4.90227	2.54e-06	-3.10184	2.47e-06	-2.36383	1.95e-06	-2.58632	1.28e-06	-2.05222	8.98e-07	-1.4914	4.91e-07	-1.83649	2.78e-07
302.14	-4.91249	2.21e-06	-3.09402	2.15e-06	-2.36282	1.69e-06	-2.58897	1.11e-06	-2.06558	7.8e-07	-1.48577	4.26e-07	-1.84524	2.41e-07
303.14	-4.92093	1.92e-06	-3.07566	1.87e-06	-2.35703	1.47e-06	-2.58835	9.64e-07	-2.0655	6.77e-07	-1.4728	3.7e-07	-1.8411	2.1e-07
304.14	-4.90585	1.66e-06	-3.06473	1.62e-06	-2.34485	1.28e-06	-2.58116	8.37e-07	-2.0659	5.88e-07	-1.45999	3.21e-07	-1.83071	1.82e-07
305.14	-4.8875	1.44e-06	-3.05457	1.41e-06	-2.33782	1.11e-06	-2.58078	7.27e-07	-2.07722	5.1e-07	-1.46272	2.79e-07	-1.82337	1.58e-07
306.14	-4.87562	1.25e-06	-3.06629	1.22e-06	-2.35067	9.62e-07	-2.57097	6.31e-07	-2.09012	4.43e-07	-1.45601	2.42e-07	-1.82482	1.37e-07
307.14	-4.86267	1.09e-06	-3.0659	1.06e-06	-2.34804	8.35e-07	-2.55236	5.48e-07	-2.08698	3.84e-07	-1.45675	2.1e-07	-1.82383	1.19e-07
308.14	-4.86131	9.45e-07	-3.04473	9.2e-07	-2.33736	7.25e-07	-2.54559	4.75e-07	-2.0834	3.34e-07	-1.44627	1.82e-07	-1.82096	1.03e-07
309.14	-4.84047	8.2e-07	-3.05261	7.99e-07	-2.34649	6.29e-07	-2.55124	4.13e-07	-2.0948	2.9e-07	-1.45444	1.58e-07	-1.8418	8.97e-08
310.14	-4.83039	7.12e-07	-3.06246	6.93e-07	-2.34743	5.46e-07	-2.55663	3.58e-07	-2.11433	2.52e-07	-1.45038	1.38e-07	-1.84938	7.79e-08
311.14	-4.85342	6.18e-07	-3.05457	6.02e-07	-2.34943	4.74e-07	-2.56993	3.11e-07	-2.11277	2.18e-07	-1.44901	1.19e-07	-1.84943	6.76e-08
312.14	-4.8797	5.37e-07	-3.07262	5.22e-07	-2.36309	4.12e-07	-2.56107	2.7e-07	-2.13246	1.9e-07	-1.45543	1.04e-07	-1.86661	5.87e-08
313.14	-4.9057	4.66e-07	-3.04481	4.54e-07	-2.34142	3.58e-07	-2.57312	2.34e-07	-2.11629	1.65e-07	-1.46812	9e-08	-1.86922	5.09e-08
314.14	-4.92039	4.04e-07	-3.06317	3.94e-07	-2.34615	3.1e-07	-2.57824	2.03e-07	-2.12645	1.43e-07	-1.49827	7.81e-08	-1.88919	4.42e-08
315.14	-4.92577	3.51e-07	-3.05301	3.42e-07	-2.33684	2.69e-07	-2.59386	1.77e-07	-2.12292	1.24e-07	-1.50647	6.78e-08	-1.88645	3.84e-08
316.14	-4.93103	3.05e-07	-3.04675	2.97e-07	-2.3162	2.34e-07	-2.581	1.53e-07	-2.10847	1.08e-07	-1.51144	5.89e-08	-1.87246	3.33e-08
317.14	-4.93327	2.65e-07	-3.0334	2.58e-07	-2.30693	2.03e-07	-2.58087	1.33e-07	-2.09668	9.35e-08	-1.51338	5.11e-08	-1.87755	2.89e-08
318.14	-4.92375	2.3e-07	-3.03661	2.24e-07	-2.30661	1.76e-07	-2.57988	1.16e-07	-2.09168	8.11e-08	-1.52187	4.44e-08	-1.8902	2.51e-08
319.14	-4.90453	1.99e-07	-3.03465	1.94e-07	-2.30665	1.53e-07	-2.58999	1e-07	-2.09637	7.04e-08	-1.53335	3.85e-08	-1.88165	2.18e-08
320.14	-4.89164	1.73e-07	-3.0448	1.69e-07	-2.30488	1.33e-07	-2.58737	8.71e-08	-2.09675	6.12e-08	-1.53296	3.34e-08	-1.89168	1.89e-08
321.14	-4.89257	1.5e-07	-3.03504	1.46e-07	-2.29211	1.15e-07	-2.5714	7.56e-08	-2.10496	5.31e-08	-1.53967	2.9e-08	-1.89251	1.64e-08
322.14	-4.88187	1.3e-07	-3.0284	1.27e-07	-2.31473	1e-07	-2.56784	6.57e-08	-2.11628	4.61e-08	-1.5392	2.52e-08	-1.90332	1.43e-08
323.14	-4.8768	1.13e-07	-3.03348	1.1e-07	-2.31563	8.69e-08	-2.58289	5.7e-08	-2.12457	4e-08	-1.54476	2.19e-08	-1.91251	1.24e-08
324.14	-4.88086	9.83e-08	-3.03153	9.57e-08	-2.31517	7.55e-08	-2.58585	4.95e-08	-2.15067	3.47e-08	-1.56117	1.9e-08	-1.92845	1.08e-08
325.14	-4.88742	8.54e-08	-3.03512	8.31e-08	-2.31676	6.55e-08	-2.58261	4.3e-08	-2.1655	3.02e-08	-1.5789	1.65e-08	-1.94137	9.34e-09
326.14	-4.91054	7.41e-08	-3.05145	7.22e-08	-2.34446	5.69e-08	-2.58273	3.73e-08	-2.203	2.62e-08	-1.60179	1.43e-08	-1.9511	8.11e-09
327.14	-4.91241	6.43e-08	-3.06472	6.26e-08	-2.35582	4.94e-08	-2.5787	3.24e-08	-2.19792	2.27e-08	-1.59725	1.24e-08	-1.96246	7.04e-09
328.14	-4.93617	5.59e-08	-3.06277	5.44e-08	-2.35996	4.29e-08	-2.60105	2.81e-08	-2.20612	1.97e-08	-1.61538	1.08e-08	-1.98145	6.11e-09
329.14	-4.93	4.85e-08	-3.0941	4.72e-08	-2.3779	3.72e-08	-2.61484	2.44e-08	-2.22566	1.71e-08	-1.62889	9.37e-09	-2.02048	5.3e-09
330.14	-4.93353	4.21e-08	-3.10379	4.1e-08	-2.38418	3.23e-08	-2.61177	2.12e-08	-2.23386	1.49e-08	-1.61894	8.13e-09	-2.03996	4.6e-09
331.14	-4.91474	3.65e-08	-3.08926	3.56e-08	-2.36943	2.8e-08	-2.60133	1.84e-08	-2.22565	1.29e-08	-1.61049	7.06e-09	-2.03115	4e-09
332.14	-4.90882	3.17e-08	-3.0741	3.09e-08	-2.35801	2.43e-08	-2.62136	1.6e-08	-2.20769	1.12e-08	-1.60601	6.13e-09	-2.02012	3.47e-09
333.14	-4.8946	2.75e-08	-3.08426	2.68e-08	-2.36634	2.11e-08	-2.61202	1.39e-08	-2.20457	9.73e-09	-1.59866	5.32e-09	-2.02806	3.01e-09
334.14	-4.88507	2.39e-08	-3.0659	2.33e-08	-2.34821	1.84e-08	-2.60077	1.2e-08	-2.19636	8.45e-09	-1.6078	4.62e-09	-2.01969	2.62e-09
335.14	-4.87656	2.08e-08	-3.05613	2.02e-08	-2.34504	1.59e-08	-2.5837	1.04e-08	-2.1862	7.33e-09	-1.5975	4.01e-09	-2.00051	2.27e-09
336.14	-4.87367	1.8e-08	-3.04637	1.75e-08	-2.34903	1.38e-08	-2.58862	9.07e-09	-2.17996	6.37e-09	-1.59468	3.48e-09	-1.99286	1.97e-09
337.14	-4.86515	1.56e-08	-3.0366	1.52e-08	-2.35758	1.2e-08	-2.57186	7.87e-09	-2.19792	5.53e-09	-1.59452	3.02e-09	-1.99352	1.71e-09
338.14	-4.86509	1.36e-08	-3.0366	1.32e-08	-2.35913	1.04e-08	-2.56204	6.83e-09	-2.18972	4.8e-09	-1.59449	2.62e-09	-2.00172	1.49e-09
339.14	-4.87021	1.18e-08	-3.01894	1.15e-08	-2.35185	9.05e-09	-2.58298	5.93e-09	-2.20956	4.17e-09	-1.59056	2.28e-09	-2.01396	1.29e-09
340.14	-4.87461	1.02e-08	-3.00691	9.97e-09	-2.36555	7.86e-09	-2.6007	5.15e-09	-2.21745	3.62e-09	-1.59515	1.98e-09	-2.02961	1.12e-09
341.14	-4.85914	8.89e-09	-2.99754	8.65e-09	-2.36118	6.82e-09	-2.61265	4.47e-09	-2.22098	3.14e-09	-1.59641	1.72e-09	-2.04439	9.72e-10
342.14	-4.86132	7.71e-09	-2.99246	7.51e-09	-2.35579	5.92e-09	-2.63663	3.88e-09	-2.2159	2.73e-09	-1.61156	1.49e-09	-2.05892	8.44e-10
343.14	-4.86703	6.7e-09	-2.99597	6.52e-09	-2.3582	5.14e-09	-2.67241	3.37e-09	-2.20964	2.37e-09	-1.61499	1.29e-09	-2.06095	7.33e-10
344.14	-4.8875	5.81e-09	-3.00223	5.66e-09	-2.36481	4.46e-09	-2.68495	2.93e-09	-2.2159	2.05e-09	-1.63445	1.12e-09	-2.07106	6.36e-10
345.14	-4.88976	5.05e-09	-3.02371	4.91e-09	-2.3779	3.87e-09	-2.69335	2.54e-09	-2.21785	1.78e-09	-1.65508	9.75e-10	-2.0908	5.52e-10
346.14	-4.8914	4.38e-09	-3.03504	4.27e-09	-2.3761	3.36e-09	-2.69874	2.21e-09	-2.23386	1.55e-09	-1.67561	8.46e-10	-2.09837	4.79e-10
347.14	-4.86704	3.8e-09	-3.02488	3.7e-09	-2.37425	2.92e-09	-2.71028	1.91e-09	-2.21745	1.34e-09	-1.68706	7.35e-10	-2.09027	4.16e-10
348.14	-4.84412	3.3e-09	-3.00723	3.22e-09	-2.35982	2.53e-09	-2.70212	1.66e-09	-2.20956	1.17e-09	-1.67792	6.38e-10	-2.09225	3.61e-10
349.14	-4.83265	2.87e-09	-2.98544	2.79e-09	-2.36583	2.2e-09	-2.6944	1.44e-09	-2.18777	1.01e-09	-1.66968	5.54e-10	-2.09161	3.14e-10
350.14	-4.81163	2.49e-09	-2.96629	2.42e-09	-2.35641	1.91e-09	-2.67303	1.25e-09	-2.18503	8.79e-10	-1.66014	4.81e-10	-2.0904	2.72e-10
351.14	-4.79296	2.16e-09	-2.9448	2.1e-09	-2.34938	1.66e-09	-2.67147	1.09e-09	-2.17487	7.63e-10	-1.66132	4.17e-10	-2.07515	2.36e-10
352.14	-4.7889	1.88e-09	-2.9566	1.83e-09	-2.35059	1.44e-09	-2.65925	9.44e-10	-2.17683	6.63e-10	-1.65522	3.62e-10	-2.07325	2.05e-10
353.14	-4.81118	1.63e-09	-2.95692	1.59e-09	-2.35919	1.25e-09	-2.65332	8.19e-10	-2.17332	5.75e-10	-1.66617	3.15e-10	-2.07364	1.78e-10
354.14	-4.82819	1.41e-09	-2.97294	1.38e-09	-2.3579	1.09e-09	-2.64905	7.11e-10	-2.19293	4.99e-10	-1.69031	2.73e-10	-2.08837	1.55e-10
355.14	-4.82586	1.23e-09	-2.978	1.2e-09	-2.33852	9.42e-10	-2.65109	6.18e-10	-2.20456	4.34e-10	-1.69007	2.37e-10	-2.11009	1.34e-10
356.14	-4.82673	1.07e-09	-2.96786	1.04e-09	-2.31856	8.18e-10	-2.6338	5.36e-10	-2.2077	3.76e-10	-1.69121	2.06e-10	-2.10177	1.17e-10
357.14	-4.81483	9.25e-10	-2.95683	9.01e-10	-2.30716	7.1e-10	-2.63368	4.65e-10	-2.20956	3.27e-10	-1.67166	1.79e-10	-2.10006	1.01e-10
358.14	-4.80813	8.03e-10	-2.92841	7.82e-10	-2.29606	6.16e-10	-2.62324	4.04e-10	-2.20574	2.84e-10	-1.65273	1.55e-10	-2.09998	8.78e-11
359.14	-4.78539	6.97e-10	-2.91903	6.79e-10	-2.26232	5.35e-10	-2.62964	3.51e-10	-2.21746	2.46e-10	-1.63562	1.35e-10	-2.09435	7.63e-11
360.14	-4.76055	6.05e-10	-2.89793	5.89e-10	-2.26692	4.65e-10	-2.63292	3.05e-10	-2.22565	2.14e-10	-1.6303	1.17e-10	-2.07395	6.62e-11
361.14	-4.75133	5.25e-10	-2.87997	5.12e-10	-2.26157	4.03e-10	-2.63726	2.64e-10	-2.22879	1.86e-10	-1.61905	1.01e-10	-2.06587	5.75e-11
362.14	-4.74242	4.56e-10	-2.87332	4.44e-10	-2.24255	3.5e-10	-2.64746	2.3e-10	-2.23386	1.61e-10	-1.62616	8.81e-11	-2.06481	4.99e-11
363.14	-4.73273	3.96e-10	-2.8784	3.86e-10	-2.24794	3.04e-10	-2.64745	1.99e-10	-2.25699	1.4e-10	-1.64452	7.65e-11	-2.06364	4.33e-11
364.14	-4.74055	3.44e-10	-2.86707	3.35e-10	-2.23903	2.64e-10	-2.67362	1.73e-10	-2.25691	1.21e-10	-1.64765	6.64e-11	-2.05349	3.76e-11
365.14	-4.73345	2.98e-10	-2.86707	2.91e-10	-2.23727	2.29e-10	-2.66986	1.5e-10	-2.26707	1.05e-10	-1.657	5.77e-11	-2.05954	3.26e-11
366.14	-4.73091	2.59e-10	-2.86543	2.52e-10	-2.22486	1.99e-10	-2.68465	1.3e-10	-2.24707	9.15e-11	-1.66229	5.01e-11	-2.06042	2.83e-11
367.14	-4.73148	2.25e-10	-2.85339	2.19e-10	-2.22617	1.73e-10	-2.6978	1.13e-10	-2.23542	7.95e-11	-1.66225	4.35e-11	-2.06993	2.46e-11
368.14	-4.73124	1.95e-10	-2.86356	1.9e-10	-2.2336	1.5e-10	-2.7003	9.83e-11	-2.22566	6.9e-11	-1.65725	3.77e-11	-2.06907	2.14e-11
369.14	-4.74749	1.7e-10	-2.85339	1.65e-10	-2.21934	1.3e-10	-2.70652	8.53e-11	-2.22565	5.99e-11	-1.65639	3.27e-11	-2.07246	1.85e-11
370.14	-4.76015	1.47e-10	-2.87176	1.43e-10	-2.23684	1.13e-10	-2.71886	7.41e-11	-2.21746	5.2e-11	-1.66311	2.84e-11	-2.07005	1.61e-11
371.14	-4.77179	1.28e-10	-2.86472	1.24e-10	-2.23805	9.81e-11	-2.72186	6.43e-11	-2.22565	4.51e-11	-1.67264	2.47e-11	-2.07164	1.4e-11
372.14	-4.76859	1.11e-10	-2.87488	1.08e-10	-2.23086	8.51e-11	-2.71843	5.58e-11	-2.23894	3.92e-11	-1.68686	2.14e-11	-2.06446	1.21e-11
373.14	-4.77804	9.63e-11	-2.88465	9.38e-11	-2.24919	7.39e-11	-2.71769	4.85e-11	-2.25691	3.4e-11	-1.70469	1.86e-11	-2.07927	1.05e-11
374.14	-4.78586	8.36e-11	-2.90426	8.14e-11	-2.25817	6.42e-11	-2.71308	4.21e-11	-2.28621	2.95e-11	-1.72897	1.61e-11	-2.09997	9.14e-12
375.14	-4.78156	7.26e-11	-2.9159	7.07e-11	-2.28571	5.57e-11	-2.72695	3.65e-11	-2.29597	2.56e-11	-1.75156	1.4e-11	-2.11736	7.94e-12
376.14	-4.79641	6.3e-11	-2.9159	6.13e-11	-2.28731	4.84e-11	-2.74957	3.17e-11	-2.30769	2.23e-11	-1.77788	1.22e-11	-2.14872	6.89e-12
377.14	-4.81273	5.47e-11	-2.93231	5.33e-11	-2.30685	4.2e-11	-2.76941	2.75e-11	-2.32372	1.93e-11	-1.79547	1.06e-11	-2.1881	5.98e-12
378.14	-4.83912	4.75e-11	-2.94832	4.62e-11	-2.33255	3.64e-11	-2.81267	2.39e-11	-2.35964	1.68e-11	-1.82917	9.17e-12	-2.2267	5.19e-12
379.14	-4.84611	4.12e-11	-2.97145	4.01e-11	-2.35469	3.16e-11	-2.8433	2.07e-11	-2.37457	1.46e-11	-1.8448	7.96e-12	-2.25703	4.51e-12
380.14	-4.76866	3.58e-11	-2.98934	3.48e-11	-2.37264	2.75e-11	-2.78344	1.8e-11	-2.3909	1.26e-11	-1.80291	6.91e-12	-2.29452	3.91e-12
			-2.90762	3.03e-11					-2.35332	1.1e-11

## Sheet: Figure 2d
Time	400 nM	Fit	200 nM	Fit	100 nM	Fit	50 nM	Fit	25 nM	Fit	12.5 nM	Fit	6.25 nM	Fit	3.125 nM	Fit	1.56 nM	Fit
-60.16	0.163254	0	0.22937	0	0.35286	0	0.410736	0	0.386651	0	0.572365	0	0.418084	0	0.384271	0	0.426721	0
-59.16	0.277552	0	0.443588	0	0.26832	0	0.110266	0	0.338316	0	0.359507	0	0.21826	0	0.337813	0	0.343931	0
-58.16	0.219097	0	0.346939	0	0.2962	0	0.177525	0	0.268528	0	0.370815	0	0.206684	0	0.263111	0	0.359852	0
-57.16	0.180707	0	0.358902	0	0.292905	0	0.225604	0	0.289611	0	0.325948	0	0.204559	0	0.28247	0	0.394928	0
-56.16	0.230889	0	0.356018	0	0.285881	0	0.249428	0	0.308915	0	0.331085	0	0.171525	0	0.306611	0	0.34195	0
-55.16	0.188985	0	0.381866	0	0.24561	0	0.238429	0	0.270538	0	0.292302	0	0.0924525	0	0.251678	0	0.266479	0
-54.16	0.163688	0	0.342026	0	0.226966	0	0.203271	0	0.255857	0	0.265945	0	0.0775278	0	0.230589	0	0.253446	0
-53.16	0.155573	0	0.336166	0	0.210658	0	0.180593	0	0.331374	0	0.272837	0	0.240157	0	0.357208	0	0.383254	0
-52.16	0.200966	0	0.297104	0	0.27401	0	0.232551	0	0.398447	0	0.418816	0	0.301996	0	0.320917	0	0.34501	0
-51.16	0.169564	0	0.34288	0	0.214883	0	0.286353	0	0.20174	0	0.346055	0	0.111607	0	0.134129	0	0.173069	0
-50.16	0.103391	0	0.194992	0	0.175184	0	0.127078	0	0.16005	0	0.20339	0	0.0601509	0	0.129945	0	0.165757	0
-49.16	0.0937656	0	0.183823	0	0.161805	0	0.0902247	0	0.151208	0	0.195443	0	0.0989773	0	0.158593	0	0.210824	0
-48.16	0.0940742	0	0.203751	0	0.139378	0	0.109676	0	0.188244	0	0.195591	0	0.122723	0	0.167889	0	0.22488	0
-47.16	0.112428	0	0.206863	0	0.140077	0	0.104583	0	0.172763	0	0.200745	0	0.100604	0	0.164141	0	0.227694	0
-46.16	0.0896858	0	0.213577	0	0.120158	0	0.111227	0	0.178634	0	0.197153	0	0.0900565	0	0.161407	0	0.236678	0
-45.16	0.0913399	0	0.208817	0	0.110474	0	0.112716	0	0.151332	0	0.211099	0	0.0811259	0	0.145823	0	0.212885	0
-44.16	0.0949562	0	0.188904	0	0.0992439	0	0.11412	0	0.13962	0	0.196397	0	0.0690178	0	0.125918	0	0.191027	0
-43.16	0.0865517	0	0.187653	0	0.089283	0	0.115856	0	0.117878	0	0.18832	0	0.0492439	0	0.114338	0	0.168034	0
-42.16	0.0940497	0	0.149765	0	0.088587	0	0.1061	0	0.108588	0	0.176989	0	0.0481479	0	0.101447	0	0.140464	0
-41.16	0.0872869	0	0.139755	0	0.0818243	0	0.0952845	0	0.103833	0	0.171233	0	0.048398	0	0.0948153	0	0.121182	0
-40.16	0.0747839	0	0.122025	0	0.089234	0	0.0898279	0	0.0914173	0	0.169938	0	0.0486317	0	0.0922413	0	0.116335	0
-39.16	0.082285	0	0.108826	0	0.0982915	0	0.0791377	0	0.0997299	0	0.161936	0	0.0553116	0	0.118758	0	0.116759	0
-38.16	0.0857245	0	0.110397	0	0.0966498	0	0.0870203	0	0.102388	0	0.167481	0	0.049837	0	0.111421	0	0.117937	0
-37.16	0.0743902	0	0.100937	0	0.0950811	0	0.0706904	0	0.108081	0	0.163097	0	0.0721772	0	0.112354	0	0.122302	0
-36.16	0.0998478	0	0.107254	0	0.120554	0	0.0893612	0	0.116713	0	0.164927	0	0.0918255	0	0.125975	0	0.150145	0
-35.16	0.116013	0	0.123581	0	0.128586	0	0.0942224	0	0.138078	0	0.186707	0	0.106615	0	0.143587	0	0.166506	0
-34.16	0.117377	0	0.138199	0	0.110648	0	0.102776	0	0.145795	0	0.188735	0	0.0986304	0	0.134046	0	0.156568	0
-33.16	0.106419	0	0.118988	0	0.0896187	0	0.0929527	0	0.136204	0	0.168957	0	0.095295	0	0.122898	0	0.14542	0
-32.16	0.107362	0	0.104126	0	0.0690773	0	0.0935814	0	0.119501	0	0.145211	0	0.0785925	0	0.120554	0	0.136912	0
-31.16	0.120792	0	0.107269	0	0.074375	0	0.094906	0	0.117267	0	0.135555	0	0.0731541	0	0.118015	0	0.144443	0
-30.16	0.123682	0	0.104126	0	0.06782	0	0.0881096	0	0.118087	0	0.131525	0	0.075225	0	0.109069	0	0.135116	0
-29.16	0.118037	0	0.0927277	0	0.0589698	0	0.0802361	0	0.119323	0	0.122721	0	0.0683432	0	0.102187	0	0.11682	0
-28.16	0.140256	0	0.0874176	0	0.072675	0	0.0685603	0	0.116219	0	0.128614	0	0.0854721	0	0.0981369	0	0.115669	0
-27.16	0.156879	0	0.0963287	0	0.102665	0	0.0783505	0	0.126323	0	0.139621	0	0.111583	0	0.117701	0	0.133982	0
-26.16	0.146027	0	0.125229	0	0.110093	0	0.0919335	0	0.109659	0	0.163247	0	0.116007	0	0.102274	0	0.110667	0
-25.16	0.133127	0	0.105621	0	0.09672	0	0.0948541	0	0.0890567	0	0.149264	0	0.106742	0	0.0819156	0	0.108039	0
-24.16	0.141511	0	0.108521	0	0.104798	0	0.0802149	0	0.096727	0	0.153122	0	0.104646	0	0.0697495	0	0.114076	0
-23.16	0.118302	0	0.0989838	0	0.0831305	0	0.0910791	0	0.083521	0	0.144707	0	0.0832311	0	0.063181	0	0.106882	0
-22.16	0.0982094	0	0.064682	0	0.0614967	0	0.0581932	0	0.07761	0	0.125988	0	0.0644417	0	0.0572701	0	0.0946388	0
-21.16	0.0937599	0	0.0306091	0	0.0589851	0	0.0513055	0	0.0783148	0	0.121142	0	0.0487432	0	0.0696936	0	0.0957403	0
-20.16	0.0746959	0	0.0189819	0	0.0563395	0	0.0488851	0	0.0631303	0	0.114392	0	0.0253342	0	0.0591782	0	0.0836686	0
-19.16	0.044694	0	0.0271759	0	0.0638438	0	0.023345	0	0.0298797	0	0.0822306	0	-0.00282	0	0.0111877	0	0.010974	0
-18.16	0.0446997	0	0.0287476	0	0.058753	0	0.0217829	0	-0.000941	0	0.0304785	0	-0.0371504	0	-0.0408125	0	-0.0788221	0
-17.16	0.0843718	0	0.00288	0	0.0445311	0	-0.0194456	0	-0.0250067	0	-0.0337923	0	-0.029981	0	-0.0501226	0	-0.0924352	0
-16.16	0.0814693	0	-0.0201569	0	0.0485866	0	-0.0282009	0	0.00893	0	-0.0303166	0	0.0137255	0	0.0210802	0	-0.0329511	0
-15.16	0.0883852	0	0.0155334	0	0.0685488	0	-0.0108095	0	0.0385244	0	0.0160814	0	0.0480917	0	0.0506857	0	0.0228231	0
-14.16	0.0797981	0	0.0499268	0	0.0614265	0	0.0145012	0	0.0215751	0	0.0367836	0	0.0494071	0	0.0359946	0	0.037429	0
-13.16	0.0486854	0	0.0388947	0	0.0514168	0	-0.00479	0	0.020034	0	0.0354408	0	0.0412437	0	0.0328208	0	0.0276939	0
-12.16	0.0549262	0	0.0373383	0	0.0396979	0	-0.00439	0	0.0288227	0	0.028208	0	0.0370624	0	0.0330951	0	0.0360858	0
-11.16	0.0421181	0	0.0307007	0	0.0253182	0	-0.000172	0	0.0224116	0	0.0228158	0	0.0303309	0	0.0149653	0	0.0281184	0
-10.16	0.0114968	0	-0.000641	0	0.0129769	0	-0.00706	0	0.0131587	0	0.00449	0	0.00936	0	0.00414	0	0.0106562	0
-9.15997	-0.00171	0	-0.0298462	0	-0.000936	0	-0.0161079	0	0.00238	0	-0.00518	0	0.00687	0	0.0032	0	0.00972	0
-8.15997	-0.0196799	0	-0.0314178	0	-0.0172691	0	-0.00954	0	-0.018604	0	-0.0260123	0	-0.0169256	0	-0.00574	0	-0.00939	0
-7.15997	-0.0506736	0	-0.0298615	0	-0.0377951	0	-0.00902	0	-0.0214741	0	-0.0562659	0	-0.0475361	0	-0.0269825	0	-0.0318653	0
-6.15997	-0.0548456	0	-0.0314941	0	-0.0419672	0	-0.0259345	0	-0.0219662	0	-0.0828531	0	-0.0433438	0	-0.0387967	0	-0.0260251	0
-5.15997	-0.0728052	0	-0.0298462	0	-0.0356958	0	-0.0340827	0	-0.0219586	0	-0.0749109	0	-0.0516064	0	-0.0404217	0	-0.0424206	0
-4.15997	-0.0710195	0	-0.00368	0	-0.038915	0	-0.0425059	0	0.0141754	0	-0.0912527	0	-0.0482178	0	-0.0569611	0	-0.0637207	0
-3.15997	-0.0425998	0	-0.0118866	0	0.101291	0	-0.00843	0	0.071732	0	-0.0299121	0	0.00816	0	0.0107579	0	-0.00577	0
-2.15997	-0.0659035	0	-0.0072	0	-0.0162209	0	-0.0138694	0	-0.0258814	0	-0.0917214	0	-0.0934321	0	-0.0791193	0	-0.0890223	0
-1.15997	0.0340716	0	-0.105392	0	0.0372607	0	-0.0140673	0	0.081234	0	-0.0866407	0	0.066967	0	0.102764	0	0.228573	0
-0.159973	-4.548	0	-0.389526	0	-4.10621	0	-2.9273	0	-1.41036	0	-3.05949	0	-1.23737	0	-1.39017	0	-1.69553	0
0.840027	4.3738	5.16315	-0.940475	-3.974	1.78113	-0.431004	1.86816	0.325062	-0.0687208	1.61192	1.87443	0.0758926	0.0699816	0.442248	0.0155382	-0.667804	0.190816	-1.58884
1.84003	4.77192	11.197	0.150299	-0.50824	1.41176	1.26254	-0.280987	1.20409	0.381505	2.04684	-0.576053	0.297005	0.054662	0.551834	-0.215403	-0.612939	-0.409663	-1.56143
2.84003	10.2631	16.4942	2.98961	2.7122	3.55376	2.88259	0.994746	2.0572	1.08259	2.47202	-0.0994291	0.513947	0.253791	0.659549	-0.07174	-0.558962	-0.359292	-1.53446
3.84003	15.2679	21.1497	6.40085	5.70555	5.58158	4.43249	2.20428	2.88519	1.82009	2.88768	0.176419	0.7268	0.461995	0.765428	-0.00573	-0.505857	-0.362102	-1.50791
4.84003	19.6622	25.2467	9.59038	8.48869	7.45251	5.91544	3.40021	3.68883	2.46899	3.29405	0.53361	0.935646	0.62886	0.869502	0.0237269	-0.45361	-0.373353	-1.48177
5.84003	23.5428	28.8572	12.4583	11.0772	9.21233	7.3345	4.52797	4.46888	3.10616	3.69135	0.789101	1.14056	0.844247	0.971804	0.0565269	-0.402206	-0.397819	-1.45605
6.84003	27.0152	32.0443	15.0678	13.4857	10.8449	8.69259	5.57894	5.22607	3.73598	4.0798	1.08408	1.34163	1.045	1.07237	0.127672	-0.351631	-0.406447	-1.43073
7.84003	30.062	34.8626	17.4244	15.7274	12.4098	9.99249	6.57272	5.96112	4.30604	4.45959	1.38209	1.53893	1.18506	1.17122	0.21539	-0.301871	-0.410434	-1.4058
8.84003	32.8172	37.3597	19.594	17.8148	13.843	11.2369	7.55597	6.6747	4.8441	4.83094	1.6665	1.73252	1.33875	1.2684	0.285953	-0.252911	-0.413083	-1.38127
9.84003	35.2867	39.5771	21.5599	19.7594	15.1328	12.4282	8.47586	7.36748	5.41209	5.19404	1.95565	1.9225	1.46416	1.36392	0.334717	-0.204739	-0.409073	-1.35712
10.84	37.4943	41.5508	23.3819	21.5717	16.381	13.569	9.33231	8.0401	5.9134	5.54909	2.20424	2.10891	1.60296	1.45783	0.373835	-0.15734	-0.386053	-1.33334
11.84	39.4957	43.3122	25.0323	23.2617	17.5459	14.6615	10.1476	8.69319	6.39726	5.89628	2.46946	2.29185	1.74698	1.55015	0.440675	-0.110701	-0.364913	-1.30994
12.84	41.3588	44.8884	26.5193	24.8385	18.6299	15.708	10.887	9.32736	6.84242	6.23579	2.73369	2.47137	1.86371	1.64091	0.506849	-0.0648105	-0.360857	-1.2869
13.84	43.0415	46.3033	27.9291	26.3103	19.6376	16.7105	11.6504	9.94319	7.25148	6.56781	2.97176	2.64754	1.96087	1.73014	0.553404	-0.0196547	-0.391252	-1.26422
14.84	44.5926	47.5774	29.2412	27.6851	20.597	17.6711	12.3509	10.5412	7.63609	6.8925	3.18202	2.82044	2.0737	1.81786	0.605988	0.0247788	-0.38742	-1.2419
15.84	45.9869	48.7287	30.4702	28.9701	21.4849	18.5916	12.9654	11.1221	7.98996	7.21005	3.40802	2.99012	2.18578	1.90411	0.623445	0.0685022	-0.405974	-1.21992
16.84	47.3439	49.7726	31.5685	30.1718	22.3338	19.4739	13.582	11.6862	8.45039	7.52062	3.60002	3.15665	2.31143	1.9889	0.663727	0.111528	-0.391876	-1.19828
17.84	48.5781	50.7228	32.5678	31.2966	23.1172	20.3197	14.1466	12.2342	8.84422	7.82437	3.83425	3.32009	2.42596	2.07227	0.71637	0.153867	-0.370392	-1.17698
18.84	49.692	51.5911	33.5385	32.35	23.8514	21.1307	14.7308	12.7665	9.16783	8.12147	4.04694	3.4805	2.50582	2.15423	0.760067	0.195532	-0.3671	-1.15601
19.84	50.7705	52.3875	34.4522	33.3374	24.5396	21.9086	15.301	13.2836	9.50482	8.41207	4.22841	3.63794	2.60454	2.23483	0.798535	0.236533	-0.369952	-1.13536
20.84	51.7681	53.1212	35.2822	34.2636	25.1893	22.6547	15.7913	13.786	9.83188	8.69633	4.39729	3.79248	2.68628	2.31407	0.837708	0.276884	-0.361953	-1.11503
21.84	52.6604	53.7997	36.0616	35.1332	25.7779	23.3705	16.2604	14.2742	10.1226	8.97439	4.56376	3.94416	2.75629	2.39198	0.876847	0.316593	-0.368194	-1.09502
22.84	53.5377	54.4298	36.8197	35.9504	26.3659	24.0575	16.7034	14.7485	10.4025	9.24641	4.72998	4.09305	2.82397	2.4686	0.9086	0.355673	-0.360977	-1.07532
23.84	54.3838	55.0174	37.478	36.7189	26.9537	24.7169	17.1631	15.2095	10.6909	9.51251	4.92121	4.2392	2.89182	2.54393	0.956611	0.394133	-0.343987	-1.05591
24.84	55.1568	55.5676	38.1385	37.4425	27.4667	25.3501	17.6105	15.6574	10.9464	9.77285	5.11968	4.38267	2.95629	2.61801	0.997096	0.431985	-0.331868	-1.03681
25.84	55.8959	56.0847	38.7397	38.1243	27.9427	25.9581	18.014	16.0928	11.2125	10.0276	5.27064	4.5235	3.03096	2.69086	1.02387	0.469239	-0.3325	-1.018
26.84	56.5951	56.5727	39.3983	38.7674	28.4412	26.5421	18.3819	16.516	11.4851	10.2768	5.40985	4.66175	3.11058	2.76249	1.0452	0.505905	-0.322892	-0.999484
27.84	57.2631	57.0349	39.9392	39.3748	28.9014	27.1032	18.753	16.9274	11.7514	10.5206	5.55673	4.79748	3.19104	2.83294	1.07129	0.541993	-0.314698	-0.981248
28.84	57.8741	57.4741	40.4897	39.9489	29.3445	27.6426	19.1072	17.3274	11.9822	10.7592	5.69744	4.93073	3.25878	2.90221	1.10287	0.577513	-0.310539	-0.963292
29.84	58.4897	57.893	40.9779	40.4922	29.756	28.161	19.4437	17.7162	12.2276	10.9926	5.8514	5.06154	3.33522	2.97034	1.13859	0.612474	-0.295994	-0.94561
30.84	59.0341	58.2937	41.4894	41.007	30.1498	28.6596	19.7918	18.0943	12.4507	11.2211	6.01744	5.18998	3.39844	3.03734	1.17244	0.646886	-0.275652	-0.928199
31.84	59.6116	58.6783	41.9767	41.4953	30.5457	29.1392	20.1232	18.462	12.6869	11.4447	6.16613	5.31608	3.4729	3.10324	1.22051	0.680758	-0.264782	-0.911054
32.84	60.1953	59.0483	42.4288	41.9589	30.9321	29.6006	20.4657	18.8196	12.8959	11.6635	6.32616	5.43989	3.57027	3.16805	1.25794	0.7141	-0.239058	-0.89417
33.84	60.6394	59.4052	42.8658	42.3998	31.3449	30.0447	20.8029	19.1674	13.0987	11.8777	6.4455	5.56146	3.65424	3.23179	1.29082	0.74692	-0.225325	-0.877543
34.84	61.1278	59.7503	43.2984	42.8195	31.7224	30.4723	21.0836	19.5058	13.3059	12.0873	6.55741	5.68083	3.74347	3.29449	1.33786	0.779228	-0.198122	-0.861169
35.84	61.6003	60.0847	43.7087	43.2196	32.0589	30.8841	21.3619	19.8349	13.4998	12.2924	6.69301	5.79804	3.81827	3.35615	1.37165	0.811031	-0.19497	-0.845043
36.84	62.0123	60.4094	44.081	43.6014	32.3585	31.2808	21.6323	20.1552	13.6786	12.4933	6.82413	5.91314	3.8874	3.4168	1.39031	0.842339	-0.203103	-0.829163
37.84	62.4603	60.7252	44.4487	43.9662	32.6384	31.6631	21.9215	20.4668	13.8419	12.6899	6.93397	6.02618	3.94661	3.47646	1.40982	0.87316	-0.202807	-0.813523
38.84	62.8538	61.0329	44.7803	44.3152	32.9206	32.0317	22.1928	20.77	14.0192	12.8823	7.049	6.13718	3.98307	3.53515	1.42199	0.903502	-0.21172	-0.798119
39.84	63.2153	61.3332	45.1009	44.6496	33.192	32.3871	22.4053	21.0652	14.188	13.0708	7.13465	6.24619	4.02632	3.59288	1.42969	0.933373	-0.212617	-0.782948
40.84	63.6145	61.6265	45.46	44.9704	33.4606	32.73	22.6326	21.3525	14.351	13.2553	7.21406	6.35325	4.07967	3.64966	1.45335	0.962782	-0.219819	-0.768006
41.84	63.9722	61.9135	45.7819	45.2785	33.7364	33.061	22.8556	21.6321	14.4963	13.4359	7.30636	6.4584	4.14524	3.70553	1.48768	0.991736	-0.213313	-0.753289
42.84	64.3065	62.1945	46.0779	45.5747	33.9991	33.3805	23.0623	21.9044	14.6406	13.6128	7.40154	6.56167	4.19609	3.76048	1.50109	1.02024	-0.214649	-0.738794
43.84	64.6119	62.4699	46.3881	45.86	34.237	33.6891	23.2745	22.1696	14.787	13.786	7.48719	6.66311	4.25549	3.81455	1.52832	1.04831	-0.205705	-0.724516
44.84	64.9429	62.7402	46.6873	46.135	34.4866	33.9872	23.4845	22.4278	14.9516	13.9556	7.58468	6.76275	4.33725	3.86774	1.56055	1.07594	-0.202464	-0.710452
45.84	65.2746	63.0055	46.9698	46.4005	34.7282	34.2754	23.6743	22.6792	15.0908	14.1217	7.68671	6.86062	4.3866	3.92007	1.56232	1.10315	-0.203901	-0.696599
46.84	65.57	63.2661	47.2267	46.657	34.9552	34.554	23.8656	22.9242	15.2448	14.2844	7.77599	6.95676	4.4324	3.97156	1.60374	1.12995	-0.206924	-0.682953
47.84	65.8593	63.5223	47.4862	46.9052	35.1745	34.8236	24.0814	23.1629	15.4068	14.4437	7.85558	7.0512	4.48667	4.02222	1.63645	1.15633	-0.198757	-0.669511
48.84	66.1313	63.7743	47.7854	47.1457	35.3874	35.0844	24.3027	23.3954	15.5579	14.5998	7.93707	7.14398	4.51734	4.07206	1.66064	1.18231	-0.185965	-0.656269
49.84	66.3781	64.0223	48.06	47.3789	35.5727	35.337	24.4821	23.622	15.6709	14.7527	8.02304	7.23513	4.53202	4.1211	1.67204	1.20789	-0.202304	-0.643224
50.84	66.641	64.2664	48.2705	47.6053	35.788	35.5816	24.6474	23.8428	15.7911	14.9025	8.08964	7.32469	4.58524	4.16936	1.68908	1.23308	-0.195034	-0.630374
51.84	66.898	64.5068	48.5096	47.8254	35.9941	35.8186	24.8142	24.0581	15.8753	15.0493	8.18384	7.41267	4.61379	4.21685	1.67693	1.25789	-0.210381	-0.617713
52.84	67.1731	64.7437	48.7021	48.0395	36.1826	36.0484	24.964	24.268	15.976	15.1931	8.22903	7.49912	4.63936	4.26358	1.67165	1.28232	-0.206142	-0.60524
53.84	67.4401	64.9771	48.9471	48.248	36.378	36.2712	25.1277	24.4726	16.0894	15.3339	8.28957	7.58406	4.6872	4.30957	1.68003	1.30638	-0.205637	-0.592952
54.84	67.6708	65.2071	49.158	48.4513	36.5967	36.4874	25.2883	24.6722	16.2192	15.472	8.35976	7.66753	4.73527	4.35482	1.69888	1.33008	-0.196551	-0.580845
55.84	67.8735	65.4339	49.3623	48.6498	36.7767	36.6972	25.4647	24.8668	16.328	15.6073	8.43838	7.74955	4.78519	4.39936	1.72598	1.35342	-0.21515	-0.568916
56.84	68.0851	65.6576	49.5681	48.8435	36.9558	36.901	25.6311	25.0566	16.4385	15.7399	8.49777	7.83016	4.80767	4.44319	1.7584	1.3764	-0.205792	-0.557163
57.84	68.3044	65.8782	49.7885	49.033	37.1341	37.099	25.7961	25.2419	16.5262	15.8698	8.56061	7.90937	4.85606	4.48633	1.77896	1.39904	-0.196948	-0.545583
58.84	68.5431	66.0958	50.0092	49.2184	37.3139	37.2915	25.9444	25.4226	16.6105	15.9972	8.60665	7.98722	4.8848	4.52879	1.79787	1.42134	-0.195939	-0.534172
59.84	68.7097	66.3104	50.2068	49.3999	37.4626	37.4786	26.072	25.599	16.6922	16.1221	8.662	8.06373	4.90948	4.57058	1.80083	1.44331	-0.208756	-0.522928
60.84	68.8779	66.5222	50.3717	49.5778	37.6033	37.6607	26.1784	25.7712	16.7729	16.2445	8.68913	8.13894	4.93794	4.61172	1.80499	1.46494	-0.221319	-0.511849
61.84	69.0727	66.7312	50.5416	49.7523	37.7606	37.8379	26.2972	25.9392	16.8817	16.3645	8.75158	8.21285	4.96659	4.65221	1.80934	1.48626	-0.234921	-0.50093
62.84	69.2587	66.9375	50.7021	49.9235	37.9217	38.0104	26.4187	26.1033	16.9813	16.4822	8.7998	8.28551	4.9978	4.69207	1.81571	1.50725	-0.241835	-0.490171
63.84	69.4708	67.1411	50.872	50.0917	38.085	38.1786	26.5319	26.2636	17.0887	16.5975	8.85753	8.35694	5.03486	4.73131	1.83034	1.52793	-0.235407	-0.479568
64.84	69.642	67.342	51.0612	50.257	38.2284	38.3424	26.6675	26.4201	17.1995	16.7107	8.93209	8.42715	5.07659	4.76994	1.84091	1.54831	-0.244376	-0.469119
65.84	69.8106	67.5404	51.2544	50.4195	38.3841	38.5022	26.7995	26.5731	17.2981	16.8216	8.9879	8.49618	5.1216	4.80796	1.84996	1.56838	-0.244994	-0.458821
66.84	69.9819	67.7362	51.4584	50.5794	38.5745	38.6581	26.9374	26.7225	17.4075	16.9305	9.04281	8.56405	5.17373	4.8454	1.8693	1.58816	-0.235206	-0.448672
67.84	70.1609	67.9294	51.6303	50.7368	38.7341	38.8103	27.0675	26.8685	17.5165	17.0372	9.1114	8.63077	5.21425	4.88226	1.85934	1.60764	-0.243822	-0.438668
68.84	70.3156	68.1203	51.7592	50.8919	38.8433	38.9588	27.1919	27.0112	17.5818	17.1419	9.16561	8.69638	5.22725	4.91855	1.85257	1.62684	-0.251924	-0.428809
69.84	70.491	68.3087	51.8819	51.0447	38.9681	39.104	27.2993	27.1507	17.6474	17.2446	9.20233	8.76089	5.25347	4.95428	1.86583	1.64575	-0.237029	-0.419091
70.84	70.6526	68.4947	52.0275	51.1953	39.0983	39.2458	27.424	27.2872	17.7115	17.3454	9.24969	8.82433	5.26737	4.98947	1.85826	1.66439	-0.235159	-0.409513
71.84	70.8057	68.6783	52.1709	51.3439	39.248	39.3845	27.5107	27.4206	17.7874	17.4443	9.31289	8.88671	5.29544	5.02412	1.87499	1.68276	-0.226377	-0.400071
72.84	70.9529	68.8596	52.3213	51.4906	39.3905	39.5202	27.6082	27.5511	17.8603	17.5413	9.35221	8.94806	5.3178	5.05823	1.88095	1.70085	-0.215658	-0.390764
73.84	71.074	69.0387	52.4701	51.6353	39.5103	39.653	27.7076	27.6787	17.9307	17.6365	9.39102	9.0084	5.33589	5.09183	1.88927	1.71869	-0.21547	-0.38159
74.84	71.1873	69.2155	52.6217	51.7782	39.6116	39.7831	27.7972	27.8036	17.9904	17.73	9.4288	9.06775	5.35452	5.12492	1.89149	1.73626	-0.243867	-0.372545
75.84	71.3074	69.39	52.7412	51.9194	39.714	39.9105	27.8747	27.9259	18.0342	17.8217	9.43945	9.12612	5.37889	5.15751	1.88461	1.75358	-0.260835	-0.363629
76.84	71.4421	69.5624	52.8635	52.059	39.8257	40.0353	27.9423	28.0456	18.1179	17.9117	9.4549	9.18354	5.41379	5.1896	1.89052	1.77065	-0.286479	-0.354839
77.84	71.5821	69.7326	53.0091	52.1969	39.9557	40.1576	28.0269	28.1627	18.2007	18.0001	9.49384	9.24002	5.43628	5.22121	1.90146	1.78747	-0.288207	-0.346173
78.84	71.7042	69.9007	53.1514	52.3333	40.08	40.2777	28.099	28.2774	18.2874	18.0869	9.5335	9.29558	5.4556	5.25234	1.89797	1.80405	-0.30325	-0.337629
79.84	71.8435	70.0667	53.2838	52.4682	40.2076	40.3954	28.1883	28.3898	18.3399	18.1721	9.58357	9.35025	5.47395	5.28301	1.8981	1.82039	-0.314212	-0.329205
80.84	71.983	70.2306	53.3951	52.6016	40.3306	40.511	28.2666	28.4999	18.362	18.2558	9.61141	9.40403	5.48598	5.31322	1.89748	1.8365	-0.341249	-0.320899
81.84	72.0776	70.3924	53.5107	52.7336	40.4136	40.6246	28.3334	28.6078	18.4023	18.3379	9.63546	9.45695	5.47896	5.34298	1.8996	1.85237	-0.363491	-0.312709
82.84	72.1837	70.5522	53.6135	52.8643	40.5103	40.7361	28.4136	28.7135	18.4503	18.4186	9.66041	9.50902	5.47969	5.3723	1.89908	1.86803	-0.374087	-0.304633
83.84	72.2932	70.7101	53.7037	52.9937	40.5999	40.8457	28.5034	28.8171	18.5109	18.4979	9.6723	9.56026	5.48791	5.40118	1.92058	1.88345	-0.395166	-0.29667
84.84	72.4021	70.8659	53.8116	53.1218	40.701	40.9534	28.5957	28.9187	18.585	18.5757	9.70007	9.61068	5.49809	5.42964	1.921	1.89866	-0.394751	-0.288817
85.84	72.5138	71.0198	53.9209	53.2486	40.7896	41.0594	28.6948	29.0183	18.63	18.6522	9.74072	9.66031	5.50581	5.45767	1.91075	1.91366	-0.395158	-0.281072
86.84	72.6307	71.1718	54.0419	53.3743	40.9065	41.1637	28.7768	29.116	18.696	18.7274	9.77179	9.70915	5.51772	5.4853	1.92734	1.92844	-0.404508	-0.273435
87.84	72.7142	71.3219	54.1514	53.4988	40.9917	41.2664	28.8647	29.2118	18.7392	18.8012	9.798	9.75722	5.5189	5.51252	1.91024	1.94301	-0.419958	-0.265903
88.84	72.7849	71.4702	54.2494	53.6221	41.0802	41.3674	28.9366	29.3059	18.7822	18.8738	9.8295	9.80454	5.52873	5.53934	1.91875	1.95738	-0.440748	-0.258474
89.84	72.8521	71.6166	54.3213	53.7443	41.1623	41.467	28.9873	29.3982	18.8198	18.9451	9.85165	9.85112	5.53714	5.56577	1.90887	1.97155	-0.460389	-0.251147
90.84	72.9277	71.7611	54.39	53.8655	41.218	41.565	29.044	29.4888	18.8541	19.0153	9.86612	9.89697	5.53893	5.59182	1.89278	1.98552	-0.489454	-0.24392
91.84	73.0204	71.9039	54.4421	53.9855	41.2915	41.6617	29.0804	29.5778	18.89	19.0842	9.87292	9.94212	5.54843	5.61749	1.87486	1.9993	-0.501436	-0.236792
92.84	73.1139	72.0448	54.5505	54.1045	41.3815	41.757	29.1257	29.6651	18.9415	19.1519	9.90957	9.98656	5.56741	5.6428	1.8629	2.01289	-0.505204	-0.229761
93.84	73.1841	72.1841	54.6498	54.2225	41.4634	41.851	29.1928	29.7509	18.9825	19.2186	9.91895	10.0303	5.58687	5.66773	1.85281	2.02628	-0.521913	-0.222825
94.84	73.2652	72.3215	54.7298	54.3395	41.5527	41.9437	29.2549	29.8352	19.023	19.2841	9.93906	10.0734	5.60796	5.69231	1.84445	2.0395	-0.513792	-0.215982
95.84	73.3544	72.4573	54.8213	54.4555	41.6251	42.0353	29.325	29.9181	19.0739	19.3485	9.96014	10.1159	5.61143	5.71654	1.85123	2.05253	-0.513352	-0.209232
96.84	73.4463	72.5914	54.9209	54.5706	41.6939	42.1256	29.4018	29.9995	19.1061	19.4119	9.98477	10.1577	5.60901	5.74043	1.83426	2.06538	-0.540162	-0.202573
97.84	73.5392	72.7238	55.0306	54.6847	41.7823	42.2148	29.4816	30.0795	19.1393	19.4742	9.99867	10.1988	5.6067	5.76398	1.83851	2.07806	-0.554113	-0.196003
98.84	73.6595	72.8546	55.1319	54.7979	41.8717	42.3029	29.5429	30.1582	19.1734	19.5355	10.0258	10.2394	5.62614	5.78719	1.83975	2.09056	-0.554204	-0.18952
99.84	73.7725	72.9837	55.2138	54.9101	41.9619	42.39	29.6159	30.2356	19.1934	19.5958	10.0385	10.2793	5.62953	5.81008	1.85126	2.1029	-0.544175	-0.183125
100.84	73.8676	73.1113	55.2822	55.0215	42.0286	42.476	29.6696	30.3117	19.2341	19.6552	10.0639	10.3186	5.6212	5.83264	1.84301	2.11506	-0.55907	-0.176814
101.84	73.9373	73.2372	55.3604	55.132	42.1119	42.5611	29.7054	30.3866	19.2758	19.7136	10.0749	10.3574	5.6479	5.85489	1.85354	2.12706	-0.569631	-0.170586
102.84	74.0117	73.3616	55.4518	55.2416	42.1809	42.6452	29.7461	30.4603	19.3308	19.7711	10.1076	10.3956	5.6771	5.87683	1.85938	2.13891	-0.565347	-0.164441
103.84	74.1022	73.4844	55.5502	55.3503	42.2405	42.7283	29.7959	30.5328	19.3742	19.8276	10.119	10.4332	5.69609	5.89847	1.86242	2.15059	-0.562702	-0.158377
104.84	74.1826	73.6057	55.6318	55.4582	42.3034	42.8106	29.8623	30.6042	19.4213	19.8833	10.1332	10.4702	5.70667	5.9198	1.85216	2.16211	-0.563126	-0.152393
105.84	74.2881	73.7255	55.6904	55.5652	42.3713	42.892	29.9167	30.6745	19.4597	19.9382	10.1587	10.5068	5.71299	5.94084	1.84995	2.17349	-0.555322	-0.146487
106.84	74.372	73.8438	55.7816	55.6715	42.4419	42.9726	29.9933	30.7438	19.4919	19.9922	10.1836	10.5428	5.72598	5.9616	1.84138	2.18471	-0.554369	-0.140657
107.84	74.4417	73.9606	55.8443	55.7769	42.5097	43.0523	30.0561	30.812	19.5189	20.0453	10.2002	10.5782	5.75415	5.98207	1.8416	2.19578	-0.535871	-0.134904
108.84	74.5139	74.076	55.9307	55.8815	42.5835	43.1313	30.1128	30.8792	19.5589	20.0977	10.2153	10.6132	5.77621	6.00226	1.85262	2.20671	-0.515158	-0.129225
109.84	74.6025	74.1899	55.9912	55.9853	42.633	43.2095	30.1812	30.9454	19.6099	20.1493	10.2343	10.6477	5.78772	6.02217	1.86095	2.21749	-0.525041	-0.12362
110.84	74.6666	74.3024	56.0678	56.0884	42.6857	43.2869	30.2331	31.0107	19.6405	20.2001	10.2625	10.6817	5.80667	6.04182	1.8616	2.22813	-0.533829	-0.118087
111.84	74.7363	74.4136	56.1318	56.1906	42.7359	43.3637	30.2826	31.0751	19.6709	20.2501	10.2822	10.7152	5.81003	6.0612	1.86153	2.23863	-0.551953	-0.112625
112.84	74.8153	74.5233	56.21	56.2921	42.8036	43.4397	30.3426	31.1385	19.7206	20.2994	10.305	10.7482	5.81015	6.08033	1.86227	2.249	-0.554963	-0.107233
113.84	74.876	74.6317	56.2838	56.3928	42.8577	43.5151	30.3998	31.2011	19.7543	20.348	10.3416	10.7807	5.80952	6.09919	1.84149	2.25923	-0.562149	-0.101909
114.84	74.9411	74.7387	56.3314	56.4928	42.9309	43.5897	30.4441	31.2628	19.7897	20.3959	10.3466	10.8128	5.83359	6.11781	1.84165	2.26933	-0.554182	-0.0966532
115.84	74.9781	74.8444	56.4095	56.5921	42.9895	43.6638	30.5099	31.3238	19.8322	20.4431	10.352	10.8445	5.83202	6.13618	1.84312	2.2793	-0.558945	-0.091464
116.84	75.0227	74.9487	56.4534	56.6906	43.0536	43.7372	30.5618	31.3839	19.8733	20.4896	10.378	10.8757	5.86832	6.15431	1.86778	2.28914	-0.54405	-0.0863402
117.84	75.0819	75.0518	56.5392	56.7883	43.1322	43.81	30.612	31.4432	19.902	20.5355	10.4026	10.9065	5.87906	6.1722	1.88798	2.29886	-0.525425	-0.0812808
118.84	75.1436	75.1536	56.599	56.8854	43.1937	43.8822	30.658	31.5017	19.9434	20.5807	10.4284	10.9369	5.87124	6.18986	1.89843	2.30845	-0.531383	-0.0762848
119.84	75.2306	75.2541	56.6495	56.9817	43.2431	43.9539	30.7297	31.5595	19.9885	20.6253	10.4518	10.9668	5.87883	6.20728	1.91119	2.31792	-0.521822	-0.0713512
120.84	75.3116	75.3534	56.7185	57.0774	43.3128	44.025	30.7923	31.6166	20.0517	20.6693	10.4821	10.9964	5.89167	6.22448	1.93216	2.32727	-0.509373	-0.0664789
121.84	75.3987	75.4514	56.8018	57.1723	43.3756	44.0955	30.8722	31.673	20.1011	20.7127	10.5224	11.0256	5.90002	6.24146	1.95026	2.3365	-0.494393	-0.0616671
122.84	75.501	75.5483	56.8803	57.2666	43.4615	44.1655	30.925	31.7287	20.1523	20.7555	10.5568	11.0543	5.93987	6.25822	1.97216	2.34562	-0.470938	-0.0569146
123.84	75.5642	75.6439	56.9521	57.3601	43.5358	44.2349	30.9908	31.7838	20.2101	20.7977	10.6008	11.0827	5.95666	6.27477	1.98231	2.35462	-0.470553	-0.0522207
124.84	75.6256	75.7383	57.0221	57.453	43.6041	44.3039	31.0698	31.8382	20.2514	20.8393	10.6317	11.1107	5.98666	6.2911	1.99083	2.36352	-0.473282	-0.0475842
125.84	75.6764	75.8315	57.0908	57.5452	43.6499	44.3723	31.1283	31.8919	20.2939	20.8804	10.6755	11.1384	5.98973	6.30723	1.98411	2.3723	-0.482884	-0.0430044
126.84	75.7383	75.9236	57.1595	57.6367	43.7003	44.4403	31.1709	31.9451	20.3222	20.921	10.6992	11.1657	6.00991	6.32316	1.98671	2.38097	-0.480983	-0.0384802
127.84	75.7805	76.0146	57.2148	57.7276	43.7293	44.5078	31.2208	31.9976	20.3434	20.961	10.699	11.1926	6.0396	6.33888	1.99329	2.38954	-0.50871	-0.0340109
128.84	75.8321	76.1044	57.2611	57.8178	43.8021	44.5748	31.2605	32.0496	20.3874	21.0005	10.7193	11.2192	6.06523	6.35441	2.02876	2.398	-0.503784	-0.0295954
129.84	75.8886	76.1931	57.308	57.9073	43.8687	44.6413	31.3048	32.101	20.4148	21.0395	10.7444	11.2454	6.06332	6.36975	2.03318	2.40636	-0.48304	-0.0252331
130.84	75.9377	76.2807	57.3702	57.9962	43.9179	44.7074	31.3503	32.1519	20.4811	21.0781	10.771	11.2713	6.06084	6.38489	2.04078	2.41462	-0.480827	-0.020923
131.84	75.9794	76.3672	57.4487	58.0845	43.9677	44.7731	31.4157	32.2022	20.5331	21.1161	10.8236	11.2969	6.07062	6.39985	2.0358	2.42278	-0.487381	-0.0166642
132.84	76.0329	76.4526	57.4912	58.1721	44.0228	44.8383	31.4702	32.252	20.5785	21.1537	10.8602	11.3222	6.08808	6.41463	2.0324	2.43084	-0.484143	-0.012456
133.84	76.1124	76.537	57.5701	58.2591	44.0713	44.9032	31.5389	32.3012	20.6105	21.1908	10.8933	11.3471	6.11881	6.42923	2.04797	2.4388	-0.476768	-0.0083
134.84	76.189	76.6203	57.6366	58.3455	44.1426	44.9676	31.6108	32.35	20.6514	21.2274	10.9412	11.3717	6.15776	6.44365	2.08028	2.44667	-0.472196	-0.00419
135.84	76.2357	76.7025	57.7002	58.4312	44.2044	45.0315	31.6769	32.3983	20.6635	21.2636	10.9674	11.3961	6.17999	6.45789	2.09439	2.45445	-0.489334	-0.000127
136.84	76.2728	76.7838	57.7315	58.5164	44.2659	45.0951	31.7202	32.4461	20.712	21.2994	10.9931	11.4201	6.21838	6.47197	2.12012	2.46213	-0.472977	0.00389
137.84	76.3009	76.864	57.7888	58.6009	44.322	45.1583	31.782	32.4934	20.7516	21.3348	11.0238	11.4438	6.25487	6.48587	2.14145	2.46973	-0.455152	0.00785
138.84	76.3508	76.9433	57.8573	58.6848	44.3832	45.2212	31.822	32.5403	20.7822	21.3697	11.0522	11.4673	6.27721	6.49961	2.16074	2.47723	-0.424541	0.0117755
139.84	76.4041	77.0215	57.9194	58.7681	44.417	45.2836	31.8746	32.5868	20.812	21.4042	11.0852	11.4905	6.28753	6.51319	2.15295	2.48465	-0.430305	0.0156516
140.84	76.438	77.0988	57.9502	58.8508	44.4541	45.3456	31.9273	32.6328	20.8595	21.4384	11.0953	11.5134	6.30527	6.52661	2.16098	2.49198	-0.42555	0.0194832
141.84	76.4786	77.1751	58.0076	58.9329	44.4945	45.4073	31.9947	32.6784	20.8918	21.4721	11.0975	11.536	6.30174	6.53988	2.15747	2.49923	-0.412979	0.023271
142.84	76.5153	77.2505	58.0483	59.0145	44.5537	45.4687	32.0402	32.7236	20.9223	21.5055	11.1305	11.5583	6.31964	6.55298	2.1656	2.5064	-0.413361	0.0270158
143.84	76.5627	77.3249	58.0991	59.0954	44.6048	45.5297	32.0905	32.7684	20.978	21.5385	11.15	11.5804	6.34533	6.56594	2.17177	2.51348	-0.405322	0.0307182
144.84	76.598	77.3984	58.158	59.1758	44.6566	45.5903	32.1366	32.8128	21.031	21.5711	11.1752	11.6023	6.37059	6.57875	2.17396	2.52048	-0.409368	0.0343788
145.84	76.6295	77.471	58.1905	59.2556	44.6959	45.6506	32.1752	32.8568	21.0721	21.6034	11.1977	11.6238	6.37074	6.59141	2.15451	2.5274	-0.410782	0.0379984
146.84	76.6487	77.5427	58.2198	59.3348	44.7484	45.7105	32.208	32.9005	21.1123	21.6353	11.2181	11.6452	6.37221	6.60393	2.15606	2.53425	-0.401103	0.0415775
147.84	76.6759	77.6135	58.2627	59.4135	44.8161	45.7701	32.2415	32.9438	21.1311	21.6669	11.2359	11.6663	6.3894	6.6163	2.15334	2.54102	-0.412109	0.0451169
148.84	76.6775	77.6834	58.2904	59.4915	44.8404	45.8294	32.2651	32.9867	21.145	21.6982	11.244	11.6871	6.37203	6.62854	2.16219	2.54771	-0.414886	0.0486172
149.84	76.6807	77.7525	58.3116	59.5691	44.8616	45.8884	32.3041	33.0293	21.1556	21.7291	11.2302	11.7078	6.35652	6.64064	2.14849	2.55433	-0.418751	0.0520789
150.84	76.6935	77.8206	58.3412	59.6461	44.886	45.947	32.3515	33.0715	21.1805	21.7597	11.2211	11.7281	6.38808	6.65261	2.16176	2.56088	-0.413359	0.0555027
151.84	76.6983	77.888	58.3948	59.7225	44.9183	46.0053	32.3861	33.1134	21.2147	21.79	11.241	11.7483	6.41093	6.66444	2.16517	2.56735	-0.420109	0.0588891
152.84	76.7191	77.9545	58.4092	59.7984	44.959	46.0633	32.4174	33.155	21.2725	21.8199	11.2474	11.7683	6.43081	6.67615	2.19355	2.57375	-0.409312	0.0622388
153.84	76.7559	78.0201	58.4487	59.8737	45.007	46.121	32.4794	33.1963	21.3034	21.8496	11.2785	11.788	6.47808	6.68772	2.21466	2.58009	-0.391721	0.0655523
154.84	76.7963	78.085	58.4815	59.9485	45.0574	46.1784	32.5091	33.2372	21.3335	21.879	11.3074	11.8075	6.50007	6.69917	2.2315	2.58635	-0.37957	0.0688303
155.84	76.8279	78.149	58.5287	60.0228	45.0907	46.2355	32.5453	33.2778	21.3507	21.9081	11.3237	11.8268	6.5207	6.7105	2.23423	2.59255	-0.390117	0.0720732
156.84	76.8573	78.2123	58.5517	60.0965	45.1312	46.2923	32.5916	33.3182	21.3662	21.9369	11.338	11.8459	6.52481	6.7217	2.21693	2.59868	-0.387882	0.0752816
157.84	76.8784	78.2747	58.5467	60.1698	45.1592	46.3488	32.6374	33.3583	21.4031	21.9654	11.3529	11.8648	6.51378	6.73279	2.22457	2.60475	-0.398204	0.0784561
158.84	76.8978	78.3364	58.5616	60.2424	45.1913	46.405	32.6769	33.398	21.4342	21.9937	11.3654	11.8835	6.5238	6.74376	2.23741	2.61075	-0.39835	0.0815971
159.84	76.9162	78.3973	58.5845	60.3146	45.2263	46.4609	32.7074	33.4375	21.471	22.0217	11.3865	11.902	6.53281	6.75461	2.2236	2.61669	-0.389341	0.0847052
160.84	76.9385	78.4575	58.6104	60.3863	45.2585	46.5165	32.7522	33.4767	21.5105	22.0494	11.403	11.9203	6.53328	6.76535	2.22728	2.62257	-0.397068	0.087781
161.84	76.949	78.5169	58.6416	60.4574	45.2966	46.5719	32.7745	33.5157	21.5241	22.0769	11.4135	11.9385	6.54053	6.77598	2.23618	2.62839	-0.401454	0.0908249
162.84	76.9542	78.5756	58.6612	60.5281	45.323	46.6269	32.8002	33.5544	21.5341	22.1041	11.4178	11.9564	6.53041	6.7865	2.19856	2.63414	-0.419143	0.0938374
163.84	76.9428	78.6335	58.6596	60.5982	45.3346	46.6817	32.823	33.5928	21.5357	22.1311	11.4065	11.9742	6.53227	6.79691	2.18682	2.63984	-0.457053	0.096819
164.84	76.949	78.6907	58.6431	60.6678	45.3701	46.7362	32.848	33.631	21.5518	22.1578	11.4115	11.9917	6.5207	6.80722	2.17719	2.64548	-0.471766	0.0997702
165.84	76.9506	78.7473	58.6514	60.737	45.4108	46.7905	32.876	33.6689	21.5771	22.1843	11.4213	12.0092	6.52488	6.81742	2.15676	2.65106	-0.507023	0.102691
166.84	76.9617	78.8031	58.6712	60.8056	45.4614	46.8444	32.9004	33.7066	21.6189	22.2106	11.4284	12.0264	6.5569	6.82751	2.16887	2.65659	-0.506175	0.105583
167.84	76.993	78.8582	58.7151	60.8738	45.5059	46.8982	32.9455	33.744	21.6727	22.2366	11.4616	12.0435	6.56972	6.83751	2.1723	2.66206	-0.528671	0.108446
168.84	77.0072	78.9126	58.7593	60.9415	45.5296	46.9516	32.989	33.7813	21.7249	22.2624	11.4927	12.0604	6.58598	6.84741	2.16552	2.66747	-0.527561	0.11128
169.84	77.0275	78.9663	58.7908	61.0086	45.5584	47.0048	33.0374	33.8182	21.7336	22.288	11.5145	12.0771	6.5912	6.85721	2.16254	2.67284	-0.548521	0.114086
170.84	77.0341	79.0194	58.8198	61.0754	45.5958	47.0577	33.075	33.855	21.7432	22.3134	11.5212	12.0937	6.58156	6.86691	2.1725	2.67815	-0.577694	0.116865
171.84	77.0371	79.0718	58.856	61.1416	45.6281	47.1104	33.1127	33.8915	21.7339	22.3386	11.527	12.1101	6.57865	6.87652	2.18437	2.6834	-0.608335	0.119616
172.84	77.0229	79.1236	58.8784	61.2073	45.6449	47.1628	33.1369	33.9279	21.7275	22.3635	11.5033	12.1264	6.54442	6.88604	2.16842	2.68861	-0.663661	0.12234
173.84	77.0057	79.1747	58.8623	61.2726	45.6459	47.2149	33.1374	33.964	21.7191	22.3883	11.472	12.1425	6.50668	6.89546	2.12021	2.69376	-0.724519	0.125038
174.84	76.99	79.2252	58.8506	61.3375	45.6546	47.2668	33.1319	33.9999	21.7368	22.4129	11.4455	12.1585	6.4818	6.9048	2.09071	2.69887	-0.764098	0.127709
175.84	76.9921	79.2751	58.8607	61.4018	45.6455	47.3185	33.1511	34.0356	21.7474	22.4373	11.4421	12.1743	6.4514	6.91405	2.05588	2.70393	-0.787538	0.130356
176.84	76.9651	79.3243	58.8588	61.4657	45.6198	47.3699	33.1569	34.0711	21.7267	22.4614	11.4183	12.19	6.39633	6.92321	1.99853	2.70893	-0.842683	0.132976
177.84	76.9031	79.3729	58.8197	61.5292	45.5659	47.4211	33.1337	34.1064	21.6725	22.4854	11.3821	12.2055	6.33077	6.93228	1.92517	2.7139	-0.910116	0.135573
178.84	76.8345	79.4209	58.7784	61.5922	45.5102	47.472	33.0828	34.1415	21.661	22.5092	11.3325	12.2209	6.27476	6.94127	1.884	2.71881	-0.990729	0.138144
179.84	91.1729	79.4684	58.7315	61.6548	49.8625	47.5227	32.2877	34.1764	22.9789	22.5329	10.1267	12.2362	7.23828	6.95018	2.55946	2.72368	-0.33161	0.140692
180.84	66.8056	79.3255	64.4	61.7169	43.2174	48.9367	34.379	34.0338	20.8762	21.0687	11.9966	12.2073	4.93553	6.52631	0.128832	3.39866	-3.13309	1.73542
181.84	82.2805	78.4985	55.9937	64.9953	49.5935	48.3419	34.4713	33.5928	23.8747	20.7856	12.2208	12.0397	7.6145	6.43585	3.11086	3.35129	0.164172	1.71117
182.84	82.8061	77.6841	64.2649	64.2665	49.4114	47.7564	36.337	33.1588	23.7495	20.5071	13.4019	11.8747	7.90783	6.34682	3.48417	3.30469	0.658731	1.6873
183.84	82.403	76.8822	63.8136	63.5491	48.7354	47.18	35.9281	32.7316	23.2695	20.233	13.3494	11.7123	7.71371	6.25921	3.39942	3.25882	0.680629	1.66382
184.84	81.6896	76.0926	62.9963	62.8427	47.9322	46.6127	35.2369	32.3112	22.7057	19.9633	12.982	11.5525	7.50306	6.173	3.26855	3.21368	0.603571	1.6407
185.84	80.8	75.3151	62.1941	62.1473	47.0968	46.0543	34.5596	31.8974	22.1625	19.6978	12.6578	11.3953	7.2606	6.08816	3.13742	3.16926	0.542751	1.61796
186.84	79.8506	74.5495	61.2382	61.4627	46.2698	45.5047	33.8665	31.4902	21.6718	19.4365	12.2959	11.2405	7.02771	6.00467	2.97336	3.12555	0.456743	1.59557
187.84	78.8893	73.7955	60.287	60.7886	45.4849	44.9636	33.2496	31.0894	21.2091	19.1794	11.9356	11.0882	6.83776	5.9225	2.86371	3.08253	0.381245	1.57355
188.84	77.916	73.053	59.4346	60.125	44.732	44.431	32.6823	30.6949	20.7445	18.9263	11.6652	10.9384	6.6821	5.84164	2.77804	3.0402	0.336912	1.55187
189.84	76.9476	72.3218	58.539	59.4716	44.0534	43.9067	32.0722	30.3066	20.3842	18.6773	11.4519	10.7909	6.54436	5.76206	2.71727	2.99853	0.306991	1.53054
190.84	75.9871	71.6018	57.7269	58.8283	43.353	43.3906	31.5155	29.9245	19.9787	18.4322	11.197	10.6457	6.39018	5.68375	2.65449	2.95753	0.270306	1.50954
191.84	75.039	70.8927	56.8773	58.1949	42.6382	42.8826	30.9819	29.5484	19.6	18.191	10.9388	10.5029	6.23088	5.60668	2.57332	2.91719	0.225143	1.48888
192.84	74.0756	70.1943	56.0666	57.5713	42.0116	42.3825	30.4488	29.1782	19.2804	17.9535	10.704	10.3623	6.08244	5.53083	2.49519	2.87748	0.184907	1.46855
193.84	73.1281	69.5065	55.2593	56.9572	41.4331	41.8902	29.9784	28.8138	18.934	17.7199	10.5048	10.2239	5.97315	5.45619	2.39879	2.8384	0.147019	1.44854
194.84	72.2593	68.8292	54.4705	56.3526	40.785	41.4055	29.5086	28.4552	18.5937	17.4899	10.304	10.0877	5.84338	5.38273	2.3284	2.79994	0.113813	1.42885
195.84	71.3678	68.162	53.7023	55.7573	40.1759	40.9284	29.059	28.1022	18.3071	17.2636	10.118	9.95374	5.71541	5.31044	2.26879	2.7621	0.0757036	1.40947
196.84	70.4656	67.505	52.9412	55.1711	39.571	40.4587	28.6342	27.7547	18.0299	17.0408	9.9178	9.82185	5.58698	5.23929	2.20082	2.72485	0.0488319	1.3904
197.84	69.6018	66.8579	52.2545	54.5939	39.0276	39.9964	28.1952	27.4127	17.7392	16.8216	9.73538	9.69205	5.47599	5.16927	2.12233	2.68819	0.00658	1.37163
198.84	68.7856	66.2205	51.599	54.0256	38.5109	39.5411	27.7647	27.0761	17.4521	16.6058	9.54392	9.56431	5.36862	5.10035	2.07403	2.65212	-0.0304737	1.35316
199.84	68.0155	65.5927	50.9359	53.4659	38.01	39.093	27.3765	26.7447	17.162	16.3934	9.36623	9.43859	5.24999	5.03253	2.01273	2.61661	-0.0530205	1.33498
200.84	67.2131	64.9744	50.2858	52.9148	37.5197	38.6518	27.0157	26.4186	16.8977	16.1844	9.21563	9.31485	5.16706	4.96578	1.95122	2.58167	-0.0718813	1.31709
201.84	66.4285	64.3653	49.6498	52.3721	37.0308	38.2175	26.6678	26.0975	16.6591	15.9787	9.08149	9.19307	5.0612	4.90009	1.89543	2.54728	-0.117587	1.29948
202.84	65.7103	63.7654	49.0339	51.8376	36.5752	37.7898	26.3161	25.7815	16.4452	15.7762	8.9179	9.07321	4.98629	4.83544	1.84981	2.51344	-0.143671	1.28215
203.84	65.0178	63.1744	48.5096	51.3113	36.1334	37.3688	25.9933	25.4704	16.2352	15.5769	8.78791	8.95524	4.94276	4.77181	1.82426	2.48013	-0.146173	1.2651
204.84	64.3163	62.5923	47.9983	50.7931	35.6898	36.9543	25.687	25.1642	15.9976	15.3807	8.66637	8.83914	4.87664	4.70918	1.7797	2.44735	-0.163078	1.24832
205.84	63.6097	62.0189	47.3995	50.2827	35.2381	36.5462	25.3507	24.8628	15.8036	15.1876	8.52022	8.72487	4.7971	4.64755	1.75908	2.41508	-0.184021	1.2318
206.84	62.9773	61.454	46.8608	49.78	34.8657	36.1444	25.0349	24.5661	15.5896	14.9975	8.38443	8.6124	4.72022	4.58688	1.7232	2.38333	-0.200354	1.21554
207.84	62.3377	60.8976	46.3506	49.285	34.4748	35.7488	24.7316	24.274	15.3988	14.8105	8.23731	8.50171	4.64882	4.52718	1.67954	2.35207	-0.203014	1.19954
208.84	61.6937	60.3494	45.8131	48.7975	34.0593	35.3593	24.4264	23.9865	15.1759	14.6263	8.08532	8.39276	4.56947	4.46842	1.64238	2.32132	-0.228518	1.18379
209.84	61.0628	59.8094	45.3147	48.3174	33.6488	34.9758	24.1229	23.7034	14.9836	14.4451	7.9574	8.28552	4.48523	4.41058	1.59915	2.29104	-0.23769	1.16829
210.84	60.4298	59.2774	44.8261	47.8445	33.2641	34.5981	23.8442	23.4248	14.7915	14.2667	7.84005	8.17997	4.40093	4.35366	1.55392	2.26125	-0.270042	1.15303
211.84	59.852	58.7533	44.3428	47.3788	32.8988	34.2263	23.5905	23.1505	14.5949	14.0911	7.73083	8.07609	4.3399	4.29763	1.51594	2.23192	-0.288409	1.13802
212.84	59.265	58.2369	43.8557	46.9201	32.5588	33.8602	23.3394	22.8805	14.4036	13.9182	7.6254	7.97384	4.26113	4.24248	1.47466	2.20306	-0.327419	1.12324
213.84	58.7189	57.7282	43.3838	46.4683	32.2365	33.4997	23.0785	22.6147	14.2132	13.7481	7.5256	7.87319	4.19805	4.18821	1.45259	2.17465	-0.347927	1.1087
214.84	58.184	57.227	42.9605	46.0233	31.9077	33.1448	22.8256	22.353	14.0341	13.5806	7.41424	7.77413	4.11393	4.13479	1.41731	2.14669	-0.378512	1.09438
215.84	57.6314	56.7331	42.5244	45.585	31.5849	32.7953	22.5777	22.0954	13.8694	13.4157	7.3049	7.67663	4.03085	4.0822	1.37525	2.11917	-0.409255	1.08029
216.84	57.1023	56.2466	42.0928	45.1533	31.2882	32.4511	22.3269	21.8417	13.7216	13.2535	7.19509	7.58065	3.9698	4.03045	1.33528	2.09208	-0.427737	1.06642
217.84	56.5652	55.7671	41.6826	44.7281	30.9796	32.1122	22.0999	21.5921	13.5828	13.0937	7.0833	7.48618	3.913	3.97951	1.29637	2.06542	-0.456878	1.05277
218.84	56.057	55.2948	41.3018	44.3092	30.6788	31.7784	21.878	21.3462	13.4279	12.9365	6.99392	7.3932	3.8444	3.92937	1.26027	2.03917	-0.484775	1.03934
219.84	55.5638	54.8293	40.9472	43.8966	30.3674	31.4498	21.6453	21.1042	13.293	12.7817	6.91876	7.30167	3.79941	3.88001	1.23364	2.01334	-0.500075	1.02611
220.84	55.0472	54.3706	40.5846	43.4902	30.0695	31.1262	21.4459	20.866	13.1558	12.6293	6.83247	7.21157	3.75201	3.83144	1.19758	1.98792	-0.506838	1.0131
221.84	54.5834	53.9187	40.1842	43.0898	29.7888	30.8075	21.2136	20.6314	13.0048	12.4793	6.73673	7.12289	3.69237	3.78362	1.16411	1.9629	-0.527035	1.00029
222.84	54.1256	53.4733	39.8135	42.6955	29.5288	30.4936	21.0198	20.4004	12.8741	12.3316	6.67509	7.0356	3.64183	3.73655	1.12645	1.93827	-0.528747	0.987678
223.84	53.6781	53.0344	39.4573	42.3069	29.2433	30.1845	20.8201	20.173	12.7259	12.1862	6.57399	6.94967	3.57565	3.69022	1.08645	1.91402	-0.537892	0.975266
224.84	53.2392	52.6019	39.1155	41.9242	28.9427	29.8801	20.6168	19.9491	12.5761	12.0431	6.46387	6.86508	3.51366	3.64462	1.03774	1.89016	-0.565517	0.963049
225.84	52.8123	52.1756	38.7741	41.5472	28.6877	29.5804	20.4195	19.7287	12.461	11.9022	6.3754	6.78182	3.47051	3.59973	1.01575	1.86666	-0.575863	0.951024
226.84	52.3592	51.7556	38.4522	41.1757	28.4487	29.2851	20.2308	19.5117	12.3599	11.7635	6.29912	6.69985	3.42992	3.55555	0.985168	1.84354	-0.588318	0.939187
227.84	51.9344	51.3416	38.1335	40.8098	28.2101	28.9944	20.0573	19.298	12.2429	11.627	6.22576	6.61917	3.38171	3.51205	0.946405	1.82078	-0.597464	0.927535
228.84	51.5378	50.9336	37.8248	40.4492	27.9327	28.708	19.8948	19.0876	12.1052	11.4926	6.15224	6.53975	3.33382	3.46924	0.91649	1.79838	-0.624267	0.916066
229.84	51.0935	50.5315	37.5045	40.094	27.6974	28.426	19.7203	18.8804	11.9919	11.3602	6.06837	6.46156	3.27245	3.42709	0.884815	1.77632	-0.637966	0.904777
230.84	50.6863	50.1351	37.1944	39.744	27.4605	28.1482	19.5471	18.6764	11.8568	11.2299	5.9908	6.38459	3.21432	3.3856	0.849345	1.75462	-0.648824	0.893664
231.84	50.3167	49.7445	36.8721	39.3992	27.2409	27.8746	19.3869	18.4756	11.7339	11.1017	5.90426	6.30883	3.1653	3.34476	0.810072	1.73325	-0.665438	0.882725
232.84	49.9237	49.3594	36.5647	39.0595	27.0049	27.6051	19.2183	18.2778	11.5964	10.9754	5.80476	6.23424	3.09963	3.30456	0.778795	1.71221	-0.703367	0.871958
233.84	49.5198	48.9799	36.2756	38.7247	26.7906	27.3397	19.0401	18.0831	11.4859	10.8511	5.72547	6.16081	3.0383	3.26499	0.766294	1.6915	-0.733843	0.861358
234.84	49.1185	48.6058	36.014	38.3949	26.5821	27.0783	18.8746	17.8913	11.3581	10.7287	5.64249	6.08852	2.97551	3.22603	0.73982	1.67112	-0.765384	0.850924
235.84	48.744	48.237	35.7236	38.0699	26.3807	26.8208	18.6987	17.7025	11.2441	10.6082	5.56175	6.01736	2.92385	3.18768	0.717459	1.65105	-0.785791	0.840652
236.84	48.4038	47.8735	35.4424	37.7496	26.1877	26.5671	18.5449	17.5165	11.1429	10.4895	5.48329	5.9473	2.89105	3.14992	0.695982	1.6313	-0.805712	0.830541
237.84	48.0441	47.5152	35.153	37.4341	25.9897	26.3173	18.4046	17.3334	11.0544	10.3727	5.41005	5.87833	2.82561	3.11275	0.677812	1.61185	-0.836761	0.820588
238.84	47.7061	47.1619	34.8737	37.1231	25.7788	26.0712	18.2562	17.1531	10.9368	10.2577	5.35966	5.81043	2.78655	3.07616	0.646958	1.59271	-0.838317	0.81079
239.84	47.3577	46.8136	34.6155	36.8166	25.571	25.8288	18.1073	16.9756	10.8255	10.1444	5.29274	5.74358	2.74362	3.04014	0.62707	1.57387	-0.846883	0.801144
240.84	47.015	46.4703	34.3655	36.5147	25.3818	25.5899	17.9582	16.8007	10.7343	10.0329	5.23153	5.67777	2.70311	3.00468	0.586567	1.55532	-0.847927	0.791648
241.84	46.6516	46.1318	34.1155	36.217	25.1871	25.3547	17.8072	16.6285	10.6285	9.9231	5.17173	5.61298	2.65948	2.96977	0.541375	1.53705	-0.881797	0.7823
242.84	46.3284	45.7981	33.8311	35.9238	24.9865	25.1229	17.6449	16.4589	10.5356	9.815	5.09923	5.54918	2.6158	2.9354	0.526999	1.51907	-0.876642	0.773098
243.84	45.9987	45.469	33.5799	35.6347	24.7955	24.8946	17.5011	16.2919	10.4449	9.70855	5.04423	5.48638	2.58557	2.90156	0.504957	1.50137	-0.877581	0.764038
244.84	45.6705	45.1446	33.3166	35.3498	24.6061	24.6697	17.3487	16.1274	10.3284	9.60374	4.97118	5.42454	2.53597	2.86825	0.469805	1.48395	-0.894773	0.755119
245.84	45.3357	44.8247	33.0666	35.0691	24.433	24.4481	17.2004	15.9655	10.2343	9.50053	4.89707	5.36366	2.48787	2.83545	0.447895	1.46679	-0.916683	0.746339
246.84	45.0265	44.5093	32.8284	34.7923	24.2534	24.2298	17.0519	15.8059	10.1366	9.39891	4.83525	5.30372	2.44183	2.80316	0.426451	1.4499	-0.9182	0.737694
247.84	44.737	44.1982	32.5959	34.5196	24.0811	24.0148	16.93	15.6488	10.0636	9.29884	4.77626	5.2447	2.42268	2.77137	0.407304	1.43327	-0.917815	0.729184
248.84	44.4584	43.8915	32.3854	34.2508	23.9006	23.8029	16.818	15.4941	9.98465	9.20031	4.72248	5.1866	2.39296	2.74007	0.385792	1.4169	-0.936214	0.720805
249.84	44.1827	43.5891	32.1616	33.9858	23.7491	23.5941	16.6994	15.3417	9.90504	9.10327	4.66521	5.12938	2.36218	2.70925	0.364771	1.40078	-0.957235	0.712557
250.84	43.9037	43.2908	31.9455	33.7246	23.5861	23.3884	16.5894	15.1916	9.83329	9.00772	4.59766	5.07305	2.333	2.67891	0.345356	1.38491	-0.960232	0.704435
251.84	43.6253	42.9967	31.735	33.4671	23.4484	23.1857	16.4791	15.0437	9.75445	8.91363	4.55291	5.01758	2.30339	2.64904	0.325513	1.36929	-0.965243	0.69644
252.84	43.3222	42.7066	31.5338	33.2133	23.2644	22.986	16.3834	14.8981	9.66831	8.82097	4.50075	4.96296	2.26608	2.61963	0.299922	1.35391	-0.994344	0.688567
253.84	43.0724	42.4205	31.326	32.9631	23.1095	22.7893	16.2524	14.7547	9.585	8.72972	4.44681	4.90919	2.23199	2.59067	0.285361	1.33876	-1.00735	0.680817
254.84	42.8168	42.1383	31.1334	32.7165	22.9616	22.5954	16.1373	14.6134	9.49559	8.63986	4.41287	4.85623	2.19499	2.56215	0.279219	1.32385	-1.00839	0.673186
255.84	42.5585	41.86	30.9455	32.4734	22.839	22.4044	16.0233	14.4742	9.40796	8.55137	4.36852	4.80409	2.18425	2.53408	0.270032	1.30917	-1.01252	0.665672
256.84	42.283	41.5855	30.7479	32.2337	22.699	22.2161	15.9226	14.3371	9.35262	8.46422	4.34552	4.75275	2.16327	2.50643	0.268983	1.29471	-1.02528	0.658275
257.84	41.9902	41.3148	30.5452	31.9974	22.5468	22.0306	15.8166	14.2021	9.26929	8.37839	4.31814	4.70219	2.12565	2.47921	0.250898	1.28048	-1.03516	0.650991
258.84	41.7272	41.0477	30.3459	31.7644	22.3932	21.8478	15.7022	14.0691	9.18683	8.29386	4.26512	4.6524	2.09709	2.45241	0.22078	1.26646	-1.0524	0.643819
259.84	41.4771	40.7842	30.1467	31.5347	22.2595	21.6676	15.5831	13.9381	9.12423	8.21062	4.22694	4.60338	2.06691	2.42601	0.218334	1.25266	-1.0564	0.636757
260.84	41.2487	40.5243	29.9752	31.3082	22.114	21.4901	15.4681	13.809	9.07222	8.12863	4.18468	4.5551	2.04459	2.40003	0.187805	1.23907	-1.07365	0.629804
261.84	41.0022	40.268	29.7854	31.0849	21.9573	21.3152	15.3726	13.6819	8.98761	8.04788	4.13622	4.50756	2.00725	2.37444	0.150469	1.22569	-1.09302	0.622958
262.84	40.7342	40.015	29.5682	30.8647	21.8022	21.1427	15.2472	13.5566	8.91464	7.96835	4.07176	4.46075	1.97522	2.34924	0.118437	1.21252	-1.10707	0.616217
263.84	40.4823	39.7655	29.3834	30.6475	21.6452	20.9728	15.1461	13.4332	8.84641	7.89002	4.01845	4.41464	1.94573	2.32442	0.100664	1.19955	-1.11352	0.609579
264.84	40.2291	39.5193	29.1873	30.4334	21.5013	20.8053	15.05	13.3117	8.78348	7.81287	3.97364	4.36924	1.91405	2.29999	0.0705452	1.18677	-1.12567	0.603042
265.84	39.9905	39.2764	29.0241	30.2223	21.3608	20.6402	14.9651	13.1919	8.72453	7.73688	3.92469	4.32452	1.89261	2.27592	0.0573101	1.17419	-1.13735	0.596606
266.84	39.7437	39.0368	28.8537	30.0141	21.2167	20.4775	14.8655	13.0739	8.64859	7.66204	3.87048	4.28049	1.86744	2.25223	0.0481701	1.1618	-1.16446	0.590268
267.84	39.5002	38.8003	28.6678	29.8088	21.0928	20.3172	14.7593	12.9577	8.58722	7.58832	3.82372	4.23712	1.82912	2.22889	0.0508585	1.14961	-1.16489	0.584027
268.84	39.2588	38.567	28.4979	29.6063	20.9623	20.1591	14.6609	12.8431	8.50749	7.5157	3.77383	4.19441	1.78526	2.20591	0.0281687	1.13759	-1.18602	0.577881
269.84	39.044	38.3367	28.3162	29.4066	20.8405	20.0033	14.58	12.7303	8.44562	7.44417	3.72548	4.15235	1.77385	2.18328	0.0170755	1.12576	-1.20532	0.571828
270.84	38.8252	38.1095	28.1565	29.2097	20.7038	19.8497	14.5159	12.6191	8.38637	7.37372	3.69325	4.11092	1.75374	2.16099	0.00829	1.11411	-1.21722	0.565868
271.84	38.6213	37.8853	27.9799	29.0155	20.5881	19.6983	14.4308	12.5096	8.32332	7.30431	3.66583	4.07012	1.72186	2.13904	-0.00406	1.10264	-1.21159	0.559999
272.84	38.4242	37.664	27.8147	28.8239	20.489	19.5491	14.3498	12.4017	8.28375	7.23594	3.63455	4.02993	1.70338	2.11742	-0.0127745	1.09134	-1.21875	0.554219
273.84	38.2138	37.4457	27.6565	28.6349	20.3767	19.402	14.2891	12.2953	8.2323	7.1686	3.6088	3.99035	1.6996	2.09613	-0.0228081	1.08022	-1.21121	0.548527
274.84	38.0049	37.2301	27.4948	28.4485	20.2706	19.257	14.2206	12.1905	8.18274	7.10225	3.58525	3.95137	1.69066	2.07516	-0.033309	1.06926	-1.21664	0.542921
275.84	37.7863	37.0174	27.3526	28.2646	20.1632	19.114	14.1268	12.0872	8.11753	7.0369	3.55153	3.91297	1.64498	2.05451	-0.0610857	1.05847	-1.23613	0.5374
276.84	37.5523	36.8074	27.176	28.0833	20.0437	18.973	14.0256	11.9855	8.065	6.97251	3.50759	3.87515	1.60573	2.03417	-0.0908985	1.04784	-1.26251	0.531963
277.84	37.3127	36.6002	27.0174	27.9043	19.9151	18.8341	13.9206	11.8852	7.99815	6.90909	3.46082	3.8379	1.57483	2.01414	-0.112032	1.03737	-1.27349	0.526609
278.84	37.0913	36.3956	26.867	27.7278	19.8066	18.6971	13.8083	11.7864	7.92125	6.8466	3.41931	3.8012	1.5487	1.99441	-0.140109	1.02706	-1.2918	0.521335
279.84	36.8736	36.1937	26.7284	27.5537	19.6771	18.562	13.7058	11.689	7.84284	6.78504	3.36974	3.76506	1.51913	1.97497	-0.167733	1.01691	-1.33114	0.516141
280.84	36.6607	35.9943	26.5584	27.3819	19.5556	18.4288	13.6085	11.5931	7.76801	6.72439	3.32213	3.72945	1.46889	1.95583	-0.188669	1.0069	-1.34387	0.511025
281.84	36.4592	35.7975	26.408	27.2124	19.4424	18.2975	13.5186	11.4985	7.71631	6.66463	3.28401	3.69438	1.44494	1.93698	-0.20286	0.997053	-1.34634	0.505987
282.84	36.2535	35.6032	26.2557	27.0452	19.3198	18.168	13.4467	11.4053	7.65114	6.60576	3.23004	3.65983	1.41726	1.9184	-0.227023	0.987351	-1.36269	0.501024
283.84	36.0771	35.4114	26.0893	26.8802	19.2024	18.0403	13.3438	11.3134	7.585	6.54775	3.1804	3.6258	1.40347	1.90011	-0.234168	0.977794	-1.35851	0.496136
284.84	35.8991	35.222	25.944	26.7174	19.0847	17.9144	13.2772	11.2229	7.53746	6.4906	3.14293	3.59227	1.36724	1.88209	-0.260625	0.968381	-1.38497	0.491322
285.84	35.7096	35.035	25.7885	26.5567	18.9655	17.7902	13.1886	11.1337	7.47882	6.43428	3.09383	3.55924	1.32659	1.86434	-0.289961	0.959109	-1.39477	0.48658
286.84	35.499	34.8504	25.6369	26.3982	18.8529	17.6678	13.1105	11.0457	7.4159	6.3788	3.06544	3.52671	1.30468	1.84686	-0.302029	0.949976	-1.40496	0.481909
287.84	35.2995	34.6681	25.4963	26.2418	18.7468	17.547	13.0369	10.9591	7.33979	6.32412	3.032	3.49465	1.28601	1.82963	-0.319219	0.940979	-1.41427	0.477308
288.84	35.1244	34.488	25.3573	26.0874	18.6485	17.4279	12.9458	10.8736	7.28512	6.27025	3.00052	3.46307	1.28335	1.81266	-0.315225	0.932117	-1.41848	0.472776
289.84	34.9296	34.3102	25.2432	25.9351	18.5452	17.3105	12.9053	10.7894	7.24566	6.21716	2.98318	3.43196	1.26375	1.79595	-0.319994	0.923388	-1.42325	0.468311
290.84	34.7588	34.1346	25.1077	25.7847	18.4526	17.1946	12.8312	10.7064	7.19523	6.16485	2.96259	3.40131	1.25393	1.77948	-0.341204	0.914788	-1.43462	0.463914
291.84	34.5718	33.9612	24.9666	25.6363	18.3456	17.0804	12.7678	10.6246	7.13745	6.1133	2.94216	3.37111	1.23717	1.76326	-0.341799	0.906317	-1.44318	0.459582
292.84	34.3912	33.7899	24.8182	25.4898	18.2552	16.9677	12.6824	10.5439	7.08582	6.06251	2.90684	3.34136	1.2246	1.74728	-0.350933	0.897971	-1.45224	0.455314
293.84	34.2178	33.6207	24.678	25.3453	18.1537	16.8565	12.6186	10.4644	7.04633	6.01244	2.87584	3.31204	1.18511	1.73153	-0.370569	0.88975	-1.45577	0.45111
294.84	34.0397	33.4537	24.5271	25.2026	18.0623	16.7469	12.5366	10.386	6.99503	5.96311	2.83023	3.28316	1.16506	1.71602	-0.401102	0.881651	-1.46801	0.446969
295.84	33.8776	33.2886	24.385	25.0617	17.9799	16.6388	12.439	10.3087	6.93683	5.91449	2.79247	3.2547	1.13773	1.70074	-0.421798	0.873671	-1.46567	0.442889
296.84	33.6901	33.1256	24.2643	24.9227	17.8807	16.5321	12.3569	10.2325	6.88566	5.86657	2.74989	3.22666	1.10444	1.68568	-0.431948	0.86581	-1.48598	0.438869
297.84	33.5163	32.9645	24.135	24.7854	17.7905	16.4268	12.2788	10.1574	6.8552	5.81935	2.69443	3.19903	1.08186	1.67085	-0.46086	0.858065	-1.47894	0.43491
298.84	33.335	32.8054	24.0159	24.6499	17.7088	16.323	12.2003	10.0833	6.79445	5.7728	2.65321	3.1718	1.0426	1.65623	-0.47394	0.850435	-1.48696	0.431008
299.84	33.1604	32.6482	23.9045	24.5161	17.6124	16.2206	12.1347	10.0103	6.72687	5.72693	2.60985	3.14497	1.02425	1.64183	-0.492689	0.842917	-1.50415	0.427165
300.84	32.9995	32.4929	23.7659	24.384	17.5136	16.1195	12.0686	9.93833	6.66714	5.68172	2.56442	3.11853	1.0067	1.62764	-0.502031	0.835509	-1.50528	0.423378
301.84	32.8381	32.3394	23.6463	24.2536	17.4147	16.0198	12.0108	9.86734	6.61827	5.63715	2.52586	3.09248	0.992216	1.61365	-0.514956	0.828211	-1.5147	0.419647
302.84	32.6639	32.1878	23.5155	24.1248	17.3073	15.9214	11.9546	9.79734	6.54816	5.59322	2.47794	3.0668	0.956469	1.59988	-0.560469	0.82102	-1.55044	0.415971
303.84	32.4967	32.0379	23.3752	23.9977	17.2216	15.8244	11.882	9.72832	6.48679	5.54992	2.44532	3.0415	0.943928	1.5863	-0.562847	0.813935	-1.55633	0.412348
304.84	32.3353	31.8899	23.2643	23.8721	17.1306	15.7286	11.8214	9.66026	6.46903	5.50724	2.40724	3.01657	0.929292	1.57292	-0.584136	0.806953	-1.54988	0.408779
305.84	32.1613	31.7436	23.171	23.7482	17.0434	15.6341	11.7626	9.59315	6.42773	5.46517	2.38892	2.992	0.898143	1.55974	-0.60082	0.800073	-1.56305	0.405263
306.84	31.9986	31.599	23.0651	23.6257	16.9607	15.5409	11.6902	9.52696	6.3866	5.42369	2.36426	2.96778	0.866779	1.54674	-0.620861	0.793294	-1.58473	0.401798
307.84	31.8646	31.4561	22.9541	23.5048	16.8709	15.4488	11.6219	9.46169	6.35301	5.3828	2.34552	2.94391	0.854295	1.53394	-0.641158	0.786614	-1.58934	0.398383
308.84	31.7367	31.3148	22.8409	23.3854	16.7738	15.358	11.5651	9.39732	6.30581	5.3425	2.31443	2.92038	0.825377	1.52132	-0.660234	0.780031	-1.58692	0.395019
309.84	31.6123	31.1752	22.7412	23.2675	16.6986	15.2684	11.5113	9.33384	6.27332	5.30276	2.29005	2.8972	0.820301	1.50889	-0.635693	0.773544	-1.58035	0.391703
310.84	31.4699	31.0372	22.6432	23.151	16.6316	15.1799	11.4673	9.27123	6.22726	5.26359	2.27212	2.87434	0.795798	1.49664	-0.64074	0.767151	-1.59548	0.388436
311.84	31.304	30.9008	22.535	23.0359	16.5505	15.0926	11.409	9.20947	6.19086	5.22496	2.2554	2.85182	0.79058	1.48456	-0.646279	0.760851	-1.6007	0.385216
312.84	31.153	30.766	22.4225	22.9222	16.4893	15.0065	11.3694	9.14856	6.16183	5.18688	2.23817	2.82962	0.790848	1.47265	-0.637802	0.754642	-1.59027	0.382043
313.84	31.0078	30.6327	22.3244	22.81	16.4227	14.9214	11.3248	9.08849	6.10722	5.14934	2.21841	2.80773	0.762413	1.46092	-0.653358	0.748523	-1.60583	0.378916
314.84	30.8384	30.5009	22.1869	22.699	16.3412	14.8375	11.257	9.02922	6.06433	5.11232	2.18262	2.78616	0.724201	1.44936	-0.66531	0.742493	-1.6163	0.375834
315.84	30.6862	30.3706	22.0744	22.5895	16.253	14.7546	11.189	8.97077	6.03333	5.07582	2.14403	2.76489	0.704515	1.43796	-0.671401	0.736549	-1.62622	0.372796
316.84	30.5397	30.2418	21.9651	22.4812	16.1553	14.6728	11.1148	8.91311	5.98527	5.03983	2.11942	2.74393	0.67639	1.42673	-0.703035	0.73069	-1.63637	0.369803
317.84	30.3914	30.1144	21.8537	22.3743	16.068	14.592	11.0455	8.85622	5.93711	5.00434	2.07986	2.72326	0.649713	1.41566	-0.728156	0.724916	-1.65172	0.366853
318.84	30.2587	29.9884	21.7475	22.2686	15.9758	14.5123	10.9712	8.80011	5.90278	4.96934	2.05482	2.70289	0.634912	1.40474	-0.741401	0.719225	-1.64504	0.363945
319.84	30.1226	29.8639	21.6385	22.1642	15.887	14.4336	10.9158	8.74474	5.86558	4.93483	2.00388	2.6828	0.617244	1.39398	-0.760625	0.713615	-1.6545	0.361078
320.84	29.9721	29.7407	21.5256	22.061	15.8049	14.3559	10.8589	8.69013	5.82706	4.9008	1.98387	2.663	0.606858	1.38337	-0.769454	0.708086	-1.65552	0.358253
321.84	29.826	29.6189	21.4096	21.959	15.7077	14.2791	10.8062	8.63624	5.76222	4.86724	1.96004	2.64348	0.579515	1.37292	-0.805006	0.702635	-1.67935	0.355468
322.84	29.6787	29.4984	21.2807	21.8583	15.6326	14.2034	10.723	8.58307	5.70671	4.83414	1.90625	2.62423	0.554872	1.36261	-0.831283	0.697262	-1.69423	0.352724
323.84	29.5217	29.3793	21.1842	21.7587	15.5557	14.1286	10.6577	8.53061	5.65851	4.8015	1.87157	2.60525	0.535967	1.35245	-0.850508	0.691966	-1.71477	0.350018
324.84	29.3714	29.2614	21.0584	21.6603	15.4757	14.0547	10.5873	8.47885	5.59077	4.7693	1.82946	2.58654	0.487758	1.34243	-0.895192	0.686744	-1.76134	0.34735
325.84	29.249	29.1448	20.9358	21.563	15.3924	13.9817	10.5203	8.42777	5.53797	4.73755	1.80274	2.56809	0.46581	1.33255	-0.926906	0.681597	-1.78329	0.344721
326.84	29.1081	29.0295	20.8346	21.4669	15.3217	13.9097	10.4408	8.37737	5.48781	4.70622	1.76649	2.5499	0.435499	1.32282	-0.941133	0.676522	-1.7975	0.342129
327.84	28.9709	28.9154	20.7346	21.3718	15.2334	13.8386	10.3847	8.32763	5.4479	4.67533	1.73124	2.53196	0.414804	1.31322	-0.967764	0.67152	-1.82453	0.339574
328.84	28.8483	28.8025	20.6236	21.2779	15.16	13.7683	10.3377	8.27855	5.41593	4.64486	1.70238	2.51427	0.392599	1.30375	-0.963785	0.666587	-1.83502	0.337054
329.84	28.7141	28.6908	20.5287	21.1851	15.068	13.6989	10.2935	8.23011	5.35032	4.6148	1.65805	2.49682	0.366126	1.29442	-0.988702	0.661724	-1.85328	0.334571
330.84	28.5946	28.5803	20.4108	21.0933	14.9895	13.6304	10.2364	8.18231	5.3223	4.58515	1.61927	2.47962	0.351311	1.28521	-0.985542	0.65693	-1.84661	0.332122
331.84	28.4695	28.471	20.3295	21.0025	14.9152	13.5627	10.17	8.13512	5.28574	4.5559	1.6106	2.46265	0.338189	1.27614	-0.988898	0.652202	-1.85192	0.329708
332.84	28.3413	28.3628	20.2216	20.9128	14.8459	13.4958	10.1202	8.08856	5.25676	4.52704	1.58505	2.44592	0.317414	1.26719	-0.999907	0.647541	-1.86137	0.327327
333.84	28.2013	28.2558	20.1479	20.824	14.7826	13.4297	10.0547	8.04259	5.21784	4.49857	1.54708	2.42942	0.296469	1.25836	-1.01774	0.642945	-1.88395	0.32498
334.84	28.0687	28.1498	20.0487	20.7363	14.7155	13.3644	9.98623	7.99722	5.17686	4.47048	1.50477	2.41315	0.275023	1.24966	-1.03098	0.638413	-1.89556	0.322666
335.84	27.9419	28.045	19.9455	20.6496	14.6259	13.3	9.92223	7.95243	5.12735	4.44277	1.47069	2.39709	0.245038	1.24108	-1.06096	0.633943	-1.91577	0.320384
336.84	27.8109	27.9412	19.8459	20.5638	14.5554	13.2363	9.85719	7.90823	5.08979	4.41543	1.42218	2.38126	0.231692	1.23262	-1.07899	0.629536	-1.93576	0.318133
337.84	27.6803	27.8385	19.7459	20.479	14.4674	13.1733	9.80771	7.86458	5.04893	4.38845	1.39051	2.36564	0.203733	1.22427	-1.10852	0.62519	-1.93552	0.315914
338.84	27.5576	27.7369	19.6444	20.3951	14.3837	13.1111	9.74912	7.8215	5.01551	4.36184	1.36231	2.35024	0.181629	1.21604	-1.12242	0.620904	-1.94598	0.313726
339.84	27.4479	27.6362	19.5569	20.3121	14.2955	13.0497	9.7085	7.77896	4.9845	4.33557	1.33348	2.33504	0.163896	1.20792	-1.13389	0.616677	-1.9559	0.311568
340.84	27.319	27.5366	19.4768	20.23	14.2217	12.989	9.65928	7.73697	4.96321	4.30965	1.32002	2.32005	0.162214	1.19991	-1.14386	0.612509	-1.95766	0.30944
341.84	27.2057	27.438	19.3752	20.1489	14.153	12.929	9.59912	7.6955	4.93176	4.28407	1.29247	2.30527	0.144288	1.19201	-1.1421	0.608397	-1.96722	0.307341
342.84	27.127	27.3403	19.2756	20.0686	14.102	12.8697	9.56374	7.65456	4.91625	4.25883	1.28118	2.29068	0.156197	1.18422	-1.12832	0.604342	-1.96009	0.305271
343.84	27.0234	27.2437	19.2217	19.9892	14.0492	12.8111	9.52787	7.61414	4.88965	4.23392	1.28325	2.27629	0.14913	1.17653	-1.10922	0.600342	-1.95895	0.303229
344.84	26.9143	27.148	19.1526	19.9106	13.9975	12.7532	9.49796	7.57422	4.86203	4.20934	1.2661	2.26209	0.139482	1.16895	-1.08449	0.596397	-1.95062	0.301216
345.84	26.7967	27.0532	19.0843	19.8328	13.9483	12.6959	9.45734	7.5348	4.83273	4.18507	1.25478	2.24808	0.11995	1.16147	-1.07472	0.592505	-1.95727	0.299229
346.84	26.6956	26.9593	18.9962	19.7559	13.8881	12.6394	9.42804	7.49587	4.80499	4.16112	1.2368	2.23426	0.112138	1.15409	-1.063	0.588667	-1.94711	0.29727
347.84	26.5941	26.8664	18.9339	19.6798	13.8355	12.5834	9.37257	7.45743	4.79276	4.13749	1.22843	2.22062	0.101463	1.14682	-1.05415	0.58488	-1.93833	0.295338
348.84	26.4729	26.7744	18.8757	19.6046	13.7568	12.5282	9.33549	7.41946	4.7395	4.11415	1.21672	2.20716	0.0677357	1.13963	-1.07811	0.581145	-1.96573	0.293432
349.84	26.358	26.6832	18.7662	19.5301	13.7007	12.4735	9.26899	7.38197	4.70499	4.09112	1.17464	2.19388	0.0527554	1.13255	-1.10285	0.57746	-1.96743	0.291551
350.84	26.253	26.5929	18.676	19.4563	13.6303	12.4195	9.22179	7.34493	4.68261	4.06839	1.1546	2.18078	0.0678768	1.12556	-1.10571	0.573824	-1.97849	0.289696
351.84	26.1468	26.5035	18.5956	19.3834	13.571	12.3661	9.1863	7.30835	4.66555	4.04594	1.14311	2.16785	0.073864	1.11866	-1.12081	0.570237	-1.98734	0.287866
352.84	26.0459	26.4149	18.5096	19.3112	13.5209	12.3133	9.14999	7.27221	4.64383	4.02378	1.11759	2.15509	0.0716743	1.11186	-1.123	0.566699	-1.98758	0.28606
353.84	25.9558	26.3272	18.4263	19.2397	13.462	12.2611	9.12562	7.23651	4.60679	4.00191	1.08728	2.14249	0.0721388	1.10514	-1.12253	0.563207	-2.00509	0.284279
354.84	25.8381	26.2402	18.3557	19.169	13.403	12.2094	9.09601	7.20125	4.5759	3.98031	1.06435	2.13006	0.0642862	1.09852	-1.14055	0.559762	-2.01645	0.282521
355.84	25.7218	26.1541	18.2674	19.0989	13.3538	12.1584	9.05881	7.16642	4.53003	3.95899	1.04528	2.1178	0.057478	1.09198	-1.13875	0.556363	-2.02326	0.280787
356.84	25.6325	26.0688	18.1776	19.0296	13.3087	12.1079	9.01568	7.132	4.49437	3.93793	1.04095	2.10569	0.0511208	1.08552	-1.13379	0.553009	-2.02766	0.279076
357.84	25.5109	25.9842	18.1139	18.961	13.2543	12.058	8.9689	7.09799	4.4375	3.91714	1.0197	2.09374	0.0352583	1.07916	-1.14777	0.549699	-2.03376	0.277388
358.84	25.3767	25.9005	18.0354	18.8931	13.1885	12.0086	8.89754	7.0644	4.37289	3.89661	0.988336	2.08194	0.000345	1.07287	-1.17519	0.546433	-2.06241	0.275722
359.84	25.2569	25.8175	17.9393	18.8259	13.1323	11.9598	8.82093	7.0312	4.34386	3.87634	0.955303	2.0703	-0.0158052	1.06667	-1.20111	0.543209	-2.06529	0.274078
360.84	25.1405	25.7352	17.8573	18.7593	13.0651	11.9115	8.75888	6.9984	4.30695	3.85632	0.939926	2.0588	-0.0347424	1.06055	-1.22981	0.540028	-2.08423	0.272455
361.84	25.0213	25.6537	17.7791	18.6934	12.9983	11.8637	8.70694	6.96599	4.2796	3.83655	0.90242	2.04746	-0.0460644	1.0545	-1.25715	0.536889	-2.10376	0.270854
362.84	24.9234	25.5729	17.7073	18.6281	12.9343	11.8165	8.65803	6.93395	4.24841	3.81702	0.871453	2.03625	-0.0839138	1.04854	-1.27703	0.533791	-2.1334	0.269274
363.84	24.8274	25.4928	17.6186	18.5635	12.8708	11.7697	8.61179	6.9023	4.22718	3.79774	0.866737	2.02519	-0.0867682	1.04265	-1.30292	0.530732	-2.1347	0.267715
364.84	24.7225	25.4134	17.5455	18.4995	12.8034	11.7235	8.56982	6.87101	4.20676	3.77869	0.853409	2.01427	-0.122039	1.03684	-1.32024	0.527714	-2.16333	0.266176
365.84	24.6295	25.3348	17.4752	18.4361	12.7221	11.6777	8.52881	6.84009	4.16594	3.75987	0.833292	2.00349	-0.144899	1.0311	-1.32981	0.524734	-2.16664	0.264657
366.84	24.5275	25.2568	17.3967	18.3733	12.6674	11.6325	8.48193	6.80953	4.15344	3.74129	0.815323	1.99285	-0.157393	1.02544	-1.32277	0.521793	-2.16782	0.263157
367.84	24.4084	25.1795	17.3248	18.3111	12.5928	11.5877	8.45068	6.77932	4.12668	3.72293	0.812393	1.98233	-0.174392	1.01985	-1.33977	0.51889	-2.1766	0.261677
368.84	24.3101	25.1028	17.2561	18.2495	12.5417	11.5434	8.41038	6.74946	4.09878	3.7048	0.793329	1.97196	-0.18236	1.01433	-1.35945	0.516024	-2.16348	0.260216
369.84	24.2076	25.0268	17.1713	18.1885	12.49	11.4995	8.36404	6.71994	4.06551	3.68688	0.758789	1.96171	-0.194549	1.00888	-1.36977	0.513195	-2.16591	0.258773
370.84	24.1252	24.9515	17.0893	18.1281	12.4581	11.4561	8.33389	6.69075	4.05441	3.66918	0.749496	1.95158	-0.195877	1.0035	-1.36476	0.510401	-2.16371	0.25735
371.84	24.0201	24.8768	17.0373	18.0682	12.4053	11.4132	8.29677	6.6619	4.01821	3.65169	0.724679	1.94159	-0.222311	0.998182	-1.37322	0.507644	-2.19179	0.255944
372.84	23.917	24.8027	16.9787	18.0089	12.3416	11.3707	8.2393	6.63338	3.98448	3.63441	0.687344	1.93171	-0.245954	0.992935	-1.39563	0.504921	-2.21606	0.254556
373.84	23.8245	24.7292	16.9061	17.9502	12.298	11.3286	8.20735	6.60518	3.96366	3.61734	0.65667	1.92196	-0.27529	0.987753	-1.3852	0.502232	-2.21697	0.253186
374.84	23.7447	24.6564	16.8362	17.8919	12.251	11.287	8.18129	6.57729	3.94443	3.60047	0.645177	1.91233	-0.296098	0.982637	-1.36537	0.499578	-2.22487	0.251833
375.84	23.6469	24.5841	16.776	17.8342	12.2003	11.2458	8.14866	6.54972	3.91734	3.58379	0.634541	1.90282	-0.308324	0.977584	-1.37449	0.496956	-2.23368	0.250497
376.84	23.5495	24.5125	16.7155	17.7771	12.1354	11.205	8.1171	6.52245	3.88742	3.56732	0.610245	1.89342	-0.326918	0.972593	-1.38957	0.494368	-2.24594	0.249178
377.84	23.4821	24.4414	16.6369	17.7204	12.1153	11.1646	8.06561	6.49549	3.87406	3.55104	0.590172	1.88414	-0.31411	0.967665	-1.37363	0.491811	-2.23158	0.247876
378.84	23.4113	24.3709	16.5865	17.6643	12.048	11.1246	8.06233	6.46882	3.83856	3.53495	0.609353	1.87497	-0.308447	0.962796	-1.40709	0.489287	-2.23261	0.246589
379.84	23.3677	24.3009	16.5045	17.6086	12.0435	11.0851	8.02276	6.44245	3.8417	3.51904	0.633267	1.86591	-0.305153	0.957988	-1.46272	0.486793	-2.18659	0.245319
380.84	23.198	24.2316	16.4257	17.5535	11.8936	11.0459	7.98261	6.41636	3.85981	3.50332	0.558755	1.85696	-0.340094	0.953239	-1.41523	0.484331	-2.27715	0.244065

## Sheet: Figure 2e
Membrane potential (mV)	before PfRh5			After PfRh5				BK
-80							-0.008	0.006
-70							-0.003	0.008
-60							-0.004	0.004
-50	-0.005	0.006		0.002	0.002		-0.003	0.006
-40	-0.007	0.01		0.003	0.002		0.006	0.005
-30	-0.012	0.01		0.006	0.002		0.003	0.009
-20	-0.005	0.004		0.006	0.003		0.013	0.012
-10	-0.003	0.01		0.009	0.002		0.031	0.027
0	0.004	0.007		0.009	0.003		0.082	0.039
10	0.01	0.004		0.017	0.003		0.124	0.052
20	0.008	0.008		0.025	0.005		0.221	0.071
30	0.016	0.014		0.033	0.008		0.324	0.074
40	0.044	0.022		0.058	0.013		0.441	0.071
50	0.07	0.032		0.089	0.018		0.548	0.07
60	0.133	0.037		0.128	0.022		0.651	0.052
70	0.186	0.048		0.185	0.025		0.759	0.044
80	0.251	0.046		0.238	0.032		0.839	0.03
90	0.293	0.058		0.31	0.033		0.927	0.019
100	0.364	0.059		0.376	0.03		1.001	0
110	0.439	0.053		0.457	0.029
120	0.512	0.056		0.529	0.024
130	0.581	0.052		0.615	0.022
140	0.652	0.044		0.674	0.018
150	0.719	0.041		0.739	0.018
160	0.796	0.038		0.803	0.012
170	0.844	0.029		0.857	0.01
180	0.89	0.023		0.9	0.01
190	0.938	0.023		0.957	0.006
200	1.001	0.001		1.003	0.001

## Sheet: Figure 2f
			Percentage activity
caloxin/PfRH5(uM)			PMCA+PfRH5			PMCA+caloxin
0		100	100	100	100	100	100
0.05		99.2	98.3	99.4	99.7	99.1	98.2
0.1		98	97	98.4	99.8	99.1	99.3
0.25		99	95	98	97.5	96	98
0.5		99	98.9	97.3	90	91	93
1		98	99	96	86	88	90
2		97	99	97.3	78	71	77
4		99	98	99	71	68	72
8		96.7	95.4	97	64	61	66
16		97	98	100	48	51	58
32					45	43	49
