# Supplementary material for: Erythrocyte invasion-neutralising antibodies prevent Plasmodium falciparum RH5 from binding to basigin-containing membrane protein complexes
Source: eLife. 2023 Oct 5;12:e83681. doi: 10.7554/eLife.83681 (PMC10569788; doi:10.7554/eLife.83681)
Supplement: Figure 3—source data 1. [file elife-83681-fig3-data1.xlsx]

## Sheet: Figure 3b
Time (sec)	PMCA+MCT+	PMCA-MCT1+	PMCA-MCT1-
-58.2599	0.048701	-2.59614	-0.35283
-57.2599	0.042982	-2.53057	-0.33287
-56.2599	0.07549	-2.46731	-0.32571
-55.2599	0.05783	-2.40023	-0.29548
-54.2599	0.027599	-2.34934	-0.28858
-53.2599	0.02815	-2.26415	-0.27859
-52.2599	0.044221	-2.21068	-0.27356
-51.2599	0.033588	-2.15499	-0.28878
-50.2599	0.03363	-2.11275	-0.29048
-49.2599	0.048047	-2.07097	-0.29851
-48.2599	0.085907	-2.0216	-0.27795
-47.2599	0.083589	-1.97435	-0.27851
-46.2599	0.047346	-1.9168	-0.26654
-45.2599	0.033991	-1.84608	-0.25746
-44.2599	0.016303	-1.76038	-0.22375
-43.2599	0.00107	-1.69396	-0.19823
-42.2599	0.00696	-1.61906	-0.17794
-41.2599	0.034094	-1.55927	-0.16111
-40.2599	0.04419	-1.50657	-0.15714
-39.2599	0.037617	-1.44933	-0.1508
-38.2599	0.014002	-1.39956	-0.14706
-37.2599	0.030603	-1.35298	-0.14619
-36.2599	0.044629	-1.28632	-0.14739
-35.2599	0.04773	-1.2256	-0.1521
-34.2599	0.068683	-1.17006	-0.14846
-33.2599	0.082471	-1.13399	-0.16542
-32.2599	0.09914	-1.0787	-0.17783
-31.2599	0.104603	-1.04231	-0.18588
-30.2599	0.090675	-0.99132	-0.18805
-29.2599	0.065211	-0.9388	-0.18525
-28.2599	0.065492	-0.89651	-0.16719
-27.2599	0.056056	-0.85106	-0.15522
-26.2599	0.058222	-0.80734	-0.13878
-25.2599	0.054908	-0.74446	-0.11686
-24.2599	0.047987	-0.68917	-0.11105
-23.2599	0.054169	-0.64489	-0.10323
-22.2599	0.054652	-0.60397	-0.08326
-21.2599	0.051966	-0.54994	-0.07938
-20.2599	0.050441	-0.51266	-0.09861
-19.2599	0.050068	-0.46278	-0.09719
-18.2599	0.064942	-0.41501	-0.1067
-17.2599	0.091444	-0.35408	-0.08867
-16.2599	0.081092	-0.29721	-0.0897
-15.2599	0.073212	-0.23955	-0.05848
-14.2599	0.064295	-0.18626	-0.03019
-13.2599	0.0524	-0.13085	-0.03507
-12.2599	0.037953	-0.09231	-0.01326
-11.2599	0.032283	-0.04528	-0.02013
-10.2599	0.014082	-0.000539	-0.02311
-9.25995	0.013575	0.038646	-0.0149
-8.25995	0.011659	0.085704	-0.00206
-7.25995	-0.00528	0.141795	-0.00287
-6.25995	-0.00746	0.195774	0.017873
-5.25995	-0.00492	0.231859	0.034292
-4.25995	0.01371	0.25681	0.035754
-3.25995	0.027033	0.313559	0.056761
-2.25995	0.012304	0.347056	0.075999
-1.25995	-0.0092	0.374045	0.027018
-0.25995	0.272738	0.187694	0.58657
0.740051	24.8748	26.479	-6.34332
1.74005	0.92882	1.80144	7.1951
2.74005	5.27982	7.66096	0.538241
3.74005	6.26355	9.90116	1.26868
4.74005	7.47815	12.11	1.781
5.74005	8.68854	14.126	2.25721
6.74005	9.768	15.9602	2.66635
7.74005	10.798	17.5927	2.95205
8.74005	11.6948	19.0889	3.20982
9.74005	12.491	20.4174	3.4478
10.7401	13.24	21.6285	3.62915
11.7401	14.0034	22.7414	3.79451
12.7401	14.6452	23.741	3.96782
13.7401	15.2231	24.7112	4.09923
14.7401	15.8024	25.6428	4.21552
15.7401	16.3307	26.4997	4.32047
16.7401	16.8533	27.319	4.43124
17.7401	17.3106	28.1101	4.55125
18.7401	17.7219	28.8397	4.63129
19.7401	18.1598	29.5364	4.7182
20.7401	18.5871	30.2327	4.80804
21.7401	18.9504	30.962	4.9115
22.7401	19.3562	31.5501	4.99027
23.7401	19.7361	32.1482	5.05288
24.7401	20.0799	32.6769	5.10934
25.7401	20.407	33.2168	5.15408
26.7401	20.7278	33.7907	5.21443
27.7401	21.0913	34.3461	5.26788
28.7401	21.4021	34.8593	5.30447
29.7401	21.6851	35.3856	5.35593
30.7401	21.982	35.8237	5.38528
31.7401	22.3144	36.3055	5.43677
32.7401	22.6134	36.7564	5.49401
33.7401	22.9044	37.1801	5.55189
34.7401	23.1723	37.5882	5.60337
35.7401	23.4391	37.9946	5.65221
36.7401	23.6692	38.4355	5.68474
37.7401	23.8909	38.8633	5.72979
38.7401	24.1136	39.2598	5.76054
39.7401	24.3228	39.6412	5.7683
40.7401	24.5428	40.0016	5.81287
41.7401	24.7624	40.3613	5.84031
42.7401	24.9818	40.7085	5.8548
43.7401	25.1901	41.0463	5.8736
44.7401	25.3827	41.3926	5.92065
45.7401	25.5988	41.7441	5.97107
46.7401	25.7651	42.0623	5.99432
47.7401	25.961	42.3568	6.03319
48.7401	26.1376	42.6551	6.09059
49.7401	26.328	42.9631	6.13495
50.7401	26.4979	43.284	6.17773
51.7401	26.6748	43.548	6.22321
52.7401	26.8196	43.8176	6.24447
53.7401	26.9771	44.1141	6.25547
54.7401	27.1089	44.384	6.27601
55.7401	27.2582	44.6605	6.31473
56.7401	27.3922	44.9375	6.35229
57.7401	27.5358	45.201	6.38179
58.7401	27.6601	45.4948	6.42424
59.7401	27.8169	45.7816	6.47371
60.7401	27.9485	46.0368	6.5025
61.7401	28.1065	46.2592	6.53162
62.7401	28.2386	46.4712	6.55133
63.7401	28.3764	46.6711	6.58752
64.7401	28.5072	46.8856	6.61687
65.7401	28.642	47.1198	6.64149
66.7401	28.7559	47.3455	6.65626
67.7401	28.8787	47.5602	6.6656
68.7401	28.9986	47.7663	6.69108
69.7401	29.1204	47.9651	6.71917
70.7401	29.2296	48.1854	6.73474
71.7401	29.3449	48.4245	6.78361
72.7401	29.4486	48.6222	6.80868
73.7401	29.5645	48.8068	6.83431
74.7401	29.657	49.0092	6.8632
75.7401	29.7647	49.2294	6.88248
76.7401	29.8653	49.4145	6.90371
77.7401	29.9638	49.6045	6.92445
78.7401	30.0484	49.7868	6.96173
79.7401	30.1581	49.9743	6.97479
80.7401	30.2851	50.1304	7.00939
81.7401	30.3956	50.308	7.03123
82.7401	30.4846	50.4911	7.03384
83.7401	30.5686	50.6854	7.05151
84.7401	30.6579	50.8634	7.07854
85.7401	30.7353	51.0489	7.11313
86.7401	30.816	51.233	7.1557
87.7401	30.8704	51.4012	7.18552
88.7401	30.9514	51.5732	7.22037
89.7401	31.026	51.7238	7.22978
90.7401	31.1145	51.8764	7.25394
91.7401	31.2024	52.0152	7.27157
92.7401	31.3042	52.1614	7.29325
93.7401	31.3864	52.3078	7.30343
94.7401	31.4719	52.4333	7.30964
95.7401	31.5432	52.5761	7.34277
96.7401	31.6068	52.7226	7.36844
97.7401	31.6942	52.8666	7.37714
98.7401	31.7791	53.0078	7.40068
99.7401	31.8631	53.1354	7.42377
100.74	31.9445	53.2789	7.42094
101.74	32.0496	53.417	7.44491
102.74	32.1315	53.5504	7.46147
103.74	32.2016	53.6702	7.49894
104.74	32.2729	53.7896	7.51044
105.74	32.3621	53.918	7.52219
106.74	32.4143	54.059	7.52222
107.74	32.4834	54.1912	7.5306
108.74	32.5265	54.307	7.53552
109.74	32.593	54.4304	7.55341
110.74	32.6723	54.5728	7.5684
111.74	32.7264	54.6985	7.60165
112.74	32.8112	54.8279	7.61985
113.74	32.8902	54.9424	7.63543
114.74	32.9528	55.0484	7.64755
115.74	33.0131	55.1743	7.65468
116.74	33.0963	55.29	7.66113
117.74	33.1617	55.3983	7.69365
118.74	33.2113	55.5082	7.71492
119.74	33.2805	55.6293	7.71279
120.74	33.3298	55.7255	7.74128
121.74	33.398	55.8238	7.7491
122.74	33.4212	55.9274	7.74628
123.74	33.4781	56.03	7.76405
124.74	33.5575	56.1436	7.78983
125.74	33.6114	56.2464	7.79784
126.74	33.6694	56.3516	7.81483
127.74	33.723	56.4706	7.84094
128.74	33.7766	56.5761	7.84843
129.74	33.8005	56.6748	7.86069
130.74	33.8315	56.7567	7.87931
131.74	33.8627	56.8291	7.89281
132.74	33.8993	56.9183	7.91876
133.74	33.9235	57.014	7.96674
134.74	33.9806	57.1199	7.96909
135.74	34.0565	57.2334	7.97627
136.74	34.117	57.3236	7.98097
137.74	34.182	57.4203	7.99918
138.74	34.2305	57.5231	8.01906
139.74	34.2692	57.6195	8.03689
140.74	34.3123	57.7297	8.0489
141.74	34.3398	57.8302	8.04043
142.74	34.3776	57.9285	8.04766
143.74	34.4002	58.0207	8.0466
144.74	34.446	58.0951	8.05209
145.74	34.4896	58.1829	8.07627
146.74	34.549	58.2646	8.08334
147.74	34.5875	58.3533	8.10846
148.74	34.6216	58.4423	8.11671
149.74	34.6593	58.5205	8.12957
150.74	34.7064	58.6006	8.14404
151.74	34.7578	58.6855	8.15668
152.74	34.7786	58.7708	8.17411
153.74	34.8265	58.8456	8.19257
154.74	34.8489	58.9356	8.21191
155.74	34.8691	59.016	8.25079
156.74	34.9158	59.1015	8.2664
157.74	34.9504	59.1952	8.26699
158.74	34.9968	59.2949	8.28403
159.74	35.0254	59.3783	8.30286
160.74	35.0861	59.4684	8.30678
161.74	35.1363	59.568	8.30472
162.74	35.1606	59.6794	8.33052
163.74	35.208	59.767	8.3637
164.74	35.2585	59.8134	8.39457
165.74	35.2887	59.8732	8.40404
166.74	35.3078	59.9574	8.42321
167.74	35.3411	60.0209	8.43043
168.74	35.3998	60.0773	8.43816
169.74	35.4709	60.1076	8.43711
170.74	35.541	60.1692	8.45846
171.74	35.5955	60.2743	8.45424
172.74	35.6454	60.4046	8.46195
173.74	35.6573	60.5292	8.46432
174.74	35.6811	60.6228	8.48025
175.74	35.6854	60.6904	8.5216
176.74	35.7227	60.7576	8.54655
177.74	35.7535	60.8056	8.56431
178.74	35.81	60.8621	8.5942
179.74	35.4968	60.3466	7.56322
180.74	17.8263	46.3533	12.9073
181.74	49.0735	69.062	4.30863
182.74	34.4625	58.6972	8.44547
183.74	32.2463	56.5348	7.58824
184.74	31.0715	55.6818	7.38566
185.74	30.1937	54.7319	7.04319
186.74	29.4494	53.8558	6.79087
187.74	28.7866	53.0851	6.55926
188.74	28.1222	52.3941	6.34185
189.74	27.5384	51.6912	6.14551
190.74	26.9683	51.0405	5.95866
191.74	26.4319	50.5122	5.78578
192.74	25.9632	49.9548	5.64214
193.74	25.4545	49.3665	5.51637
194.74	24.996	48.8545	5.39204
195.74	24.5821	48.3454	5.29254
196.74	24.21	47.8444	5.2022
197.74	23.8426	47.3871	5.13608
198.74	23.5131	46.9243	5.06635
199.74	23.1447	46.5189	4.9976
200.74	22.8275	46.1	4.94558
201.74	22.5032	45.677	4.87587
202.74	22.2069	45.2839	4.82056
203.74	21.9472	44.9348	4.75696
204.74	21.6597	44.5818	4.71289
205.74	21.3674	44.2413	4.65643
206.74	21.1197	43.8753	4.59656
207.74	20.9173	43.5404	4.54454
208.74	20.6373	43.2364	4.51554
209.74	20.3597	42.9119	4.50101
210.74	20.1166	42.5853	4.47233
211.74	19.8861	42.3002	4.42892
212.74	19.6492	42.0037	4.41501
213.74	19.4006	41.7279	4.4043
214.74	19.2035	41.4797	4.35032
215.74	19.0091	41.2393	4.30969
216.74	18.8015	40.978	4.27063
217.74	18.5926	40.7081	4.23425
218.74	18.4111	40.4537	4.18659
219.74	18.2249	40.1944	4.14117
220.74	18.0304	39.9538	4.13462
221.74	17.8605	39.7353	4.10654
222.74	17.6738	39.5045	4.09402
223.74	17.5104	39.2743	4.08124
224.74	17.3135	39.0201	4.07603
225.74	17.1432	38.7908	4.04791
226.74	16.9838	38.5875	4.01849
227.74	16.8162	38.4127	3.9866
228.74	16.6709	38.2057	3.9531
229.74	16.5142	37.9675	3.91734
230.74	16.3553	37.7553	3.87723
231.74	16.2048	37.5601	3.84722
232.74	16.0525	37.3939	3.82971
233.74	15.8908	37.2103	3.81477
234.74	15.7434	37.0404	3.78829
235.74	15.6036	36.8634	3.76941
236.74	15.4645	36.6843	3.75896
237.74	15.3417	36.5256	3.74218
238.74	15.2237	36.3606	3.72614
239.74	15.1145	36.1954	3.72882
240.74	14.9951	36.0208	3.7073
241.74	14.8673	35.8416	3.69816
242.74	14.7147	35.681	3.69298
243.74	14.5771	35.5295	3.6775
244.74	14.4636	35.3645	3.67511
245.74	14.3543	35.2077	3.6511
246.74	14.246	35.0532	3.64675
247.74	14.1252	34.892	3.62565
248.74	14.012	34.7274	3.60671
249.74	13.9009	34.568	3.60043
250.74	13.788	34.4102	3.59752
251.74	13.6935	34.2583	3.58773
252.74	13.6036	34.1043	3.57327
253.74	13.4981	33.9575	3.56721
254.74	13.4177	33.827	3.53943
255.74	13.3269	33.6962	3.53707
256.74	13.2154	33.5753	3.53857
257.74	13.115	33.453	3.51874
258.74	13.0045	33.3211	3.48715
259.74	12.9133	33.1968	3.45851
260.74	12.8353	33.0662	3.48505
261.74	12.7252	32.9354	3.47766
262.74	12.6523	32.785	3.46133
263.74	12.566	32.6635	3.45913
264.74	12.468	32.5372	3.48665
265.74	12.392	32.4407	3.47227
266.74	12.2983	32.3336	3.44019
267.74	12.2136	32.2225	3.40759
268.74	12.1154	32.0931	3.39608
269.74	12.0242	31.9673	3.37195
270.74	11.9349	31.8426	3.3556
271.74	11.8341	31.7221	3.34353
272.74	11.7658	31.5912	3.32836
273.74	11.6862	31.4673	3.32063
274.74	11.5965	31.3416	3.30837
275.74	11.522	31.217	3.29966
276.74	11.4351	31.1081	3.30654
277.74	11.3645	31.0048	3.30377
278.74	11.3051	30.8866	3.28859
279.74	11.2338	30.7958	3.26859
280.74	11.1645	30.6937	3.25067
281.74	11.0868	30.6284	3.23692
282.74	11.005	30.545	3.21995
283.74	10.927	30.4562	3.22606
284.74	10.8586	30.3643	3.20939
285.74	10.7777	30.282	3.20159
286.74	10.7242	30.1858	3.18757
287.74	10.6755	30.0803	3.17791
288.74	10.6073	29.9898	3.18897
289.74	10.5468	29.8812	3.17789
290.74	10.5062	29.7765	3.15275
291.74	10.4564	29.6867	3.14954
292.74	10.3923	29.5953	3.12922
293.74	10.3093	29.5284	3.11677
294.74	10.254	29.4441	3.09484
295.74	10.1895	29.3497	3.07727
296.74	10.1411	29.2791	3.06953
297.74	10.0583	29.1985	3.07593
298.74	9.98701	29.1235	3.05055
299.74	9.9082	29.0565	3.06378
300.74	9.84705	28.9764	3.05088
301.74	9.78371	28.8914	3.04562
302.74	9.70922	28.8088	3.02091
303.74	9.66479	28.7257	3.01791
304.74	9.62607	28.6545	3.00936
305.74	9.5658	28.5786	3.00889
306.74	9.50349	28.4894	3.01969
307.74	9.43504	28.4128	3.01998
308.74	9.35796	28.3433	3.02408
309.74	9.31261	28.2782	3.01627
310.74	9.28372	28.2186	2.995
311.74	9.2335	28.1397	2.9973
312.74	9.1782	28.0725	2.98578
313.74	9.14463	27.9891	2.96473
314.74	9.07038	27.9155	2.95465
315.74	9.01419	27.8304	2.94993
316.74	8.95506	27.7635	2.94645
317.74	8.8877	27.6956	2.91738
318.74	8.85424	27.645	2.89854
319.74	8.82004	27.5796	2.90117
320.74	8.80566	27.522	2.89009
321.74	8.75523	27.4292	2.87181
322.74	8.69722	27.3827	2.87875
323.74	8.65217	27.3125	2.87029
324.74	8.58926	27.2492	2.8684
325.74	8.53214	27.1965	2.86348
326.74	8.47635	27.1479	2.85846
327.74	8.42553	27.0868	2.86147
328.74	8.39816	27.0329	2.87482
329.74	8.35695	26.9692	2.88532
330.74	8.32617	26.9142	2.89109
331.74	8.29512	26.8579	2.87969
332.74	8.24723	26.803	2.87487
333.74	8.19852	26.7307	2.86284
334.74	8.16221	26.6942	2.8386
335.74	8.11032	26.6352	2.83737
336.74	8.0568	26.587	2.81687
337.74	8.01606	26.5342	2.80919
338.74	7.96848	26.4873	2.82108
339.74	7.91953	26.4486	2.8272
340.74	7.86707	26.3848	2.82799
341.74	7.83607	26.3325	2.82267
342.74	7.78653	26.2671	2.82883
343.74	7.7515	26.1856	2.83245
344.74	7.69872	26.1286	2.82597
345.74	7.6593	26.071	2.79923
346.74	7.62715	26.0241	2.79182
347.74	7.58789	25.9573	2.80219
348.74	7.56482	25.8984	2.80187
349.74	7.53454	25.8589	2.81165
350.74	7.497	25.8184	2.81057
351.74	7.46372	25.7829	2.81694
352.74	7.44115	25.7205	2.82927
353.74	7.40598	25.66	2.83016
354.74	7.36719	25.6055	2.8267
355.74	7.32539	25.5407	2.79764
356.74	7.27554	25.4737	2.79836
357.74	7.2154	25.4167	2.77994
358.74	7.14969	25.383	2.75679
359.74	7.11456	25.3565	2.7203
360.74	7.07457	25.3129	2.69631
361.74	7.04684	25.2958	2.67194
362.74	7.02397	25.2602	2.64876
363.74	6.99699	25.2231	2.63008
364.74	6.98474	25.1821	2.63649
365.74	6.95189	25.1378	2.62976
366.74	6.91401	25.0782	2.60385
367.74	6.86533	25.0166	2.60687
368.74	6.84253	24.9575	2.60273
369.74	6.81367	24.8978	2.60883
370.74	6.77653	24.8506	2.61213
371.74	6.73718	24.812	2.6205
372.74	6.69766	24.7736	2.62061
373.74	6.66636	24.7421	2.63908
374.74	6.63617	24.7166	2.6312
375.74	6.57927	24.6781	2.62654
376.74	6.56497	24.6453	2.61834
377.74	6.53587	24.585	2.61644
378.74	6.49754	24.5522	2.62721
379.74	6.46719	24.5079	2.62037
380.74	6.43673	24.4781	2.62714
381.74	6.43093	24.4333	2.60858
382.74	6.39622	24.3842	2.5924
383.74	6.34711	24.3317	2.58106
384.74	6.33193	24.288	2.5708
385.74	6.27834	24.2398	2.57307
386.74	6.23688	24.1941	2.58302
387.74	6.20715	24.1573	2.59473
388.74	6.16911	24.1415	2.608
389.74	6.14591	24.1131	2.61045
390.74	6.12668	24.0827	2.60961
391.74	6.10469	24.0368	2.60233
392.74	6.07632	24.0063	2.5975
393.74	6.04567	23.9584	2.5825
394.74	6.02435	23.9076	2.58109
395.74	6.00483	23.8741	2.5842
396.74	5.98364	23.8437	2.59247
397.74	5.96564	23.8211	2.60077
398.74	5.95268	23.7853	2.60852
399.74	5.93369	23.758	2.59766
400.74	5.90287	23.7521	2.57635
401.74	5.85449	23.7346	2.55945
402.74	5.82197	23.702	2.54761
403.74	5.78743	23.6694	2.53734
404.74	5.75687	23.6168	2.54343
405.74	5.74424	23.575	2.54821
406.74	5.70725	23.5277	2.55261
407.74	5.7066	23.4778	2.55077
408.74	5.67474	23.4444	2.55857
409.74	5.63453	23.4014	2.54495
410.74	5.59468	23.3609	2.54146
411.74	5.57529	23.3318	2.52343
412.74	5.55408	23.3002	2.52661
413.74	5.5332	23.2733	2.51898
414.74	5.51243	23.2596	2.5171
415.74	5.49583	23.2137	2.50393
416.74	5.45535	23.1775	2.49756
417.74	5.40531	23.1352	2.508
418.74	5.37641	23.1025	2.51654
419.74	5.35306	23.0499	2.53378
420.74	5.32672	23.0219	2.54431
421.74
422.74
423.74
424.74
425.74
426.74
427.74
428.74
429.74
430.74
431.74
432.74
433.74
434.74
435.74
436.74
437.74
438.74
439.74
440.74
441.74
442.74
443.74
444.74
445.74
446.74
447.74
448.74
449.74
450.74
451.74
452.74
453.74
454.74
455.74
456.74
457.74
458.74
459.74
460.74
461.74
462.74
463.74
464.74
465.74
466.74
467.74
468.74
469.74
470.74
471.74
472.74
473.74
474.74
475.74
476.74
477.74
478.74
479.74
480.74

## Sheet: Figure 3c
						Two state binding model
Time(sec)	1600 nM	Fit	800 nM	Fit	400 nM	Fit	200 nM	Fit	100 nM	Fit	50 nM	Fit	25 nM	Fit
-60.16	0.166993	0	0.503112	0	0.713992	0	0.933903	0	1.05035	0	1.16156	0	1.42279	0
-59.16	0.156911	0	0.477367	0	0.702005	0	0.932951	0	1.00184	0	1.14114	0	1.38562	0
-58.16	0.159034	0	0.483605	0	0.68367	0	0.924979	0	0.993675	0	1.13421	0	1.35858	0
-57.16	0.162819	0	0.479393	0	0.650589	0	0.890922	0	0.998558	0	1.09283	0	1.32343	0
-56.16	0.164406	0	0.476341	0	0.609085	0	0.867118	0	0.999596	0	1.07152	0	1.28967	0
-55.16	0.17234	0	0.503929	0	0.571243	0	0.852348	0	0.985741	0	1.01342	0	1.25452	0
-54.16	0.18506	0	0.501464	0	0.575075	0	0.833804	0	0.974547	0	0.978213	0	1.20166	0
-53.16	0.186903	0	0.511278	0	0.574245	0	0.814126	0	0.942614	0	0.947427	0	1.15845	0
-52.16	0.183253	0	0.509801	0	0.580007	0	0.789993	0	0.93369	0	0.912613	0	1.125	0
-51.16	0.176649	0	0.51494	0	0.585781	0	0.777445	0	0.901232	0	0.874185	0	1.08911	0
-50.16	0.168422	0	0.486913	0	0.578542	0	0.750626	0	0.862645	0	0.846634	0	1.05865	0
-49.16	0.141395	0	0.464989	0	0.553665	0	0.719901	0	0.825035	0	0.818473	0	1.02368	0
-48.16	0.109767	0	0.418126	0	0.511343	0	0.682205	0	0.792333	0	0.784439	0	1.00824	0
-47.16	0.107191	0	0.392626	0	0.48727	0	0.675455	0	0.772448	0	0.758401	0	0.98584	0
-46.16	0.0996957	0	0.412206	0	0.468313	0	0.656876	0	0.725317	0	0.732742	0	0.967102	0
-45.16	0.0788341	0	0.431115	0	0.45729	0	0.623343	0	0.67379	0	0.678946	0	0.928772	0
-44.16	0.0649056	0	0.443517	0	0.451161	0	0.586929	0	0.639196	0	0.636856	0	0.910156	0
-43.16	0.047694	0	0.418432	0	0.411672	0	0.559586	0	0.605993	0	0.59816	0	0.872314	0
-42.16	0.0311043	0	0.352929	0	0.389663	0	0.5277	0	0.576257	0	0.555655	0	0.840271	0
-41.16	0.0530767	0	0.340844	0	0.37361	0	0.496389	0	0.558373	0	0.551809	0	0.82074	0
-40.16	0.0626841	0	0.316283	0	0.360781	0	0.492862	0	0.54779	0	0.546084	0	0.813416	0
-39.16	0.0683359	0	0.289269	0	0.348647	0	0.476919	0	0.526757	0	0.542349	0	0.781311	0
-38.16	0.0638802	0	0.261315	0	0.331557	0	0.454885	0	0.482507	0	0.53832	0	0.773315	0
-37.16	0.081153	0	0.264245	0	0.324843	0	0.455068	0	0.465356	0	0.54363	0	0.745728	0
-36.16	0.0844369	0	0.270055	0	0.310842	0	0.461135	0	0.441137	0	0.534133	0	0.723511	0
-35.16	0.0749766	0	0.258336	0	0.312917	0	0.442703	0	0.419774	0	0.503738	0	0.685791	0
-34.16	0.0644784	0	0.258764	0	0.292592	0	0.435012	0	0.413427	0	0.471633	0	0.659729	0
-33.16	0.0468394	0	0.276342	0	0.276906	0	0.422867	0	0.388585	0	0.453079	0	0.615479	0
-32.16	0.0323862	0	0.268212	0	0.279921	0	0.412893	0	0.363488	0	0.432669	0	0.572327	0
-31.16	0.0201303	0	0.285229	0	0.270546	0	0.411038	0	0.362621	0	0.422756	0	0.531311	0
-30.16	0.0137337	0	0.279174	0	0.275392	0	0.395632	0	0.357604	0	0.406374	0	0.512634	0
-29.16	-0.0129141	0	0.268834	0	0.260915	0	0.384231	0	0.343664	0	0.376785	0	0.47052	0
-28.16	-0.0195547	0	0.25216	0	0.243117	0	0.367849	0	0.337975	0	0.347891	0	0.433655	0
-27.16	0.00118	0	0.226659	0	0.246449	0	0.352553	0	0.324499	0	0.333877	0	0.40686	0
-26.16	0.0187628	0	0.218786	0	0.24413	0	0.345107	0	0.3458	0	0.323073	0	0.400452	0
-25.16	0.0203376	0	0.225024	0	0.218043	0	0.333596	0	0.341662	0	0.315407	0	0.384644	0
-24.16	0.031678	0	0.207092	0	0.226198	0	0.33185	0	0.327087	0	0.307558	0	0.375061	0
-23.16	0.0484871	0	0.215002	0	0.198842	0	0.326369	0	0.304906	0	0.288161	0	0.364319	0
-22.16	0.045057	0	0.220019	0	0.200588	0	0.29844	0	0.269213	0	0.269143	0	0.360168	0
-21.16	0.0321298	0	0.209875	0	0.18987	0	0.291275	0	0.238805	0	0.239944	0	0.332886	0
-20.16	0.0234382	0	0.203674	0	0.20508	0	0.254885	0	0.209472	0	0.219301	0	0.30127	0
-19.16	0.0276988	0	0.211071	0	0.189003	0	0.217007	0	0.174877	0	0.200162	0	0.279114	0
-18.16	0.0132211	0	0.182946	0	0.169753	0	0.188589	0	0.159752	0	0.17272	0	0.225159	0
-17.16	-0.0132803	0	0.158666	0	0.152761	0	0.154922	0	0.14713	0	0.145645	0	0.167847	0
-16.16	-2.34e-05	0	0.131859	0	0.132155	0	0.123343	0	0.135949	0	0.11492	0	0.145935	0
-15.16	-0.00731	0	0.0804312	0	0.0864521	0	0.0918364	0	0.107287	0	0.0754789	0	0.106812	0
-14.16	0.00435	0	0.062365	0	0.0572769	0	0.0820701	0	0.0809197	0	0.0411766	0	0.0834961	0
-13.16	0.0281989	0	0.0521233	0	0.0457167	0	0.0533468	0	0.0800164	0	0.0429098	0	0.0651245	0
-12.16	0.0309091	0	0.0235343	0	0.0398455	0	0.0283351	0	0.0563712	0	0.0145411	0	0.0507202	0
-11.16	0.0146006	0	-0.0105112	0	0.0134541	0	-0.00588	0	0.0208609	0	-0.0155245	0	0.0155029	0
-10.16	0.0121589	0	-0.0359626	0	-0.00254	0	-0.0374368	0	0.00493	0	-0.0259622	0	0.0135498	0
-9.15997	0.00399	0	-0.0267586	0	-0.0215561	0	-0.0544289	0	-0.022303	0	-0.0242776	0	0.00616	0
-8.15997	-0.00591	0	-0.0431036	0	-0.0255481	0	-0.0617291	0	-0.0378546	0	-0.023338	0	0.00146	0
-7.15997	0.0151127	0	-0.0505741	0	0.0115487	0	-0.0661121	0	-0.0272587	0	-0.010387	0	0.00238	0
-6.15997	0.0224981	0	-0.0270758	0	0.0280285	0	-0.0469466	0	-0.0283575	0	0.00707	0	0.00378	0
-5.15997	0.0128548	0	-0.0255501	0	0.0298599	0	-0.0566505	0	-0.0378792	0	-0.0159401	0	-0.0205078	0
-4.15997	-0.0193598	0	-0.0436895	0	0.00761	0	-0.0850569	0	-0.0407599	0	-0.0447126	0	-0.055603	0
-3.15997	-0.0329582	0	-0.0482185	0	0.00366	0	-0.107053	0	-0.0395516	0	-0.0777565	0	-0.0923462	0
-2.15997	-0.0877553	0	-0.0375499	0	-0.0393411	0	-0.152792	0	-0.072462	0	-0.161947	0	-0.139221	0
-1.15997	-0.137303	0	-0.0714983	0	-0.121591	0	-0.245344	0	-0.111293	0	-0.232648	0	-0.230408	0
-0.159973	-5.89304	0	0.0379405	0	2.23534	0	0.788095	0	1.20359	0	-2.85015	0	0.53302	0
0.840027	-3.09288	34.3171	-13.4314	12.6526	-8.68527	8.88109	-6.52406	5.98738	-5.23244	6.00586	-1.06464	5.03136	-5.51312	2.62494
1.84003	33.2866	46.3315	14.5548	20.0909	11.1701	12.6278	6.16639	7.93642	3.53808	6.98124	1.74665	5.51994	0.848816	2.87313
2.84003	48.8163	55.889	25.9528	26.6346	18.6717	16.0987	10.6057	9.78928	6.57083	7.92061	3.55222	5.99354	1.0036	3.11449
3.84003	58.6353	63.5161	35.2375	32.3956	24.4946	19.315	14.6106	11.5509	9.09607	8.82534	5.08949	6.45265	1.94965	3.34922
4.84003	65.5761	69.6262	41.6754	37.4717	28.8768	22.2961	17.8202	13.2259	11.1386	9.69677	6.34246	6.89772	2.68585	3.5775
5.84003	70.8898	74.5438	46.4588	41.9483	32.2685	25.0601	20.4435	14.8188	12.7488	10.5362	7.37578	7.32919	3.36365	3.79953
6.84003	75.1728	78.5234	50.3263	45.9003	35.0485	27.6234	22.5359	16.3337	14.1943	11.3447	8.28332	7.74751	3.92249	4.01547
7.84003	78.646	81.7649	53.4203	49.3931	37.3669	30.0014	24.2093	17.7746	15.3718	12.1237	9.0141	8.15308	4.37518	4.2255
8.84003	81.6692	84.4254	56.0262	52.484	39.2833	32.2083	25.6494	19.1454	16.42	12.8741	9.67951	8.54632	4.76563	4.42979
9.84003	84.2828	86.628	58.3134	55.223	41.0177	34.2571	26.9935	20.4495	17.3327	13.5972	10.3205	8.92761	5.159	4.62851
10.84	86.6057	88.4693	60.3699	57.654	42.5098	36.1599	28.1761	21.6905	18.0668	14.2939	10.8382	9.29734	5.4679	4.82181
11.84	88.6104	90.0254	62.1436	59.8152	43.8126	37.9279	29.2217	22.8715	18.7817	14.9653	11.2514	9.65587	5.77167	5.00984
12.84	90.4424	91.3559	63.6956	61.7402	45.0991	39.5712	30.1478	23.9957	19.5004	15.6122	11.7505	10.0036	6.07892	5.19276
13.84	92.0978	92.5075	65.1708	63.4582	46.1994	41.0994	30.9296	25.0658	20.1225	16.2358	12.1717	10.3407	6.41064	5.37072
14.84	93.5973	93.5171	66.4327	64.9949	47.1924	42.5213	31.6608	26.0848	20.6238	16.8368	12.5081	10.6678	6.63361	5.54384
15.84	94.9249	94.4135	67.6035	66.3727	48.1477	43.845	32.4176	27.0551	21.0881	17.4161	12.836	10.9849	6.79126	5.71228
16.84	96.1521	95.2195	68.7096	67.6113	48.9258	45.0779	33.081	27.9793	21.6202	17.9745	13.1407	11.2926	6.94574	5.87617
17.84	97.2535	95.9528	69.7333	68.7277	49.713	46.227	33.6799	28.8597	22.0704	18.5129	13.3908	11.591	7.10706	6.03562
18.84	98.3833	96.6276	70.7172	69.7371	50.4698	47.2986	34.1943	29.6986	22.5319	19.032	13.7156	11.8805	7.31268	6.19078
19.84	99.3742	97.2548	71.6189	70.6525	51.1551	48.2985	34.8241	30.498	22.8844	19.5325	13.9716	12.1613	7.50714	6.34176
20.84	100.284	97.8432	72.4693	71.4854	51.8293	49.2323	35.3153	31.26	23.2176	20.0152	14.21	12.4338	7.68774	6.48868
21.84	101.185	98.3995	73.2523	72.2459	52.4293	50.105	35.7738	31.9866	23.5409	20.4807	14.444	12.6981	7.8324	6.63166
22.84	101.979	98.9292	73.9566	72.9428	53.0602	50.9211	36.2137	32.6794	23.8414	20.9297	14.6855	12.9546	7.97778	6.77081
23.84	102.738	99.4365	74.6536	73.5837	53.6463	51.685	36.6843	33.3403	24.1903	21.3628	14.905	13.2035	8.08551	6.90623
24.84	103.506	99.9249	75.3932	74.1754	54.1256	52.4006	37.1053	33.9708	24.4977	21.7807	15.1078	13.445	8.21033	7.03805
25.84	104.177	100.397	75.9708	74.7239	54.6946	53.0715	37.5311	34.5725	24.7689	22.1838	15.2767	13.6794	8.30438	7.16634
26.84	104.836	100.855	76.5653	75.2341	55.2085	53.7012	37.8432	35.1469	25.0378	22.5729	15.4729	13.9069	8.39203	7.29123
27.84	105.472	101.3	77.1243	75.7107	55.6251	54.2927	38.1746	35.6954	25.272	22.9483	15.6697	14.1277	8.47626	7.41279
28.84	105.998	101.734	77.6424	76.1577	56.022	54.8489	38.5438	36.2192	25.5302	23.3107	15.8202	14.342	8.56451	7.53114
29.84	106.491	102.158	78.182	76.5783	56.4274	55.3725	38.8753	36.7196	25.7793	23.6605	15.9292	14.5501	8.64606	7.64636
30.84	107.055	102.572	78.6944	76.9758	56.8536	55.8658	39.2173	37.1978	25.9868	23.9982	16.0627	14.7521	8.73657	7.75853
31.84	107.53	102.978	79.1835	77.3527	57.229	56.3313	39.4675	37.655	26.1513	24.3242	16.1868	14.9482	8.81775	7.86775
32.84	107.999	103.376	79.604	77.7113	57.6212	56.7709	39.7139	38.0922	26.3121	24.6391	16.3594	15.1386	8.89746	7.9741
33.84	108.468	103.767	80.0101	78.0537	58.0214	57.1865	40.0589	38.5104	26.5142	24.9432	16.5251	15.3235	8.97601	8.07766
34.84	108.897	104.15	80.4253	78.3816	58.3629	57.5801	40.4044	38.9105	26.7463	25.2369	16.6262	15.503	9.0332	8.17851
35.84	109.359	104.527	80.8366	78.6967	58.714	57.9531	40.6201	39.2936	26.9669	25.5207	16.7468	15.6774	9.09937	8.27672
36.84	109.726	104.897	81.2185	79.0002	59.0267	58.3072	40.8171	39.6604	27.1995	25.7949	16.9036	15.8468	9.17371	8.37238
37.84	110.122	105.26	81.5909	79.2934	59.3177	58.6437	41.0703	40.0118	27.3604	26.0599	17.0193	16.0114	9.24512	8.46555
38.84	110.484	105.618	81.9549	79.5773	59.6287	58.9639	41.3003	40.3486	27.4853	26.316	17.1268	16.1712	9.3028	8.55631
39.84	110.845	105.969	82.282	79.8529	59.9138	59.269	41.518	40.6715	27.6389	26.5636	17.2568	16.3265	9.3764	8.64472
40.84	111.203	106.315	82.5841	80.1209	60.1868	59.5602	41.7323	40.9811	27.8515	26.803	17.4036	16.4774	9.44507	8.73085
41.84	111.482	106.655	82.895	80.382	60.485	59.8384	41.9794	41.2782	28.0444	27.0345	17.5123	16.624	9.51196	8.81476
42.84	111.836	106.99	83.1989	80.6369	60.7497	60.1046	42.1984	41.5634	28.2278	27.2583	17.5839	16.7665	9.59027	8.89652
43.84	112.128	107.319	83.495	80.8862	61.0071	60.3597	42.3853	41.8374	28.3724	27.4749	17.6915	16.905	9.66956	8.97619
44.84	112.388	107.643	83.7947	81.1302	61.2562	60.6044	42.5923	42.1005	28.5251	27.6844	17.832	17.0397	9.76099	9.05383
45.84	112.655	107.962	84.042	81.3694	61.4989	60.8395	42.7746	42.3535	28.6654	27.8872	17.9197	17.1706	9.81927	9.12949
46.84	112.949	108.276	84.3181	81.6042	61.7104	61.0657	42.9745	42.5968	28.8237	28.0835	18.0155	17.2978	9.85663	9.20323
47.84	113.208	108.584	84.6435	81.8349	61.964	61.2836	43.1854	42.8309	28.9695	28.2735	18.0858	17.4215	9.89404	9.27511
48.84	113.449	108.888	84.8758	82.0618	62.21	61.4939	43.379	43.0562	29.109	28.4575	18.1551	17.5419	9.9566	9.34518
49.84	113.635	109.187	85.0891	82.2852	62.3918	61.697	43.5337	43.2732	29.2147	28.6357	18.2175	17.6589	10.0079	9.41348
50.84	113.822	109.481	85.2692	82.5052	62.5577	61.8934	43.6697	43.4824	29.3231	28.8083	18.3032	17.7727	10.0422	9.48008
51.84	114.046	109.771	85.4737	82.7221	62.7665	62.0837	43.8278	43.684	29.4172	28.9755	18.3916	17.8835	10.0807	9.54501
52.84	114.252	110.055	85.6999	82.936	62.9822	62.2681	44.0104	43.8785	29.5313	29.1376	18.4832	17.9912	10.1451	9.60833
53.84	114.498	110.336	85.9219	83.1471	63.1634	62.4473	44.1719	44.0663	29.6521	29.2947	18.5652	18.096	10.1875	9.67008
54.84	114.735	110.612	86.1455	83.3556	63.3538	62.6214	44.3183	44.2476	29.7699	29.447	18.6348	18.1981	10.2253	9.7303
55.84	114.933	110.883	86.3547	83.5615	63.5416	62.7908	44.4783	44.4228	29.8938	29.5947	18.713	18.2974	10.2742	9.78904
56.84	115.115	111.151	86.5794	83.765	63.7045	62.9559	44.662	44.5921	30.0066	29.738	18.7895	18.394	10.2963	9.84634
57.84	115.273	111.414	86.8227	83.9661	63.8663	63.1169	44.8171	44.756	30.1235	29.877	18.8456	18.4881	10.3212	9.90224
58.84	115.457	111.673	86.9922	84.165	63.9788	63.2741	44.925	44.9146	30.2177	30.0119	18.8887	18.5798	10.3495	9.95678
59.84	115.602	111.927	87.1227	84.3617	64.1249	63.4277	45.0588	45.0682	30.3298	30.1429	18.9564	18.669	10.3884	10.01
60.84	115.735	112.178	87.2985	84.5563	64.2727	63.578	45.1737	45.217	30.419	30.27	19.0175	18.7559	10.4272	10.0619
61.84	115.939	112.425	87.4727	84.7489	64.4267	63.7252	45.3028	45.3613	30.4946	30.3935	19.0769	18.8406	10.4595	10.1126
62.84	116.105	112.668	87.6642	84.9395	64.5894	63.8694	45.4178	45.5013	30.5873	30.5135	19.1607	18.9231	10.5067	10.1621
63.84	116.254	112.907	87.8552	85.1281	64.7422	64.0109	45.5529	45.6373	30.6964	30.6301	19.2304	19.0034	10.5538	10.2104
64.84	116.398	113.142	88.0509	85.3148	64.9012	64.1498	45.6893	45.7693	30.8099	30.7435	19.3107	19.0818	10.5954	10.2575
65.84	116.547	113.374	88.1798	85.4997	65.0328	64.2863	45.8096	45.8976	30.8886	30.8536	19.3707	19.1581	10.6502	10.3036
66.84	116.686	113.601	88.2943	85.6828	65.1675	64.4205	45.9065	46.0224	30.9916	30.9608	19.4286	19.2325	10.7184	10.3485
67.84	116.812	113.826	88.4201	85.8642	65.3164	64.5525	46.0146	46.1438	31.0493	31.0651	19.4451	19.3051	10.7711	10.3924
68.84	116.915	114.047	88.5617	86.0437	65.4223	64.6825	46.1328	46.2621	31.1146	31.1665	19.4481	19.3759	10.78	10.4353
69.84	117.018	114.264	88.6844	86.2216	65.5144	64.8105	46.2229	46.3773	31.1893	31.2653	19.5034	19.4449	10.7892	10.4772
70.84	117.113	114.478	88.7956	86.3978	65.629	64.9367	46.3244	46.4896	31.2669	31.3614	19.5596	19.5122	10.8209	10.5181
71.84	117.262	114.688	88.9222	86.5724	65.7617	65.0612	46.4206	46.5992	31.3419	31.4551	19.622	19.5779	10.8362	10.5581
72.84	117.402	114.895	89.0558	86.7453	65.8949	65.1841	46.5192	46.7061	31.4338	31.5463	19.6992	19.642	10.8751	10.5971
73.84	117.518	115.099	89.17	86.9166	65.9999	65.3054	46.6182	46.8105	31.4881	31.6353	19.7304	19.7046	10.905	10.6353
74.84	117.649	115.299	89.2778	87.0863	66.0898	65.4252	46.6935	46.9125	31.5315	31.722	19.782	19.7657	10.9092	10.6726
75.84	117.745	115.497	89.391	87.2545	66.185	65.5436	46.7719	47.0122	31.586	31.8065	19.8566	19.8253	10.9106	10.7091
76.84	117.808	115.691	89.5197	87.4211	66.2707	65.6607	46.8475	47.1098	31.6466	31.889	19.9017	19.8836	10.9285	10.7448
77.84	117.897	115.882	89.6114	87.5862	66.3458	65.7765	46.9461	47.2053	31.7009	31.9694	19.9239	19.9405	10.9538	10.7797
78.84	118.014	116.071	89.7063	87.7498	66.4746	65.891	47.0455	47.2989	31.7662	32.048	19.9631	19.996	10.9933	10.8138
79.84	118.093	116.256	89.8252	87.9119	66.6073	66.0044	47.116	47.3905	31.8418	32.1247	19.9993	20.0503	11.0323	10.8471
80.84	118.2	116.438	89.949	88.0725	66.7574	66.1167	47.1752	47.4803	31.9167	32.1996	20.0593	20.1034	11.0726	10.8797
81.84	118.306	116.618	90.0925	88.2317	66.8785	66.2279	47.2643	47.5685	31.9566	32.2728	20.1097	20.1553	11.1044	10.9117
82.84	118.424	116.794	90.2022	88.3895	66.9532	66.338	47.335	47.655	31.9886	32.3443	20.1505	20.206	11.1083	10.9429
83.84	118.525	116.968	90.2625	88.5458	67.0274	66.4472	47.4051	47.7399	32.0466	32.4143	20.1919	20.2556	11.1143	10.9735
84.84	118.608	117.139	90.3594	88.7007	67.1011	66.5553	47.4614	47.8233	32.1025	32.4827	20.2124	20.3041	11.1126	11.0034
85.84	118.696	117.307	90.4493	88.8542	67.1443	66.6626	47.5208	47.9053	32.1444	32.5496	20.2416	20.3515	11.1115	11.0327
86.84	118.756	117.473	90.5284	89.0063	67.1955	66.7689	47.5845	47.9859	32.1829	32.6151	20.2526	20.3979	11.1409	11.0614
87.84	118.807	117.636	90.6096	89.1571	67.2549	66.8744	47.643	48.0653	32.2146	32.6792	20.2706	20.4434	11.1575	11.0894
88.84	118.852	117.797	90.7035	89.3065	67.323	66.979	47.7186	48.1433	32.2382	32.742	20.31	20.4878	11.1771	11.1169
89.84	118.897	117.954	90.8073	89.4546	67.3866	67.0829	47.7762	48.2202	32.2927	32.8035	20.3521	20.5314	11.1928	11.1439
90.84	118.947	118.11	90.8895	89.6013	67.4756	67.1859	47.8435	48.2959	32.3411	32.8637	20.3992	20.574	11.1904	11.1703
91.84	119.002	118.263	90.9749	89.7467	67.5663	67.2881	47.9121	48.3705	32.4057	32.9228	20.4577	20.6158	11.22	11.1961
92.84	119.051	118.413	91.0437	89.8908	67.637	67.3896	47.9752	48.4441	32.473	32.9807	20.5201	20.6567	11.2352	11.2215
93.84	119.106	118.562	91.1082	90.0337	67.7134	67.4904	48.0274	48.5167	32.5115	33.0376	20.5352	20.6968	11.2056	11.2463
94.84	119.206	118.707	91.1572	90.1752	67.774	67.5904	48.08	48.5883	32.5711	33.0933	20.5782	20.7361	11.226	11.2706
95.84	119.294	118.851	91.2251	90.3155	67.8347	67.6897	48.1346	48.6589	32.6217	33.1481	20.5827	20.7746	11.2408	11.2945
96.84	119.381	118.992	91.2894	90.4545	67.8899	67.7884	48.1828	48.7287	32.6495	33.2018	20.5931	20.8124	11.2377	11.3179
97.84	119.45	119.131	91.3584	90.5923	67.9357	67.8864	48.207	48.7976	32.6811	33.2546	20.5892	20.8494	11.2242	11.3409
98.84	119.527	119.268	91.4184	90.7289	67.9796	67.9837	48.2396	48.8657	32.7102	33.3064	20.5993	20.8858	11.2344	11.3634
99.84	119.602	119.403	91.5001	90.8642	68.0318	68.0804	48.2891	48.933	32.7425	33.3574	20.6222	20.9214	11.244	11.3855
100.84	119.657	119.535	91.5405	90.9983	68.1018	68.1765	48.3251	48.9996	32.7757	33.4075	20.6137	20.9564	11.248	11.4071
101.84	119.714	119.666	91.5782	91.1312	68.1587	68.2719	48.362	49.0654	32.7989	33.4568	20.6358	20.9908	11.2532	11.4284
102.84	119.746	119.794	91.6466	91.263	68.205	68.3667	48.4052	49.1305	32.8227	33.5052	20.6465	21.0245	11.2664	11.4493
103.84	119.808	119.92	91.7192	91.3935	68.264	68.461	48.4525	49.195	32.8547	33.5529	20.6703	21.0576	11.2856	11.4698
104.84	119.836	120.045	91.778	91.5229	68.3238	68.5546	48.5085	49.2588	32.8752	33.5999	20.6884	21.0902	11.28	11.4899
105.84	119.911	120.167	91.8246	91.6511	68.3929	68.6477	48.5574	49.3219	32.9146	33.6461	20.7187	21.1222	11.2992	11.5097
106.84	119.954	120.288	91.85	91.7782	68.4583	68.7401	48.6094	49.3845	32.9584	33.6916	20.74	21.1536	11.3244	11.5291
107.84	119.985	120.406	91.9001	91.9042	68.5292	68.8321	48.6474	49.4465	32.9768	33.7365	20.7581	21.1845	11.3361	11.5482
108.84	120.025	120.523	91.9682	92.029	68.5886	68.9234	48.6944	49.5079	33.0065	33.7807	20.8091	21.2148	11.342	11.5669
109.84	120.087	120.638	92.0341	92.1527	68.6718	69.0142	48.7281	49.5687	33.039	33.8242	20.8548	21.2447	11.3755	11.5853
110.84	120.148	120.751	92.0992	92.2753	68.7334	69.1045	48.7626	49.6291	33.0725	33.8672	20.9005	21.274	11.41	11.6034
111.84	120.189	120.862	92.1574	92.3969	68.7747	69.1943	48.8031	49.6889	33.1039	33.9096	20.9402	21.3029	11.4304	11.6212
112.84	120.238	120.971	92.1983	92.5173	68.8131	69.2835	48.8277	49.7482	33.1291	33.9514	20.9506	21.3314	11.4301	11.6387
113.84	120.285	121.079	92.2358	92.6366	68.835	69.3721	48.8682	49.8071	33.1599	33.9926	20.9384	21.3594	11.4026	11.6559
114.84	120.326	121.185	92.2768	92.7549	68.8819	69.4603	48.9144	49.8655	33.1854	34.0334	20.9354	21.3869	11.395	11.6729
115.84	120.383	121.289	92.3083	92.8722	68.8995	69.548	48.9397	49.9234	33.2216	34.0736	20.9341	21.4141	11.3723	11.6895
116.84	120.419	121.392	92.3607	92.9883	68.9204	69.6351	48.9823	49.981	33.2749	34.1133	20.9594	21.4408	11.3748	11.7059
117.84	120.467	121.493	92.4399	93.1035	68.9675	69.7217	49.0248	50.038	33.3049	34.1525	20.9908	21.4671	11.3798	11.722
118.84	120.483	121.593	92.5062	93.2176	68.9974	69.8079	49.0707	50.0947	33.3123	34.1913	21.0034	21.493	11.3944	11.7379
119.84	120.519	121.691	92.5308	93.3307	69.0185	69.8935	49.1065	50.151	33.3074	34.2296	21.0282	21.5186	11.4044	11.7535
120.84	120.576	121.787	92.5768	93.4428	69.0721	69.9787	49.1496	50.2069	33.3322	34.2675	21.0826	21.5438	11.4355	11.7689
121.84	120.642	121.882	92.6361	93.5539	69.1381	70.0634	49.1781	50.2624	33.3617	34.305	21.1118	21.5687	11.4624	11.7841
122.84	120.687	121.975	92.6918	93.664	69.2031	70.1476	49.2425	50.3176	33.3959	34.342	21.1188	21.5932	11.4901	11.799
123.84	120.728	122.067	92.7356	93.7731	69.2459	70.2313	49.2954	50.3724	33.4436	34.3787	21.1353	21.6173	11.5136	11.8137
124.84	120.757	122.157	92.7861	93.8812	69.3066	70.3145	49.3462	50.4268	33.4782	34.4149	21.1584	21.6412	11.5334	11.8282
125.84	120.771	122.246	92.8169	93.9884	69.3431	70.3973	49.3848	50.4809	33.5187	34.4508	21.1726	21.6647	11.5383	11.8425
126.84	120.794	122.334	92.8484	94.0946	69.3753	70.4796	49.433	50.5347	33.5669	34.4864	21.1838	21.688	11.5505	11.8566
127.84	120.83	122.42	92.8936	94.1999	69.4311	70.5615	49.4598	50.5882	33.5959	34.5216	21.1846	21.7109	11.5489	11.8705
128.84	120.874	122.505	92.932	94.3042	69.4891	70.6428	49.5117	50.6413	33.6133	34.5564	21.2058	21.7335	11.5587	11.8842
129.84	120.902	122.588	92.9717	94.4076	69.5397	70.7238	49.5495	50.6941	33.6394	34.5909	21.2126	21.7559	11.5546	11.8977
130.84	120.917	122.671	93.0019	94.5101	69.5728	70.8043	49.5504	50.7467	33.6538	34.6251	21.2248	21.778	11.5635	11.911
131.84	120.94	122.751	93.0244	94.6116	69.6162	70.8843	49.5761	50.7989	33.6853	34.659	21.2495	21.7998	11.5723	11.9242
132.84	120.925	122.831	93.0563	94.7123	69.648	70.9639	49.5744	50.8509	33.7112	34.6926	21.2502	21.8214	11.5682	11.9371
133.84	120.923	122.909	93.0682	94.812	69.6732	71.043	49.5691	50.9025	33.7365	34.7259	21.2678	21.8427	11.5636	11.9499
134.84	120.949	122.986	93.0902	94.9109	69.7197	71.1217	49.6012	50.9539	33.787	34.7589	21.2791	21.8638	11.5772	11.9626
135.84	120.987	123.062	93.1308	95.0089	69.7446	71.2	49.6287	51.005	33.8573	34.7916	21.3071	21.8847	11.5759	11.975
136.84	121.048	123.137	93.1876	95.106	69.7808	71.2779	49.6729	51.0559	33.9283	34.8241	21.3282	21.9053	11.5939	11.9874
137.84	121.116	123.21	93.2458	95.2022	69.8333	71.3553	49.7325	51.1064	33.9719	34.8563	21.332	21.9257	11.602	11.9995
138.84	121.133	123.283	93.2753	95.2976	69.8902	71.4322	49.7886	51.1568	34	34.8882	21.3249	21.9458	11.6004	12.0116
139.84	121.155	123.354	93.307	95.3921	69.9217	71.5088	49.823	51.2068	34.0181	34.9199	21.3448	21.9658	11.6013	12.0234
140.84	121.164	123.424	93.3263	95.4858	69.9468	71.5849	49.8385	51.2567	34.0321	34.9514	21.3657	21.9855	11.5914	12.0352
141.84	121.154	123.493	93.354	95.5787	69.9668	71.6606	49.8607	51.3063	34.0253	34.9826	21.3745	22.0051	11.5994	12.0468
142.84	121.15	123.561	93.3444	95.6707	69.964	71.7359	49.8765	51.3556	34.0204	35.0136	21.3687	22.0244	11.5858	12.0582
143.84	121.137	123.628	93.3323	95.7619	69.9709	71.8108	49.8844	51.4047	34.0176	35.0444	21.3763	22.0436	11.5905	12.0696
144.84	121.125	123.693	93.318	95.8523	69.975	71.8853	49.8935	51.4536	34.0155	35.075	21.3828	22.0626	11.5881	12.0808
145.84	121.133	123.758	93.3079	95.9419	69.9767	71.9593	49.9062	51.5022	34.0307	35.1053	21.3804	22.0814	11.5919	12.0918
146.84	121.151	123.822	93.3251	96.0306	69.9991	72.033	49.9197	51.5506	34.0415	35.1355	21.402	22.1	11.5789	12.1028
147.84	121.179	123.884	93.3595	96.1186	70.0285	72.1062	49.9244	51.5988	34.0637	35.1654	21.4207	22.1185	11.5914	12.1137
148.84	121.191	123.946	93.4091	96.2058	70.0475	72.179	49.9447	51.6468	34.0991	35.1952	21.4581	22.1368	11.6018	12.1244
149.84	121.201	124.007	93.4493	96.2922	70.0578	72.2515	49.9638	51.6945	34.1258	35.2248	21.4727	22.1549	11.6125	12.135
150.84	121.236	124.066	93.4989	96.3779	70.0933	72.3235	49.974	51.7421	34.1562	35.2541	21.4859	22.1729	11.6327	12.1455
151.84	121.274	124.125	93.52	96.4628	70.1326	72.3952	50.0168	51.7894	34.1801	35.2833	21.4949	22.1907	11.6485	12.1559
152.84	121.319	124.183	93.5506	96.5469	70.1497	72.4664	50.057	51.8365	34.1879	35.3124	21.5137	22.2083	11.6744	12.1662
153.84	121.321	124.24	93.5903	96.6303	70.1709	72.5373	50.0996	51.8834	34.1986	35.3412	21.5439	22.2259	11.6885	12.1764
154.84	121.314	124.296	93.6177	96.7129	70.1847	72.6078	50.1251	51.9302	34.2046	35.3699	21.5565	22.2432	11.6756	12.1865
155.84	121.293	124.351	93.6388	96.7948	70.1992	72.6778	50.1592	51.9767	34.2007	35.3984	21.5554	22.2605	11.6698	12.1965
156.84	121.281	124.405	93.6505	96.8759	70.2133	72.7475	50.1811	52.023	34.2114	35.4268	21.5653	22.2776	11.6852	12.2064
157.84	121.301	124.459	93.6615	96.9564	70.2588	72.8169	50.2078	52.0691	34.2273	35.455	21.5719	22.2945	11.6853	12.2162
158.84	121.311	124.511	93.6798	97.0361	70.3003	72.8858	50.2565	52.115	34.2376	35.483	21.575	22.3114	11.6949	12.226
159.84	121.353	124.563	93.7209	97.1151	70.3311	72.9544	50.2858	52.1607	34.2785	35.5109	21.5879	22.3281	11.7147	12.2356
160.84	121.371	124.614	93.7517	97.1934	70.3822	73.0226	50.3293	52.2062	34.3307	35.5386	21.6152	22.3447	11.7294	12.2451
161.84	121.419	124.664	93.779	97.271	70.427	73.0904	50.3745	52.2516	34.387	35.5662	21.6534	22.3611	11.7518	12.2546
162.84	121.439	124.714	93.8258	97.3479	70.4776	73.1578	50.3979	52.2967	34.4267	35.5937	21.6875	22.3775	11.7741	12.264
163.84	121.446	124.762	93.8556	97.4241	70.4974	73.2249	50.4379	52.3417	34.4723	35.621	21.7059	22.3937	11.7748	12.2733
164.84	121.465	124.81	93.8546	97.4997	70.5073	73.2916	50.4588	52.3864	34.4827	35.6482	21.74	22.4099	11.7831	12.2825
165.84	121.46	124.857	93.8442	97.5746	70.5029	73.3579	50.4598	52.431	34.4867	35.6752	21.7543	22.4259	11.7813	12.2917
166.84	121.464	124.903	93.8475	97.6488	70.5137	73.4239	50.469	52.4754	34.5005	35.7021	21.8013	22.4418	11.7919	12.3008
167.84	121.46	124.949	93.8521	97.7223	70.5144	73.4895	50.4717	52.5197	34.5078	35.7289	21.8246	22.4576	11.7749	12.3098
168.84	121.436	124.994	93.8464	97.7952	70.5188	73.5548	50.472	52.5637	34.5165	35.7556	21.844	22.4733	11.758	12.3187
169.84	121.391	125.038	93.8504	97.8674	70.5224	73.6197	50.4782	52.6076	34.5261	35.7821	21.8362	22.4889	11.7602	12.3276
170.84	121.383	125.081	93.854	97.939	70.5363	73.6842	50.4853	52.6513	34.5302	35.8085	21.8439	22.5044	11.7527	12.3364
171.84	121.357	125.124	93.8498	98.0099	70.5623	73.7484	50.4969	52.6948	34.5477	35.8348	21.8445	22.5198	11.733	12.3451
172.84	121.353	125.166	93.8463	98.0802	70.5562	73.8122	50.5428	52.7381	34.5599	35.861	21.8537	22.5351	11.745	12.3538
173.84	121.371	125.207	93.8369	98.1499	70.5652	73.8757	50.5909	52.7813	34.5694	35.8871	21.8734	22.5504	11.7592	12.3624
174.84	121.347	125.248	93.8606	98.219	70.5735	73.9389	50.6058	52.8243	34.5816	35.913	21.8675	22.5655	11.7555	12.371
175.84	121.352	125.288	93.8556	98.2874	70.5846	74.0017	50.6219	52.8671	34.6013	35.9388	21.8819	22.5805	11.7524	12.3794
176.84	121.343	125.328	93.8758	98.3553	70.604	74.0641	50.6434	52.9098	34.6292	35.9646	21.9142	22.5955	11.7795	12.3879
177.84	121.335	125.367	93.9064	98.4225	70.6508	74.1262	50.6686	52.9523	34.6775	35.9902	21.9521	22.6104	11.8071	12.3962
178.84	121.326	125.405	93.9475	98.4891	70.7212	74.188	50.6946	52.9946	34.6971	36.0157	22.0371	22.6252	11.8641	12.4045
179.84	132.014	125.442	93.6858	98.5552	73.9249	74.2494	50.4623	53.0368	36.4717	36.0411	22.9347	22.6399	11.3949	12.4128
180.84	105.894	102.338	95.6895	87.5116	66.254	67.2534	50.406	47.6363	31.7038	30.309	19.6024	17.717	11.3777	9.85623
181.84	114.071	100.652	88.3853	85.9798	68.4491	65.9887	49.4463	46.6813	32.995	29.6763	20.3951	17.3382	11.3203	9.64231
182.84	108.73	99.0067	86.8454	84.4853	64.8704	64.7551	46.8773	45.7499	31.3606	29.0593	19.7758	16.9688	10.819	9.43373
183.84	105.059	97.4015	83.8768	83.0274	62.6601	63.5519	45.3097	44.8416	30.3674	28.4576	19.0832	16.6087	10.6681	9.23036
184.84	101.853	95.8352	81.0826	81.605	60.5411	62.3783	43.6174	43.9558	29.2486	27.8709	18.2748	16.2575	10.1808	9.03206
185.84	98.9551	94.3067	78.6237	80.2172	58.5736	61.2335	42.1052	43.0919	28.1511	27.2988	17.483	15.9151	9.69653	8.83871
186.84	96.3581	92.8151	76.3784	78.8632	56.8651	60.1168	40.7591	42.2493	27.2066	26.7408	16.7893	15.5812	9.22882	8.65019
187.84	93.9825	91.3594	74.3977	77.5421	55.2872	59.0275	39.5441	41.4276	26.2823	26.1968	16.1946	15.2556	8.85034	8.46636
188.84	91.855	89.9388	72.5299	76.2531	53.8722	57.9648	38.4217	40.6262	25.5084	25.6662	15.6267	14.9382	8.41656	8.28711
189.84	89.925	88.5524	70.9437	74.9953	52.651	56.9283	37.4714	39.8446	24.8667	25.1488	15.126	14.6286	8.04279	8.11234
190.84	88.1268	87.1992	69.4026	73.7681	51.4729	55.9171	36.5877	39.0823	24.2436	24.6443	14.708	14.3267	7.76166	7.94191
191.84	86.4518	85.8786	68.0005	72.5705	50.3728	54.9306	35.7595	38.3387	23.6375	24.1522	14.2928	14.0323	7.49207	7.77573
192.84	84.8796	84.5896	66.6947	71.402	49.4265	53.9682	35.0142	37.6135	23.1069	23.6723	13.8948	13.7452	7.25891	7.61368
193.84	83.4224	83.3314	65.4444	70.2616	48.4723	53.0293	34.303	36.9062	22.6306	23.2043	13.5544	13.4653	7.03247	7.45566
194.84	81.9864	82.1034	64.4104	69.1488	47.6097	52.1134	33.5992	36.2162	22.1782	22.7479	13.2392	13.1923	6.82214	7.30158
195.84	80.6676	80.9046	63.3628	68.0629	46.7852	51.2197	33.015	35.5433	21.7226	22.3028	12.8988	12.9261	6.60358	7.15132
196.84	79.4106	79.7345	62.3658	67.0031	46.0031	50.3479	32.4401	34.8869	21.3224	21.8687	12.615	12.6665	6.4024	7.0048
197.84	78.2554	78.5921	61.3838	65.9687	45.2636	49.4972	31.9004	34.2466	20.9521	21.4453	12.3799	12.4133	6.22351	6.86192
198.84	77.1272	77.477	60.4938	64.9593	44.5745	48.6673	31.3575	33.622	20.5509	21.0323	12.1622	12.1664	6.09271	6.72258
199.84	76.1066	76.3883	59.6391	63.9741	43.8819	47.8574	30.9017	33.0127	20.1791	20.6296	11.9624	11.9256	5.95166	6.5867
200.84	75.0822	75.3255	58.8336	63.0124	43.2795	47.0673	30.4227	32.4184	19.8596	20.2368	11.7255	11.6907	5.80054	6.45419
201.84	74.0953	74.2878	58.0474	62.0738	42.6262	46.2963	29.9717	31.8387	19.5548	19.8536	11.5139	11.4617	5.64423	6.32497
202.84	73.1087	73.2746	57.2139	61.1577	42.1301	45.5439	29.5444	31.2731	19.2471	19.4799	11.3242	11.2383	5.48932	6.19894
203.84	72.2576	72.2853	56.4755	60.2634	41.5629	44.8098	29.1359	30.7214	18.9773	19.1154	11.146	11.0205	5.36823	6.07604
204.84	71.3849	71.3194	55.8154	59.3905	40.9682	44.0934	28.7242	30.1831	18.7101	18.7599	10.9686	10.808	5.26605	5.95618
205.84	70.4739	70.3761	55.1251	58.5383	40.4449	43.3943	28.3162	29.658	18.43	18.4131	10.7972	10.6008	5.15491	5.83929
206.84	69.6554	69.455	54.4397	57.7064	39.9295	42.7121	27.9617	29.1457	18.1506	18.0748	10.6151	10.3987	5.05591	5.72529
207.84	68.8536	68.5556	53.8014	56.8943	39.4324	42.0463	27.6006	28.6459	17.8673	17.7449	10.447	10.2016	4.92352	5.6141
208.84	68.115	67.6771	53.1614	56.1014	38.9873	41.3965	27.2516	28.1583	17.6301	17.423	10.2769	10.0093	4.80359	5.50566
209.84	67.3461	66.8192	52.6233	55.3273	38.5363	40.7624	26.9039	27.6825	17.399	17.109	10.1175	9.82176	4.68445	5.3999
210.84	66.6188	65.9813	52.0546	54.5715	38.0803	40.1434	26.5527	27.2183	17.1826	16.8028	9.99047	9.63883	4.58557	5.29674
211.84	65.8977	65.1629	51.4505	53.8335	37.6492	39.5393	26.2237	26.7654	16.9527	16.504	9.84485	9.4604	4.4776	5.19613
212.84	65.2046	64.3635	50.9195	53.113	37.2097	38.9497	25.9186	26.3234	16.6916	16.2125	9.71563	9.28636	4.36981	5.098
213.84	64.5243	63.5826	50.3713	52.4094	36.8223	38.3741	25.61	25.8922	16.462	15.9281	9.56751	9.11659	4.27179	5.00229
214.84	63.827	62.8198	49.8042	51.7223	36.41	37.8124	25.3113	25.4714	16.2588	15.6507	9.39605	8.95099	4.16882	4.90893
215.84	63.1416	62.0746	49.2703	51.0513	35.9472	37.264	25.0273	25.0608	16.0489	15.3801	9.22173	8.78945	4.04773	4.81787
216.84	62.5404	61.3466	48.7572	50.396	35.5232	36.7286	24.7178	24.6601	15.8265	15.116	9.06128	8.63187	3.94525	4.72904
217.84	62.0013	60.6353	48.2916	49.7561	35.129	36.206	24.4198	24.2691	15.6326	14.8584	8.92285	8.47814	3.84076	4.6424
218.84	61.4261	59.9404	47.7838	49.131	34.7647	35.6959	24.1319	23.8876	15.4683	14.6071	8.79131	8.32818	3.75336	4.55789
219.84	60.8231	59.2613	47.2834	48.5205	34.4221	35.1978	23.868	23.5152	15.2873	14.3619	8.66862	8.18188	3.66913	4.47544
220.84	60.2131	58.5978	46.7973	47.9243	34.0716	34.7115	23.6168	23.1518	15.1077	14.1226	8.56857	8.03915	3.59949	4.39502
221.84	59.6646	57.9494	46.3865	47.3418	33.7496	34.2367	23.3721	22.7971	14.9478	13.8891	8.45209	7.89991	3.55475	4.31657
222.84	59.1056	57.3158	45.9651	46.7728	33.4293	33.7731	23.1205	22.4509	14.7712	13.6613	8.32153	7.76407	3.48444	4.24004
223.84	58.5457	56.6965	45.5741	46.217	33.0874	33.3205	22.8805	22.113	14.5824	13.439	8.17937	7.63153	3.43188	4.16537
224.84	58.0275	56.0912	45.192	45.6739	32.7386	32.8785	22.6163	21.7832	14.4128	13.2221	8.05774	7.50222	3.37958	4.09254
225.84	57.5629	55.4996	44.7056	45.1434	32.4337	32.4469	22.3662	21.4614	14.2585	13.0105	7.95618	7.37605	3.3194	4.02148
226.84	57.0974	54.9213	44.2838	44.6251	32.1404	32.0254	22.1583	21.1471	14.0956	12.8039	7.84042	7.25296	3.22369	3.95215
227.84	56.6072	54.356	43.8869	44.1186	31.8286	31.6138	21.9737	20.8404	13.9252	12.6023	7.73181	7.13284	3.14972	3.88452
228.84	56.0883	53.8034	43.5037	43.6237	31.4848	31.2118	21.7514	20.541	13.7455	12.4056	7.61848	7.01565	3.08319	3.81853
229.84	55.6504	53.2631	43.1183	43.14	31.2129	30.8191	21.499	20.2487	13.5848	12.2136	7.53187	6.90129	3.01044	3.75414
230.84	55.1967	52.7348	42.7535	42.6674	30.9328	30.4357	21.2899	19.9634	13.4149	12.0263	7.41976	6.78969	2.95062	3.69132
231.84	54.6899	52.2183	42.3955	42.2055	30.66	30.0611	21.084	19.6848	13.2638	11.8434	7.31632	6.6808	2.87311	3.63003
232.84	54.2258	51.7132	42.0233	41.7541	30.3816	29.6952	20.8805	19.4128	13.1031	11.6649	7.22623	6.57454	2.79248	3.57022
233.84	53.76	51.2192	41.6831	41.3128	30.0754	29.3378	20.6447	19.1473	12.9622	11.4907	7.13888	6.47084	2.71234	3.51187
234.84	53.33	50.7362	41.3104	40.8815	29.7891	28.9887	20.4337	18.888	12.8118	11.3207	7.05726	6.36964	2.63538	3.45492
235.84	52.9014	50.2637	40.9337	40.4599	29.5307	28.6476	20.2005	18.6348	12.664	11.1547	6.97909	6.27087	2.55847	3.39936
236.84	52.4333	49.8016	40.5748	40.0477	29.2645	28.3143	19.9678	18.3876	12.5144	10.9927	6.88051	6.17448	2.48505	3.34513
237.84	52.0176	49.3495	40.1995	39.6448	29.0003	27.9887	19.7962	18.1462	12.3811	10.8345	6.76939	6.08041	2.42273	3.29222
238.84	51.6033	48.9073	39.877	39.2508	28.7225	27.6706	19.644	17.9105	12.2369	10.6801	6.67304	5.98859	2.37964	3.24058
239.84	51.1833	48.4747	39.5614	38.8656	28.4743	27.3597	19.4805	17.6803	12.1055	10.5294	6.57614	5.89897	2.33984	3.19018
240.84	50.8008	48.0514	39.2339	38.4889	28.2412	27.056	19.2825	17.4554	11.9749	10.3822	6.4657	5.8115	2.2981	3.14099
241.84	50.4299	47.6372	38.8909	38.1205	28.0094	26.7591	19.0685	17.2359	11.8623	10.2386	6.38082	5.72612	2.26563	3.09299
242.84	50.0501	47.2319	38.5562	37.7602	27.7567	26.469	18.8844	17.0214	11.7289	10.0983	6.28043	5.64277	2.22382	3.04614
243.84	49.6685	46.8353	38.2657	37.4079	27.5038	26.1854	18.7104	16.8119	11.5849	9.96134	6.19287	5.56141	2.17993	3.00041
244.84	49.2972	46.4471	37.987	37.0633	27.259	25.9083	18.5275	16.6073	11.4499	9.82761	6.10083	5.48199	2.12622	2.95578
245.84	48.9165	46.0671	37.6853	36.7261	27.041	25.6374	18.3206	16.4074	11.3312	9.69703	6.02185	5.40445	2.07098	2.91221
246.84	48.547	45.6952	37.3669	36.3964	26.8199	25.3726	18.1334	16.2121	11.2189	9.56952	5.94232	5.32875	2.01691	2.86969
247.84	48.1944	45.3311	37.076	36.0737	26.6181	25.1137	17.9546	16.0213	11.1197	9.445	5.85283	5.25485	1.95746	2.82818
248.84	47.8719	44.9746	36.8181	35.7581	26.4246	24.8606	17.797	15.8349	11.0173	9.3234	5.79584	5.1827	1.91174	2.78765
249.84	47.5662	44.6256	36.5927	35.4492	26.2266	24.6131	17.6613	15.6528	10.9297	9.20464	5.73645	5.11225	1.87506	2.74809
250.84	47.1895	44.2838	36.3107	35.147	26.0187	24.3712	17.5096	15.4749	10.82	9.08865	5.66377	5.04346	1.81842	2.70947
251.84	46.8282	43.9491	36.0005	34.8512	25.8091	24.1346	17.3584	15.301	10.7019	8.97537	5.57886	4.97629	1.76703	2.67177
252.84	46.4962	43.6213	35.685	34.5617	25.6047	23.9032	17.2128	15.1311	10.5981	8.86472	5.51251	4.9107	1.72021	2.63495
253.84	46.1462	43.3003	35.3951	34.2784	25.3961	23.677	17.0656	14.9651	10.4879	8.75663	5.45355	4.84665	1.68274	2.59901
254.84	45.8083	42.9858	35.1271	34.0011	25.2172	23.4557	16.9459	14.8028	10.3595	8.65105	5.38568	4.7841	1.64459	2.56392
255.84	45.4692	42.6777	34.8962	33.7296	25.0121	23.2392	16.8048	14.6442	10.271	8.54791	5.30811	4.72302	1.58112	2.52965
256.84	45.1452	42.3758	34.6709	33.4638	24.8107	23.0275	16.6507	14.4892	10.2021	8.44715	5.24242	4.66336	1.53674	2.49619
257.84	44.8663	42.0801	34.4558	33.2035	24.6175	22.8204	16.5058	14.3377	10.1199	8.3487	5.18383	4.60509	1.50708	2.46351
258.84	44.5885	41.7902	34.2244	32.9487	24.4143	22.6178	16.3625	14.1896	10.0426	8.25252	5.1364	4.54817	1.47211	2.4316
259.84	44.3107	41.5062	33.9906	32.6991	24.2345	22.4196	16.2074	14.0448	9.93733	8.15855	5.06387	4.49258	1.41583	2.40044
260.84	44.016	41.2278	33.7241	32.4547	24.0565	22.2256	16.0636	13.9033	9.82931	8.06672	4.99651	4.43828	1.35693	2.37001
261.84	43.7166	40.9549	33.4747	32.2154	23.8652	22.0358	15.942	13.7649	9.72705	7.97698	4.91925	4.38523	1.30273	2.34028
262.84	43.4209	40.6874	33.2199	31.9809	23.6464	21.85	15.8147	13.6295	9.62576	7.88929	4.84246	4.3334	1.24695	2.31125
263.84	43.1342	40.4251	32.9691	31.7512	23.4535	21.6682	15.6698	13.4972	9.53451	7.8036	4.7965	4.28277	1.1991	2.28289
264.84	42.8728	40.1679	32.729	31.5261	23.2927	21.4903	15.563	13.3678	9.45411	7.71984	4.74862	4.2333	1.15027	2.25519
265.84	42.5857	39.9157	32.5189	31.3056	23.1434	21.3162	15.4471	13.2413	9.38291	7.63797	4.69465	4.18497	1.10907	2.22813
266.84	42.3099	39.6684	32.3325	31.0895	23.0193	21.1457	15.3196	13.1175	9.28151	7.55795	4.63766	4.13774	1.078	2.20169
267.84	42.0542	39.4258	32.1358	30.8778	22.8473	20.9787	15.2006	12.9965	9.20341	7.47973	4.59297	4.09159	1.04144	2.17587
268.84	41.8259	39.1878	31.9227	30.6702	22.6888	20.8153	15.0723	12.8781	9.12861	7.40326	4.53707	4.0465	1.01135	2.15064
269.84	41.5958	38.9543	31.7162	30.4668	22.5102	20.6553	14.9498	12.7622	9.03977	7.32851	4.47493	4.00242	0.973694	2.12598
270.84	41.3364	38.7252	31.504	30.2673	22.332	20.4986	14.819	12.6489	8.9425	7.25542	4.40735	3.95935	0.940125	2.10189
271.84	41.071	38.5005	31.3168	30.0718	22.1835	20.3451	14.7093	12.538	8.86306	7.18395	4.35631	3.91725	0.902649	2.07836
272.84	40.8262	38.2798	31.1058	29.8801	22.0374	20.1948	14.591	12.4295	8.80004	7.11407	4.3173	3.87609	0.875671	2.05535
273.84	40.5377	38.0633	30.9239	29.6921	21.8638	20.0476	14.4657	12.3234	8.70452	7.04574	4.25254	3.83587	0.8349	2.03288
274.84	40.2805	37.8508	30.6824	29.5077	21.7122	19.9033	14.341	12.2195	8.61425	6.97891	4.20048	3.79654	0.773254	2.01091
275.84	40.0106	37.6421	30.4798	29.3269	21.5714	19.762	14.2119	12.1178	8.53247	6.91355	4.15009	3.7581	0.750427	1.98943
276.84	39.7746	37.4372	30.2502	29.1495	21.4142	19.6236	14.0749	12.0183	8.47417	6.84963	4.10862	3.72052	0.72522	1.96845
277.84	39.5438	37.236	30.0563	28.9755	21.2747	19.4879	13.9547	11.9209	8.37694	6.7871	4.04447	3.68377	0.683594	1.94793
278.84	39.3004	37.0385	29.8682	28.8047	21.1128	19.3549	13.8289	11.8255	8.2928	6.72593	3.98159	3.64783	0.650085	1.92788
279.84	39.0484	36.8444	29.6726	28.6372	20.9378	19.2246	13.7219	11.7322	8.22814	6.66608	3.93174	3.6127	0.61438	1.90827
280.84	38.8019	36.6537	29.4978	28.4727	20.7945	19.0969	13.6412	11.6408	8.16471	6.60754	3.87318	3.57833	0.582642	1.88911
281.84	38.5817	36.4664	29.288	28.3113	20.6152	18.9717	13.5424	11.5513	8.08527	6.55025	3.80286	3.54472	0.532837	1.87037
282.84	38.3801	36.2824	29.0873	28.1529	20.4773	18.8489	13.4366	11.4636	8.02146	6.4942	3.73158	3.51185	0.494812	1.85204
283.84	38.1628	36.1016	28.9302	27.9974	20.3385	18.7285	13.3368	11.3778	7.96608	6.43934	3.65316	3.4797	0.445801	1.83413
284.84	37.9102	35.9238	28.7126	27.8447	20.2017	18.6105	13.2254	11.2937	7.87407	6.38565	3.56773	3.44825	0.393555	1.8166
285.84	37.6463	35.7491	28.5241	27.6948	20.0579	18.4947	13.1114	11.2114	7.77988	6.33311	3.50386	3.41748	0.356689	1.79947
286.84	37.4184	35.5774	28.3545	27.5475	19.9152	18.3812	13.0041	11.1307	7.67686	6.28167	3.44838	3.38738	0.311096	1.78271
287.84	37.2087	35.4085	28.1674	27.4029	19.7813	18.2698	12.899	11.0517	7.58276	6.23133	3.40894	3.35792	0.279602	1.76631
288.84	37.0095	35.2424	28.0056	27.2608	19.6344	18.1606	12.7913	10.9743	7.48511	6.18204	3.36987	3.3291	0.242065	1.75028
289.84	36.7879	35.0791	27.8256	27.1212	19.4948	18.0534	12.7024	10.8984	7.39415	6.13378	3.33915	3.3009	0.200684	1.73459
290.84	36.5895	34.9185	27.6381	26.9841	19.3533	17.9482	12.5887	10.824	7.32479	6.08652	3.29638	3.2733	0.180542	1.71924
291.84	36.3943	34.7605	27.4672	26.8493	19.206	17.845	12.4895	10.7511	7.26625	6.04025	3.25674	3.24629	0.151794	1.70423
292.84	36.174	34.605	27.2934	26.7169	19.0585	17.7436	12.4	10.6797	7.18935	5.99493	3.18383	3.21984	0.110168	1.68954
293.84	35.9735	34.4521	27.1182	26.5867	18.9153	17.6442	12.2947	10.6097	7.12537	5.95054	3.11481	3.19396	0.0725708	1.67516
294.84	35.7824	34.3015	26.9502	26.4587	18.7749	17.5466	12.1965	10.541	7.0479	5.90707	3.05381	3.16862	0.0391846	1.66109
295.84	35.5808	34.1533	26.7842	26.3329	18.6594	17.4507	12.1213	10.4737	6.99204	5.86448	3.01198	3.14381	0.0123291	1.64732
296.84	35.3805	34.0075	26.6395	26.2091	18.5527	17.3566	12.0366	10.4077	6.9433	5.82275	2.98859	3.11952	-0.0150146	1.63384
297.84	35.2099	33.8639	26.4899	26.0874	18.4502	17.2642	11.9348	10.3429	6.88368	5.78187	2.9504	3.09573	-0.0362549	1.62064
298.84	35.0498	33.7225	26.3623	25.9678	18.3653	17.1734	11.8616	10.2794	6.84021	5.74181	2.94647	3.07244	-0.0598755	1.60773
299.84	34.9015	33.5832	26.225	25.85	18.2907	17.0842	11.7955	10.2171	6.81553	5.70255	2.9344	3.04962	-0.0842896	1.59508
300.84	34.7426	33.4461	26.0978	25.7342	18.1934	16.9966	11.7405	10.156	6.76868	5.66408	2.91553	3.02727	-0.0906982	1.5827
301.84	34.5583	33.311	25.9572	25.6202	18.0883	16.9105	11.678	10.0961	6.71106	5.62636	2.87708	3.00538	-0.123047	1.57058
302.84	34.3513	33.1779	25.813	25.5081	17.9795	16.8259	11.6137	10.0372	6.63707	5.58939	2.83048	2.98393	-0.139709	1.55871
303.84	34.1569	33.0468	25.675	25.3977	17.8657	16.7428	11.5341	9.97951	6.56119	5.55315	2.78755	2.96292	-0.155823	1.54708
304.84	33.9564	32.9175	25.5118	25.289	17.7271	16.6611	11.4469	9.92285	6.46294	5.51761	2.70347	2.94233	-0.182007	1.53569
305.84	33.7731	32.7902	25.3517	25.182	17.5941	16.5807	11.3447	9.86723	6.37042	5.48276	2.65051	2.92215	-0.244446	1.52453
306.84	33.6188	32.6646	25.2169	25.0767	17.5063	16.5018	11.2366	9.81263	6.30237	5.44859	2.60132	2.90238	-0.283508	1.5136
307.84	33.4427	32.5408	25.0774	24.973	17.39	16.4241	11.1551	9.75902	6.22801	5.41507	2.54081	2.883	-0.324341	1.5029
308.84	33.2884	32.4188	24.9306	24.8708	17.2808	16.3477	11.0584	9.70638	6.1536	5.38219	2.48012	2.864	-0.373474	1.4924
309.84	33.1088	32.2984	24.7918	24.7702	17.1532	16.2726	10.9766	9.65468	6.12056	5.34994	2.43923	2.84537	-0.421265	1.48212
310.84	32.9441	32.1797	24.6625	24.671	17.0442	16.1987	10.9072	9.60391	6.07468	5.31829	2.40571	2.82711	-0.458679	1.47205
311.84	32.8154	32.0626	24.5395	24.5734	16.9502	16.126	10.8528	9.55403	6.04066	5.28724	2.3879	2.8092	-0.457764	1.46217
312.84	32.6755	31.947	24.4213	24.4771	16.8551	16.0545	10.7729	9.50503	5.99683	5.25677	2.35974	2.79164	-0.452087	1.45249
313.84	32.5556	31.8331	24.3005	24.3822	16.7891	15.9841	10.6967	9.45689	5.95288	5.22687	2.33759	2.77441	-0.465149	1.443
314.84	32.4277	31.7206	24.1905	24.2887	16.7233	15.9149	10.6222	9.40958	5.9157	5.19751	2.31571	2.75752	-0.472412	1.4337
315.84	32.3145	31.6095	24.0865	24.1965	16.6641	15.8467	10.5491	9.36309	5.86829	5.16869	2.28784	2.74095	-0.489563	1.42457
316.84	32.1872	31.4999	23.977	24.1056	16.581	15.7795	10.4872	9.31739	5.83131	5.1404	2.25118	2.72469	-0.503418	1.41563
317.84	32.0407	31.3917	23.8568	24.016	16.4664	15.7134	10.4154	9.27246	5.76774	5.11262	2.19984	2.70873	-0.545105	1.40685
318.84	31.8802	31.2849	23.7199	23.9275	16.3529	15.6484	10.341	9.22829	5.71394	5.08533	2.15798	2.69307	-0.589233	1.39825
319.84	31.7168	31.1794	23.6006	23.8403	16.2464	15.5843	10.284	9.18486	5.67894	5.05854	2.13761	2.67771	-0.616089	1.38981
320.84	31.5583	31.0752	23.4779	23.7543	16.152	15.5211	10.2284	9.14215	5.62396	5.03222	2.09119	2.66263	-0.651184	1.38153
321.84	31.4245	30.9722	23.3406	23.6694	16.066	15.4589	10.1806	9.10014	5.57822	5.00636	2.06428	2.64782	-0.661072	1.3734
322.84	31.2689	30.8706	23.2168	23.5856	15.9881	15.3976	10.1043	9.05882	5.53112	4.98095	2.02555	2.63328	-0.675903	1.36543
323.84	31.127	30.7701	23.1069	23.5029	15.8971	15.3372	10.043	9.01817	5.49083	4.95599	2.00455	2.61901	-0.688232	1.3576
324.84	30.9736	30.6708	22.9844	23.4213	15.8216	15.2777	9.96878	8.97817	5.4322	4.93145	1.96774	2.605	-0.719299	1.34992
325.84	30.8197	30.5726	22.8766	23.3408	15.7299	15.219	9.89341	8.9388	5.37059	4.90734	1.94547	2.59123	-0.73645	1.34238
326.84	30.6548	30.4756	22.7686	23.2612	15.6422	15.1612	9.83893	8.90006	5.323	4.88363	1.90735	2.57771	-0.729797	1.33498
327.84	30.4885	30.3797	22.6442	23.1826	15.5494	15.1041	9.75869	8.86192	5.24226	4.86033	1.88211	2.56443	-0.751831	1.32771
328.84	30.3417	30.2849	22.5249	23.105	15.4373	15.0479	9.67302	8.82438	5.17495	4.83741	1.84099	2.55138	-0.786072	1.32057
329.84	30.2175	30.1912	22.4073	23.0284	15.3474	14.9924	9.59641	8.78741	5.12847	4.81488	1.81882	2.53855	-0.813049	1.31357
330.84	30.0762	30.0984	22.2951	22.9527	15.2387	14.9377	9.5428	8.75101	5.07688	4.79271	1.78547	2.52595	-0.836853	1.30668
331.84	29.9111	30.0067	22.195	22.8779	15.1373	14.8837	9.45944	8.71516	5.02467	4.77091	1.74142	2.51357	-0.87616	1.29992
332.84	29.7552	29.916	22.0588	22.804	15.036	14.8305	9.37836	8.67984	4.95972	4.74946	1.67407	2.50139	-0.930969	1.29328
333.84	29.627	29.8262	21.9468	22.7309	14.9413	14.7779	9.2978	8.64505	4.9105	4.72835	1.63356	2.48942	-0.97583	1.28675
334.84	29.493	29.7374	21.8357	22.6587	14.8727	14.726	9.22565	8.61077	4.86206	4.70759	1.58392	2.47765	-1.00092	1.28033
335.84	29.3625	29.6495	21.7162	22.5873	14.7942	14.6748	9.1557	8.57699	4.81165	4.68715	1.55151	2.46608	-1.0368	1.27403
336.84	29.2232	29.5624	21.6091	22.5167	14.7335	14.6243	9.08291	8.5437	4.76551	4.66703	1.50375	2.4547	-1.06689	1.26783
337.84	29.08	29.4763	21.5156	22.4469	14.6559	14.5744	9.01228	8.51088	4.74656	4.64722	1.49946	2.4435	-1.09705	1.26174
338.84	28.9547	29.391	21.4138	22.3779	14.5902	14.5251	8.95215	8.47853	4.7345	4.62772	1.49463	2.43248	-1.10541	1.25575
339.84	28.8332	29.3066	21.3475	22.3096	14.5217	14.4764	8.89605	8.44664	4.71352	4.60852	1.47448	2.42165	-1.10071	1.24986
340.84	28.7247	29.223	21.2544	22.242	14.4312	14.4284	8.85254	8.41518	4.68799	4.5896	1.43604	2.41098	-1.11713	1.24407
341.84	28.6009	29.1402	21.145	22.1752	14.3348	14.3809	8.79885	8.38416	4.6432	4.57097	1.40097	2.40049	-1.13257	1.23837
342.84	28.4819	29.0582	21.0336	22.1091	14.2289	14.334	8.72925	8.35356	4.59863	4.55262	1.36249	2.39016	-1.15204	1.23276
343.84	28.3564	28.9769	20.9265	22.0436	14.1274	14.2876	8.66262	8.32337	4.54493	4.53454	1.3193	2.37999	-1.1709	1.22725
344.84	28.2425	28.8964	20.8128	21.9789	14.0534	14.2418	8.60259	8.29359	4.4941	4.51672	1.28264	2.36998	-1.19958	1.22182
345.84	28.1317	28.8166	20.7018	21.9148	13.97	14.1965	8.52722	8.2642	4.45093	4.49916	1.26074	2.36012	-1.20538	1.21648
346.84	28.0308	28.7376	20.6003	21.8513	13.8827	14.1517	8.47776	8.23519	4.41393	4.48185	1.24174	2.35041	-1.22412	1.21123
347.84	27.9199	28.6592	20.4991	21.7884	13.7913	14.1074	8.41721	8.20656	4.38964	4.46479	1.21903	2.34084	-1.24683	1.20605
348.84	27.8265	28.5816	20.408	21.7262	13.719	14.0636	8.36094	8.17829	4.35741	4.44797	1.19852	2.33142	-1.26147	1.20096
349.84	27.697	28.5046	20.3278	21.6646	13.6388	14.0203	8.31687	8.15038	4.32836	4.43138	1.16971	2.32214	-1.26733	1.19594
350.84	27.5745	28.4283	20.2311	21.6035	13.5729	13.9775	8.26749	8.12282	4.31798	4.41502	1.1442	2.31299	-1.28137	1.19101
351.84	27.463	28.3526	20.1564	21.5431	13.5234	13.9352	8.23535	8.0956	4.29443	4.39888	1.11475	2.30398	-1.2724	1.18614
352.84	27.3665	28.2776	20.0899	21.4831	13.4673	13.8932	8.19699	8.06871	4.26619	4.38296	1.08682	2.29509	-1.25989	1.18135
353.84	27.2685	28.2031	20.0114	21.4238	13.4052	13.8518	8.15786	8.04215	4.22993	4.36725	1.06033	2.28634	-1.26654	1.17663
354.84	27.1679	28.1293	19.9128	21.365	13.3545	13.8107	8.12736	8.01591	4.19847	4.35175	1.04618	2.2777	-1.26965	1.17198
355.84	27.04	28.0561	19.836	21.3067	13.3068	13.7701	8.09263	7.98998	4.17137	4.33645	1.01896	2.26919	-1.28369	1.16739
356.84	26.9224	27.9834	19.7344	21.2489	13.2314	13.7299	8.04031	7.96435	4.11671	4.32135	0.982265	2.26079	-1.31885	1.16287
357.84	26.812	27.9114	19.6245	21.1916	13.1807	13.6901	7.97026	7.93902	4.0574	4.30645	0.951588	2.25251	-1.35797	1.15842
358.84	26.6907	27.8398	19.5349	21.1348	13.1164	13.6507	7.92358	7.91398	4.01361	4.29173	0.93744	2.24434	-1.39233	1.15403
359.84	26.5763	27.7688	19.4431	21.0785	13.0263	13.6117	7.87789	7.88922	3.96608	4.2772	0.901576	2.23628	-1.42175	1.1497
360.84	26.468	27.6984	19.3428	21.0226	12.9596	13.573	7.82541	7.86474	3.93419	4.26285	0.896399	2.22832	-1.43317	1.14543
361.84	26.3732	27.6285	19.279	20.9673	12.9107	13.5348	7.80593	7.84052	3.90321	4.24867	0.870325	2.22047	-1.46277	1.14122
362.84	26.2694	27.5591	19.2116	20.9123	12.845	13.4968	7.77205	7.81657	3.88718	4.23466	0.848706	2.21272	-1.48645	1.13707
363.84	26.1774	27.4901	19.147	20.8578	12.7852	13.4593	7.73889	7.79288	3.85815	4.22083	0.837036	2.20508	-1.50757	1.13297
364.84	26.0951	27.4217	19.0786	20.8038	12.7353	13.4221	7.70864	7.76945	3.82838	4.20716	0.82052	2.19752	-1.51459	1.12893
365.84	26.0126	27.3538	19.0158	20.7501	12.6926	13.3852	7.67639	7.74626	3.79431	4.19364	0.800538	2.19007	-1.54138	1.12494
366.84	25.9085	27.2863	18.9499	20.6969	12.6303	13.3486	7.63555	7.72331	3.73312	4.18029	0.777821	2.1827	-1.56458	1.121
367.84	25.7824	27.2193	18.8572	20.6441	12.5624	13.3124	7.58882	7.70059	3.69248	4.16708	0.749037	2.17543	-1.58105	1.11711
368.84	25.6731	27.1527	18.775	20.5917	12.4798	13.2765	7.52774	7.67811	3.63655	4.15403	0.710719	2.16825	-1.6236	1.11327
369.84	25.5516	27.0866	18.6708	20.5397	12.4098	13.2409	7.47327	7.65585	3.59973	4.14112	0.679444	2.16115	-1.66278	1.10948
370.84	25.4263	27.0209	18.5868	20.488	12.349	13.2056	7.41965	7.63381	3.55809	4.12836	0.638893	2.15413	-1.69226	1.10574
371.84	25.3153	26.9557	18.4885	20.4368	12.277	13.1706	7.35925	7.61199	3.49939	4.11573	0.593142	2.1472	-1.73309	1.10204
372.84	25.2238	26.8908	18.3812	20.3858	12.2053	13.1358	7.30552	7.59037	3.45629	4.10325	0.553261	2.14035	-1.77783	1.09839
373.84	25.1386	26.8264	18.2803	20.3353	12.1409	13.1014	7.2656	7.56897	3.41429	4.09089	0.537757	2.13358	-1.79407	1.09479
374.84	25.0762	26.7624	18.2189	20.2851	12.0957	13.0672	7.22095	7.54776	3.35999	4.07867	0.528442	2.12688	-1.79156	1.09122
375.84	24.9804	26.6988	18.1427	20.2353	12.0339	13.0333	7.18142	7.52675	3.30397	4.06657	0.518764	2.12026	-1.79413	1.0877
376.84	24.8786	26.6355	18.0461	20.1857	11.9511	12.9997	7.12476	7.50594	3.26666	4.05459	0.507752	2.11371	-1.79932	1.08422
377.84	24.7755	26.5727	17.9532	20.1366	11.8805	12.9664	7.07446	7.48531	3.24658	4.04274	0.488038	2.10724	-1.80817	1.08078
378.84	24.6758	26.5102	17.885	20.0877	11.8183	12.9333	7.00763	7.46487	3.22864	4.03101	0.476686	2.10083	-1.80658	1.07738
379.84	24.6031	26.448	17.8025	20.0392	11.7794	12.9004	6.96344	7.4446	3.21301	4.01939	0.456665	2.0945	-1.80658	1.07402
380.84	24.5361	26.3863	17.7485	19.9909	11.727	12.8678	6.93368	7.42452	3.22535	4.00789	0.421289	2.08823	-1.80908	1.07069

## Sheet: Figure 3d
volume	UV (MCT1)	UV(MCT1+Rh5)
-0.00717	0	0.438198
-0.006338	1.47076	0.485965
-0.005506	1.47799	0.483437
-0.004675	1.48324	0.482059
-0.003843	1.4868	0.480434
-0.003011	1.49013	0.478653
-0.002179	1.49297	0.476945
-0.001347	1.4948	0.475814
-0.000516	1.49621	0.475207
0.000316	1.49834	0.474662
0.001148	1.50097	0.473851
0.00198	1.50333	0.472998
0.002812	1.50549	0.471862
0.003644	1.50768	0.470426
0.004475	1.50953	0.469441
0.005307	1.5115	0.468185
0.006139	1.51392	0.466716
0.006971	1.51646	0.465595
0.007803	1.51916	0.464895
0.008634	1.52158	0.464383
0.009466	1.52342	0.463869
0.010298	1.52545	0.463325
0.01113	1.52733	0.462047
0.011962	1.5292	0.461405
0.012794	1.53177	0.461303
0.013625	1.53407	0.46071
0.014457	1.53654	0.460025
0.015289	1.53844	0.459462
0.016121	1.53939	0.45987
0.016953	1.5408	0.460207
0.017784	1.54326	0.46054
0.018616	1.54735	0.461394
0.019448	1.55051	0.462444
0.02028	1.55343	0.463615
0.021112	1.55707	0.464794
0.021944	1.56014	0.465533
0.022775	1.56222	0.465269
0.023607	1.56467	0.466065
0.024439	1.56753	0.46745
0.025271	1.56982	0.467305
0.026103	1.57123	0.467676
0.026934	1.57329	0.46895
0.027766	1.57605	0.469811
0.028598	1.57741	0.46995
0.02943	1.57893	0.470425
0.030262	1.58016	0.471093
0.031094	1.58034	0.4724
0.031925	1.58045	0.473808
0.032757	1.58011	0.474753
0.033589	1.58	0.475481
0.034421	1.58135	0.476563
0.035253	1.58593	0.477429
0.036084	1.58977	0.478817
0.036916	1.59436	0.481139
0.037748	1.60015	0.483363
0.03858	1.60651	0.485875
0.039412	1.61264	0.489103
0.040244	1.61902	0.493556
0.041075	1.62738	0.498173
0.041907	1.6372	0.503642
0.042739	1.64736	0.509486
0.043571	1.65878	0.515644
0.044403	1.66919	0.52247
0.045234	1.68069	0.531594
0.046066	1.6929	0.540021
0.046898	1.70391	0.551557
0.04773	1.71374	0.563227
0.048562	1.72297	0.572682
0.049394	1.73236	0.579316
0.050225	1.74315	0.584273
0.051057	1.75519	0.589557
0.051889	1.76633	0.594235
0.052721	1.77794	0.601175
0.053553	1.79398	0.607293
0.054384	1.80957	0.612886
0.055216	1.82272	0.6231
0.056048	1.83222	0.632718
0.05688	1.83968	0.639702
0.057712	1.84779	0.644168
0.058544	1.86003	0.649182
0.059375	1.872	0.653314
0.060207	1.88207	0.656914
0.061039	1.89046	0.6609
0.061871	1.89841	0.665099
0.062703	1.90387	0.669444
0.063534	1.90778	0.67372
0.064366	1.91115	0.678925
0.065198	1.91365	0.683061
0.06603	1.9151	0.68574
0.066862	1.91629	0.690136
0.067694	1.91914	0.69409
0.068525	1.92186	0.697188
0.069357	1.92399	0.70118
0.070189	1.92667	0.704897
0.071021	1.92973	0.706595
0.071853	1.9306	0.709425
0.072684	1.93391	0.712029
0.073516	1.93641	0.715591
0.074348	1.93875	0.721442
0.07518	1.94022	0.727972
0.076012	1.94653	0.73277
0.076844	1.94972	0.734708
0.077675	1.94916	0.735893
0.078507	1.94587	0.73654
0.079339	1.94292	0.737605
0.080171	1.93757	0.739674
0.081003	1.93287	0.740376
0.081834	1.9277	0.738533
0.082666	1.92233	0.735721
0.083498	1.91415	0.732325
0.08433	1.90539	0.729584
0.085162	1.89519	0.726059
0.085994	1.8866	0.721951
0.086825	1.87623	0.716105
0.087657	1.86664	0.709662
0.088489	1.85839	0.701378
0.089321	1.84981	0.694268
0.090153	1.84218	0.689025
0.090984	1.83381	0.685363
0.091816	1.82446	0.683085
0.092648	1.81482	0.682683
0.09348	1.80558	0.682091
0.094312	1.79765	0.679776
0.095144	1.78554	0.676478
0.095975	1.77276	0.673416
0.096807	1.76316	0.668123
0.097639	1.75936	0.66192
0.098471	1.75778	0.658203
0.099303	1.75624	0.657553
0.100134	1.74918	0.655878
0.100966	1.74321	0.654109
0.101798	1.73655	0.653664
0.10263	1.73249	0.655112
0.103462	1.73312	0.656323
0.104294	1.73441	0.658482
0.105125	1.73591	0.660467
0.105957	1.73983	0.662009
0.106789	1.74478	0.663669
0.107621	1.75473	0.666698
0.108453	1.76903	0.670196
0.109284	1.77834	0.674509
0.110116	1.78538	0.679534
0.110948	1.79434	0.682921
0.11178	1.80392	0.687231
0.112612	1.81122	0.692683
0.113444	1.82138	0.698906
0.114275	1.83061	0.70439
0.115107	1.84128	0.707487
0.115939	1.85312	0.709667
0.116771	1.8664	0.71006
0.117603	1.8726	0.71319
0.118434	1.87789	0.71914
0.119266	1.8873	0.726255
0.120098	1.89928	0.732984
0.12093	1.91036	0.740316
0.121762	1.92376	0.746488
0.122594	1.93728	0.753581
0.123425	1.95198	0.762521
0.124257	1.96606	0.771407
0.125089	1.98171	0.779676
0.125921	1.99849	0.78788
0.126753	2.01497	0.796843
0.127584	2.0308	0.806094
0.128416	2.0481	0.814654
0.129248	2.06498	0.824104
0.13008	2.08099	0.833986
0.130912	2.09882	0.845212
0.131744	2.11762	0.85634
0.132575	2.13969	0.869577
0.133407	2.16287	0.881814
0.134239	2.18334	0.891485
0.135071	2.20603	0.901699
0.135903	2.22645	0.913129
0.136734	2.24801	0.925913
0.137566	2.27005	0.938351
0.138398	2.29182	0.950442
0.13923	2.31238	0.963389
0.140062	2.3326	0.977553
0.140894	2.35404	0.991972
0.141725	2.37617	1.00704
0.142557	2.39858	1.02378
0.143389	2.42091	1.03988
0.144221	2.4433	1.05368
0.145053	2.463	1.06744
0.145884	2.48229	1.07815
0.146716	2.50241	1.09209
0.147548	2.5216	1.10648
0.14838	2.54028	1.12106
0.149212	2.55353	1.13516
0.150044	2.56447	1.14852
0.150875	2.57918	1.16092
0.151707	2.59733	1.17327
0.152539	2.61314	1.18606
0.153371	2.62799	1.19825
0.154203	2.64499	1.21148
0.155034	2.66034	1.22357
0.155866	2.67554	1.23524
0.156698	2.69108	1.24834
0.15753	2.70446	1.2601
0.158362	2.71821	1.27418
0.159194	2.73149	1.28614
0.160025	2.74562	1.29753
0.160857	2.7598	1.30755
0.161689	2.77353	1.31753
0.162521	2.78682	1.32733
0.163353	2.79999	1.33671
0.164184	2.81203	1.34608
0.165016	2.82208	1.35468
0.165848	2.83229	1.363
0.16668	2.84206	1.372
0.167512	2.85127	1.37931
0.168344	2.85898	1.38698
0.169175	2.86911	1.39476
0.170007	2.87753	1.40376
0.170839	2.88496	1.41186
0.171671	2.89184	1.41756
0.172503	2.89851	1.42048
0.173334	2.9038	1.42446
0.174166	2.90602	1.42876
0.174998	2.90717	1.43201
0.17583	2.91116	1.43531
0.176662	2.91245	1.43946
0.177494	2.91449	1.44196
0.178325	2.91576	1.44339
0.179157	2.9156	1.4441
0.179989	2.915	1.44394
0.180821	2.91302	1.44481
0.181653	2.91217	1.44429
0.182484	2.91032	1.44218
0.183316	2.90754	1.44017
0.184148	2.9036	1.43614
0.18498	2.90066	1.43235
0.185812	2.89769	1.42834
0.186644	2.89314	1.42328
0.187475	2.88817	1.41991
0.188307	2.88329	1.41531
0.189139	2.87879	1.41191
0.189971	2.87441	1.40956
0.190803	2.87094	1.40541
0.191634	2.86627	1.40115
0.192466	2.86096	1.39671
0.193298	2.85467	1.39118
0.19413	2.84909	1.38528
0.194962	2.84427	1.37946
0.195794	2.83843	1.37356
0.196625	2.83297	1.367
0.197457	2.82685	1.36124
0.198289	2.81963	1.35605
0.199121	2.81302	1.35027
0.199953	2.80579	1.34331
0.200784	2.79883	1.33708
0.201616	2.79244	1.33164
0.202448	2.78664	1.32636
0.20328	2.78075	1.32099
0.204112	2.7742	1.31427
0.204944	2.76641	1.30767
0.205775	2.7591	1.30093
0.206607	2.75361	1.29369
0.207439	2.74717	1.28683
0.208271	2.74026	1.27999
0.209103	2.73235	1.27472
0.209934	2.72763	1.26824
0.210766	2.72123	1.26091
0.211598	2.71378	1.25388
0.21243	2.7069	1.24726
0.213262	2.70105	1.24168
0.214094	2.69623	1.23558
0.214925	2.69156	1.22908
0.215757	2.68767	1.22077
0.216589	2.68152	1.21434
0.217421	2.67404	1.20829
0.218253	2.66636	1.20216
0.219084	2.65764	1.19575
0.219916	2.64969	1.19013
0.220748	2.64253	1.18554
0.22158	2.63597	1.18111
0.222412	2.62956	1.17599
0.223243	2.62167	1.17124
0.224075	2.61374	1.16699
0.224907	2.60685	1.16192
0.225739	2.59993	1.15738
0.226571	2.59197	1.15264
0.227403	2.58508	1.14841
0.228234	2.57741	1.14396
0.229066	2.56945	1.13931
0.229898	2.56292	1.13563
0.23073	2.55689	1.12937
0.231562	2.55085	1.12208
0.232393	2.54315	1.11635
0.233225	2.53508	1.11167
0.234057	2.52769	1.10743
0.234889	2.52158	1.10341
0.235721	2.5141	1.09971
0.236553	2.50577	1.09628
0.237384	2.49779	1.09391
0.238216	2.49031	1.0926
0.239048	2.4832	1.09015
0.23988	2.47555	1.08711
0.240712	2.46797	1.08329
0.241543	2.46104	1.0795
0.242375	2.45389	1.07558
0.243207	2.44564	1.07187
0.244039	2.43766	1.06849
0.244871	2.43007	1.06609
0.245703	2.42323	1.06341
0.246534	2.4164	1.05998
0.247366	2.4103	1.05711
0.248198	2.4048	1.0549
0.24903	2.39879	1.05226
0.249862	2.39251	1.04943
0.250693	2.38641	1.04634
0.251525	2.37886	1.04369
0.252357	2.37028	1.04156
0.253189	2.36339	1.03906
0.254021	2.35689	1.0364
0.254853	2.34989	1.03341
0.255684	2.34113	1.03138
0.256516	2.33192	1.02941
0.257348	2.32218	1.02591
0.25818	2.31477	1.02278
0.259012	2.30752	1.02052
0.259843	2.30151	1.01772
0.260675	2.29711	1.01481
0.261507	2.29114	1.01221
0.262339	2.28455	1.00976
0.263171	2.27774	1.00683
0.264003	2.27097	1.00268
0.264834	2.26412	0.999599
0.265666	2.2576	0.996919
0.266498	2.25048	0.995432
0.26733	2.24323	0.993655
0.268162	2.23667	0.990401
0.268993	2.23001	0.986881
0.269825	2.2243	0.983625
0.270657	2.21934	0.980615
0.271489	2.21387	0.977114
0.272321	2.20698	0.974314
0.273153	2.20092	0.971595
0.273984	2.19566	0.968815
0.274816	2.19053	0.965415
0.275648	2.1846	0.961415
0.27648	2.17762	0.958344
0.277312	2.17176	0.955054
0.278143	2.16625	0.952109
0.278975	2.16053	0.948077
0.279807	2.15519	0.943166
0.280639	2.14929	0.938857
0.281471	2.14483	0.935509
0.282303	2.13926	0.932208
0.283134	2.13369	0.929296
0.283966	2.12947	0.926121
0.284798	2.12548	0.923087
0.28563	2.1208	0.9205
0.286462	2.11527	0.916847
0.287293	2.10994	0.914109
0.288125	2.10555	0.911352
0.288957	2.10007	0.909565
0.289789	2.09359	0.906755
0.290621	2.08752	0.90476
0.291453	2.08198	0.9022
0.292284	2.07685	0.900813
0.293116	2.07143	0.900108
0.293948	2.06637	0.898154
0.29478	2.06171	0.896188
0.295612	2.05758	0.89316
0.296443	2.05327	0.889489
0.297275	2.04882	0.886454
0.298107	2.0447	0.883857
0.298939	2.04045	0.88255
0.299771	2.03585	0.879608
0.300603	2.03119	0.876809
0.301434	2.02631	0.87473
0.302266	2.0207	0.87283
0.303098	2.01595	0.871792
0.30393	2.01228	0.870395
0.304762	2.00815	0.868916
0.305593	2.00379	0.868702
0.306425	1.99932	0.867135
0.307257	1.99551	0.864899
0.308089	1.99192	0.862146
0.308921	1.9886	0.859286
0.309753	1.98501	0.857586
0.310584	1.98076	0.855978
0.311416	1.97735	0.854583
0.312248	1.97425	0.852984
0.31308	1.9695	0.850929
0.313912	1.96491	0.848833
0.314743	1.95983	0.847105
0.315575	1.95516	0.845486
0.316407	1.95041	0.844018
0.317239	1.94558	0.841763
0.318071	1.94155	0.839155
0.318903	1.93712	0.837105
0.319734	1.93294	0.8355
0.320566	1.92865	0.833623
0.321398	1.92494	0.832233
0.32223	1.92151	0.831116
0.323062	1.91817	0.829861
0.323893	1.91482	0.828578
0.324725	1.91118	0.827401
0.325557	1.90706	0.826659
0.326389	1.90348	0.825161
0.327221	1.89905	0.822771
0.328053	1.896	0.821595
0.328884	1.89173	0.820153
0.329716	1.88704	0.818792
0.330548	1.8824	0.8166
0.33138	1.87905	0.814492
0.332212	1.8763	0.812494
0.333043	1.87268	0.810565
0.333875	1.869	0.807957
0.334707	1.86587	0.805095
0.335539	1.8626	0.803402
0.336371	1.85962	0.801178
0.337203	1.85577	0.800197
0.338034	1.85213	0.800059
0.338866	1.84838	0.798586
0.339698	1.8442	0.79658
0.34053	1.84038	0.794829
0.341362	1.8373	0.793875
0.342193	1.83459	0.793656
0.343025	1.83143	0.792719
0.343857	1.82765	0.792213
0.344689	1.824	0.790758
0.345521	1.82035	0.788197
0.346353	1.81689	0.786008
0.347184	1.81365	0.78323
0.348016	1.81068	0.781246
0.348848	1.80753	0.779362
0.34968	1.80459	0.777068
0.350512	1.802	0.777013
0.351343	1.79882	0.776982
0.352175	1.7957	0.776233
0.353007	1.7918	0.77447
0.353839	1.78763	0.772305
0.354671	1.78484	0.770901
0.355503	1.78241	0.769736
0.356334	1.78026	0.767942
0.357166	1.77785	0.765787
0.357998	1.77491	0.763925
0.35883	1.77305	0.763526
0.359662	1.771	0.762967
0.360493	1.76847	0.761746
0.361325	1.76612	0.760436
0.362157	1.76394	0.75948
0.362989	1.7609	0.7581
0.363821	1.75804	0.756045
0.364653	1.75538	0.753709
0.365484	1.75218	0.752206
0.366316	1.74944	0.7505
0.367148	1.74726	0.748583
0.36798	1.74477	0.747621
0.368812	1.74289	0.746696
0.369643	1.74037	0.74548
0.370475	1.73784	0.744386
0.371307	1.73566	0.743366
0.372139	1.73405	0.742485
0.372971	1.73167	0.741782
0.373803	1.72831	0.740644
0.374634	1.72589	0.739618
0.375466	1.72334	0.738022
0.376298	1.72066	0.736184
0.37713	1.71825	0.734107
0.377962	1.71501	0.732259
0.378793	1.71108	0.730343
0.379625	1.7084	0.728562
0.380457	1.70657	0.727414
0.381289	1.70465	0.726261
0.382121	1.7028	0.725046
0.382953	1.70014	0.723759
0.383784	1.69708	0.721739
0.384616	1.69425	0.719834
0.385448	1.69254	0.717828
0.38628	1.69089	0.715295
0.387112	1.68891	0.713909
0.387943	1.68736	0.712574
0.388775	1.68653	0.711059
0.389607	1.68526	0.709795
0.390439	1.68317	0.708514
0.391271	1.68075	0.707518
0.392103	1.67873	0.705113
0.392934	1.67726	0.702295
0.393766	1.6752	0.70012
0.394598	1.67268	0.698494
0.39543	1.67051	0.698004
0.396262	1.66877	0.69732
0.397093	1.66711	0.696134
0.397925	1.6646	0.694743
0.398757	1.66174	0.693391
0.399589	1.65972	0.691311
0.400421	1.65779	0.689911
0.401253	1.65588	0.688466
0.402084	1.65459	0.687171
0.402916	1.65324	0.685888
0.403748	1.65117	0.684342
0.40458	1.64882	0.682902
0.405412	1.6459	0.681944
0.406243	1.64237	0.680964
0.407075	1.64046	0.678952
0.407907	1.63882	0.677871
0.408739	1.63634	0.676525
0.409571	1.63359	0.675016
0.410403	1.63109	0.673342
0.411234	1.62868	0.671681
0.412066	1.62727	0.670238
0.412898	1.62612	0.668949
0.41373	1.62466	0.667739
0.414562	1.62287	0.666415
0.415393	1.62125	0.665113
0.416225	1.61966	0.664182
0.417057	1.61789	0.663496
0.417889	1.61553	0.662828
0.418721	1.61316	0.661809
0.419553	1.61166	0.660376
0.420384	1.61075	0.659021
0.421216	1.60959	0.657812
0.422048	1.60784	0.656312
0.42288	1.60625	0.655084
0.423712	1.60405	0.653722
0.424543	1.60151	0.652308
0.425375	1.6	0.651369
0.426207	1.59908	0.650275
0.427039	1.59748	0.649214
0.427871	1.59526	0.648424
0.428703	1.59373	0.647422
0.429534	1.5919	0.646868
0.430366	1.58933	0.646934
0.431198	1.58619	0.646088
0.43203	1.58354	0.645316
0.432862	1.58132	0.644784
0.433693	1.57918	0.644192
0.434525	1.57714	0.643946
0.435357	1.57571	0.64348
0.436189	1.57412	0.642834
0.437021	1.57182	0.642004
0.437853	1.56904	0.640947
0.438684	1.56676	0.639838
0.439516	1.56508	0.638915
0.440348	1.56359	0.638664
0.44118	1.56237	0.638521
0.442012	1.5606	0.637839
0.442843	1.55832	0.637117
0.443675	1.55589	0.636175
0.444507	1.55376	0.634483
0.445339	1.55226	0.632995
0.446171	1.5511	0.632428
0.447003	1.55031	0.632146
0.447834	1.54978	0.631528
0.448666	1.54849	0.631488
0.449498	1.54691	0.631728
0.45033	1.54523	0.631583
0.451162	1.54331	0.631082
0.451993	1.54191	0.630432
0.452825	1.54038	0.62924
0.453657	1.53769	0.627583
0.454489	1.5345	0.626435
0.455321	1.53228	0.62553
0.456152	1.53041	0.624796
0.456984	1.52897	0.624293
0.457816	1.52678	0.623438
0.458648	1.52473	0.62227
0.45948	1.52336	0.621158
0.460312	1.52274	0.620311
0.461143	1.52171	0.619978
0.461975	1.51909	0.619634
0.462807	1.51755	0.619145
0.463639	1.51603	0.618765
0.464471	1.51426	0.618567
0.465302	1.51207	0.618629
0.466134	1.5113	0.618518
0.466966	1.50981	0.617641
0.467798	1.50791	0.616323
0.46863	1.5069	0.61507
0.469462	1.50597	0.613791
0.470293	1.50448	0.612779
0.471125	1.5027	0.611781
0.471957	1.5009	0.609973
0.472789	1.50061	0.609299
0.473621	1.50052	0.608446
0.474452	1.5008	0.607507
0.475284	1.4993	0.607202
0.476116	1.49744	0.606544
0.476948	1.49537	0.60498
0.47778	1.49452	0.60428
0.478612	1.49364	0.604207
0.479443	1.49249	0.603967
0.480275	1.49155	0.604602
0.481107	1.49026	0.605468
0.481939	1.48876	0.605011
0.482771	1.48644	0.604681
0.483602	1.48389	0.604824
0.484434	1.4819	0.604114
0.485266	1.47987	0.604211
0.486098	1.47915	0.60419
0.48693	1.47854	0.604064
0.487762	1.47754	0.602967
0.488593	1.47602	0.601279
0.489425	1.47466	0.599918
0.490257	1.47306	0.598614
0.491089	1.47128	0.597424
0.491921	1.46973	0.597065
0.492752	1.46915	0.59682
0.493584	1.4679	0.596443
0.494416	1.46678	0.596728
0.495248	1.46605	0.59695
0.49608	1.46459	0.597165
0.496912	1.46263	0.597192
0.497743	1.46158	0.597518
0.498575	1.46049	0.597655
0.499407	1.45976	0.597282
0.500239	1.45841	0.597101
0.501071	1.4576	0.597088
0.501903	1.45636	0.59702
0.502734	1.4555	0.596755
0.503566	1.45626	0.596279
0.504398	1.4545	0.596039
0.50523	1.45327	0.595726
0.506062	1.45186	0.594534
0.506893	1.45104	0.593188
0.507725	1.4498	0.593161
0.508557	1.44828	0.593054
0.509389	1.44769	0.592989
0.510221	1.44647	0.593522
0.511052	1.4451	0.594182
0.511884	1.44321	0.594296
0.512716	1.4423	0.593938
0.513548	1.4419	0.593272
0.51438	1.43957	0.592855
0.515212	1.43845	0.592697
0.516043	1.43672	0.592491
0.516875	1.43549	0.591854
0.517707	1.43475	0.591275
0.518539	1.43402	0.591443
0.519371	1.43207	0.590889
0.520203	1.43075	0.589554
0.521034	1.4296	0.588551
0.521866	1.42755	0.587357
0.522698	1.42577	0.585921
0.52353	1.42559	0.584835
0.524362	1.42553	0.584271
0.525193	1.42573	0.584418
0.526025	1.42572	0.585075
0.526857	1.4249	0.583757
0.527689	1.42314	0.583347
0.528521	1.42169	0.582634
0.529352	1.42011	0.582386
0.530184	1.41854	0.582844
0.531016	1.41812	0.582418
0.531848	1.41778	0.582544
0.53268	1.4166	0.582811
0.533512	1.41596	0.582312
0.534343	1.41439	0.580558
0.535175	1.41296	0.580371
0.536007	1.41164	0.579481
0.536839	1.41158	0.579294
0.537671	1.41294	0.578529
0.538503	1.414	0.577541
0.539334	1.41246	0.576505
0.540166	1.41022	0.574856
0.540998	1.40845	0.574749
0.54183	1.40731	0.574476
0.542662	1.40536	0.57346
0.543493	1.40376	0.572772
0.544325	1.40177	0.572097
0.545157	1.40007	0.571117
0.545989	1.39816	0.570548
0.546821	1.39655	0.571113
0.547652	1.39564	0.571331
0.548484	1.39485	0.571855
0.549316	1.39313	0.570679
0.550148	1.39207	0.570231
0.55098	1.39044	0.570191
0.551812	1.38879	0.568335
0.552643	1.38793	0.56666
0.553475	1.38731	0.565935
0.554307	1.38637	0.565453
0.555139	1.38384	0.565592
0.555971	1.3833	0.565037
0.556803	1.38097	0.564124
0.557634	1.37903	0.56411
0.558466	1.37763	0.563239
0.559298	1.37566	0.562158
0.56013	1.37449	0.561131
0.560962	1.37406	0.560972
0.561793	1.37332	0.560758
0.562625	1.37182	0.560604
0.563457	1.37193	0.559706
0.564289	1.37239	0.558884
0.565121	1.37042	0.558828
0.565952	1.36936	0.558289
0.566784	1.36756	0.557108
0.567616	1.3656	0.556231
0.568448	1.36493	0.555847
0.56928	1.36415	0.555707
0.570112	1.36214	0.556101
0.570943	1.36161	0.555274
0.571775	1.36099	0.554696
0.572607	1.35966	0.554035
0.573439	1.35756	0.553944
0.574271	1.35735	0.552815
0.575103	1.35765	0.551886
0.575934	1.35662	0.55214
0.576766	1.35646	0.551437
0.577598	1.35638	0.551883
0.57843	1.3547	0.550901
0.579262	1.35178	0.550986
0.580093	1.35038	0.551065
0.580925	1.34956	0.550383
0.581757	1.3495	0.550187
0.582589	1.34945	0.5487
0.583421	1.34951	0.547893
0.584252	1.34968	0.548157
0.585084	1.34862	0.547825
0.585916	1.34807	0.547992
0.586748	1.34741	0.548056
0.58758	1.34793	0.547529
0.588412	1.3479	0.546228
0.589243	1.34775	0.545694
0.590075	1.34627	0.544855
0.590907	1.34577	0.545018
0.591739	1.3444	0.543563
0.592571	1.34336	0.542552
0.593402	1.34252	0.543052
0.594234	1.34159	0.542754
0.595066	1.34008	0.542772
0.595898	1.33864	0.54146
0.59673	1.33783	0.540739
0.597562	1.33665	0.540638
0.598393	1.33651	0.540887
0.599225	1.33619	0.540368
0.600057	1.33561	0.540732
0.600889	1.33496	0.541863
0.601721	1.33377	0.542396
0.602552	1.33252	0.542377
0.603384	1.3311	0.542455
0.604216	1.33039	0.541666
0.605048	1.32881	0.541295
0.60588	1.32678	0.541023
0.606712	1.32668	0.540794
0.607543	1.32611	0.541424
0.608375	1.32547	0.541394
0.609207	1.32454	0.540392
0.610039	1.32352	0.539626
0.610871	1.32239	0.538778
0.611702	1.32256	0.537459
0.612534	1.32138	0.537775
0.613366	1.3206	0.537523
0.614198	1.31927	0.537877
0.61503	1.31888	0.537101
0.615862	1.31733	0.53708
0.616693	1.31503	0.536923
0.617525	1.31496	0.53626
0.618357	1.31313	0.536204
0.619189	1.31185	0.535491
0.620021	1.31126	0.535343
0.620852	1.31075	0.534862
0.621684	1.30987	0.534388
0.622516	1.3091	0.533678
0.623348	1.30862	0.534492
0.62418	1.30691	0.534304
0.625012	1.30552	0.534109
0.625843	1.30382	0.533302
0.626675	1.30289	0.532525
0.627507	1.30146	0.532138
0.628339	1.30009	0.532245
0.629171	1.29937	0.532862
0.630002	1.29805	0.533022
0.630834	1.29593	0.533219
0.631666	1.29571	0.533561
0.632498	1.29598	0.533384
0.63333	1.29486	0.533471
0.634162	1.29476	0.533533
0.634993	1.29464	0.533081
0.635825	1.29307	0.533713
0.636657	1.29179	0.533673
0.637489	1.29167	0.534953
0.638321	1.29155	0.534731
0.639152	1.29148	0.534893
0.639984	1.29106	0.53526
0.640816	1.29042	0.534743
0.641648	1.29045	0.533779
0.64248	1.28976	0.533032
0.643312	1.28928	0.532099
0.644143	1.28832	0.530831
0.644975	1.28925	0.529906
0.645807	1.28884	0.530223
0.646639	1.28875	0.5305
0.647471	1.2885	0.530012
0.648302	1.2869	0.530299
0.649134	1.28615	0.528967
0.649966	1.28545	0.527662
0.650798	1.28519	0.527114
0.65163	1.28455	0.527207
0.652462	1.28451	0.528545
0.653293	1.28421	0.528846
0.654125	1.28284	0.529457
0.654957	1.28187	0.529895
0.655789	1.2811	0.529255
0.656621	1.28032	0.529583
0.657452	1.27926	0.529678
0.658284	1.27909	0.529503
0.659116	1.2781	0.529624
0.659948	1.27738	0.529083
0.66078	1.27686	0.52927
0.661612	1.27628	0.528318
0.662443	1.2757	0.52813
0.663275	1.27453	0.528209
0.664107	1.2739	0.528541
0.664939	1.27306	0.527635
0.665771	1.27284	0.528002
0.666602	1.2717	0.527785
0.667434	1.27149	0.527775
0.668266	1.27111	0.527479
0.669098	1.27076	0.526761
0.66993	1.26975	0.526251
0.670762	1.26954	0.525396
0.671593	1.26902	0.524893
0.672425	1.26919	0.523716
0.673257	1.26812	0.523132
0.674089	1.26629	0.523362
0.674921	1.26595	0.523469
0.675752	1.2651	0.522649
0.676584	1.26444	0.52268
0.677416	1.26463	0.522349
0.678248	1.26466	0.521928
0.67908	1.2636	0.521454
0.679912	1.26225	0.521288
0.680743	1.26052	0.519887
0.681575	1.25919	0.518586
0.682407	1.25835	0.517791
0.683239	1.2576	0.517922
0.684071	1.25717	0.516973
0.684902	1.25727	0.517099
0.685734	1.25695	0.517636
0.686566	1.2556	0.517669
0.687398	1.25497	0.517312
0.68823	1.25392	0.515661
0.689062	1.25418	0.515348
0.689893	1.25441	0.514388
0.690725	1.25417	0.514224
0.691557	1.25433	0.514231
0.692389	1.25366	0.514257
0.693221	1.25272	0.514146
0.694052	1.25219	0.512589
0.694884	1.25062	0.511921
0.695716	1.24988	0.510977
0.696548	1.24917	0.509674
0.69738	1.24833	0.508782
0.698212	1.24677	0.508297
0.699043	1.2475	0.507729
0.699875	1.24702	0.507064
0.700707	1.24673	0.507022
0.701539	1.24663	0.505742
0.702371	1.24544	0.504586
0.703202	1.24431	0.505362
0.704034	1.24376	0.504408
0.704866	1.24374	0.504151
0.705698	1.24249	0.504076
0.70653	1.24272	0.504103
0.707362	1.24188	0.503731
0.708193	1.24208	0.503736
0.709025	1.24061	0.502544
0.709857	1.24102	0.502505
0.710689	1.24008	0.50228
0.711521	1.23942	0.50133
0.712352	1.23839	0.501349
0.713184	1.23772	0.500247
0.714016	1.23687	0.499724
0.714848	1.23655	0.499086
0.71568	1.23666	0.498998
0.716511	1.2365	0.498717
0.717343	1.23622	0.499435
0.718175	1.23551	0.49862
0.719007	1.23483	0.497949
0.719839	1.23428	0.498113
0.720671	1.23392	0.497437
0.721502	1.23402	0.4981
0.722334	1.23493	0.498754
0.723166	1.23519	0.499099
0.723998	1.23516	0.499494
0.72483	1.23506	0.499423
0.725662	1.23463	0.500131
0.726493	1.23359	0.499067
0.727325	1.23272	0.498498
0.728157	1.23246	0.49812
0.728989	1.2319	0.497275
0.729821	1.23173	0.497456
0.730652	1.23094	0.497279
0.731484	1.23018	0.497835
0.732316	1.2291	0.497673
0.733148	1.22785	0.497452
0.73398	1.22758	0.49757
0.734811	1.22691	0.497714
0.735643	1.22651	0.497915
0.736475	1.22615	0.49796
0.737307	1.22582	0.497676
0.738139	1.22547	0.497718
0.738971	1.22577	0.498171
0.739802	1.22661	0.498126
0.740634	1.22622	0.497701
0.741466	1.22573	0.497095
0.742298	1.2248	0.496847
0.74313	1.2239	0.497798
0.743962	1.22425	0.497838
0.744793	1.22397	0.497197
0.745625	1.22327	0.496946
0.746457	1.22224	0.496252
0.747289	1.22203	0.495445
0.748121	1.22137	0.494541
0.748952	1.22145	0.494529
0.749784	1.2213	0.494079
0.750616	1.22107	0.494859
0.751448	1.22035	0.495016
0.75228	1.22033	0.494949
0.753111	1.22019	0.494575
0.753943	1.21939	0.49508
0.754775	1.21923	0.495493
0.755607	1.2189	0.495613
0.756439	1.2179	0.495808
0.757271	1.21687	0.49477
0.758102	1.21632	0.493667
0.758934	1.21596	0.493626
0.759766	1.21533	0.493899
0.760598	1.2145	0.493847
0.76143	1.21395	0.493204
0.762262	1.21336	0.494181
0.763093	1.21267	0.493962
0.763925	1.2115	0.493467
0.764757	1.21067	0.493131
0.765589	1.20966	0.492808
0.766421	1.209	0.491861
0.767252	1.20873	0.490851
0.768084	1.20831	0.491104
0.768916	1.20769	0.491342
0.769748	1.20703	0.491398
0.77058	1.20662	0.491208
0.771411	1.20589	0.49212
0.772243	1.2048	0.492185
0.773075	1.20374	0.491884
0.773907	1.2032	0.491485
0.774739	1.2029	0.491149
0.775571	1.20201	0.490522
0.776402	1.20179	0.490155
0.777234	1.20155	0.489748
0.778066	1.20112	0.488943
0.778898	1.2009	0.489215
0.77973	1.20075	0.48874
0.780562	1.19993	0.487983
0.781393	1.19924	0.488798
0.782225	1.19851	0.489035
0.783057	1.19791	0.488398
0.783889	1.19765	0.487366
0.784721	1.19711	0.486334
0.785552	1.19589	0.486065
0.786384	1.19521	0.48648
0.787216	1.19493	0.486124
0.788048	1.19497	0.486036
0.78888	1.19437	0.486024
0.789711	1.19346	0.485793
0.790543	1.19301	0.485189
0.791375	1.19262	0.485015
0.792207	1.19319	0.484961
0.793039	1.19312	0.484598
0.793871	1.19277	0.484675
0.794702	1.19331	0.485708
0.795534	1.1929	0.484913
0.796366	1.19212	0.484463
0.797198	1.19168	0.484498
0.79803	1.19172	0.484479
0.798862	1.19159	0.484463
0.799693	1.19083	0.484775
0.800525	1.19039	0.483815
0.801357	1.19024	0.482762
0.802189	1.19021	0.482104
0.803021	1.18994	0.481055
0.803852	1.18918	0.479181
0.804684	1.18838	0.478089
0.805516	1.18843	0.477852
0.806348	1.18799	0.476883
0.80718	1.18783	0.476371
0.808011	1.18747	0.4768
0.808843	1.18707	0.47733
0.809675	1.18678	0.477036
0.810507	1.18724	0.476827
0.811339	1.18716	0.476382
0.812171	1.18648	0.476475
0.813002	1.18677	0.476346
0.813834	1.18709	0.475978
0.814666	1.1874	0.476371
0.815498	1.18735	0.476801
0.81633	1.187	0.477731
0.817162	1.18707	0.478172
0.817993	1.1873	0.478018
0.818825	1.18683	0.477873
0.819657	1.18626	0.477962
0.820489	1.18623	0.477455
0.821321	1.1865	0.47747
0.822152	1.1863	0.477859
0.822984	1.18523	0.476668
0.823816	1.18481	0.476022
0.824648	1.18485	0.476654
0.82548	1.18447	0.476717
0.826311	1.18506	0.476936
0.827143	1.18557	0.477359
0.827975	1.18557	0.476794
0.828807	1.185	0.4769
0.829639	1.18431	0.476815
0.830471	1.1848	0.477091
0.831302	1.18547	0.477638
0.832134	1.18524	0.478178
0.832966	1.18496	0.477909
0.833798	1.18471	0.477442
0.83463	1.18398	0.477345
0.835461	1.18338	0.476842
0.836293	1.18232	0.475929
0.837125	1.18177	0.476631
0.837957	1.18141	0.476121
0.838789	1.18064	0.476507
0.839621	1.18061	0.475674
0.840452	1.18058	0.47475
0.841284	1.18064	0.474449
0.842116	1.18024	0.474078
0.842948	1.17958	0.47413
0.84378	1.17944	0.474866
0.844611	1.1798	0.47541
0.845443	1.18067	0.475855
0.846275	1.18096	0.476006
0.847107	1.18042	0.475517
0.847939	1.18037	0.47595
0.848771	1.18063	0.476523
0.849602	1.18052	0.476616
0.850434	1.17947	0.476488
0.851266	1.17866	0.475924
0.852098	1.17817	0.475312
0.85293	1.17753	0.475155
0.853761	1.17784	0.475244
0.854593	1.17725	0.475152
0.855425	1.17643	0.474912
0.856257	1.17601	0.47405
0.857089	1.1754	0.472996
0.857921	1.17502	0.472189
0.858752	1.1744	0.471251
0.859584	1.17383	0.470267
0.860416	1.17383	0.469654
0.861248	1.17381	0.469087
0.86208	1.17295	0.46829
0.862911	1.1718	0.467871
0.863743	1.17193	0.467583
0.864575	1.17223	0.467578
0.865407	1.17142	0.467573
0.866239	1.1706	0.467074
0.867071	1.17017	0.466674
0.867902	1.17022	0.466313
0.868734	1.17048	0.46576
0.869566	1.17046	0.466119
0.870398	1.17082	0.467237
0.87123	1.17053	0.467665
0.872061	1.16966	0.467681
0.872893	1.16904	0.46722
0.873725	1.16856	0.466896
0.874557	1.16822	0.467088
0.875389	1.16767	0.466961
0.876221	1.16721	0.46668
0.877052	1.16738	0.466741
0.877884	1.16696	0.466305
0.878716	1.16693	0.465998
0.879548	1.16701	0.466159
0.88038	1.16762	0.465825
0.881211	1.16732	0.466366
0.882043	1.16684	0.467167
0.882875	1.1669	0.467084
0.883707	1.16776	0.466814
0.884539	1.16847	0.466662
0.885371	1.16854	0.466684
0.886202	1.16779	0.46668
0.887034	1.1667	0.466414
0.887866	1.1659	0.465909
0.888698	1.16555	0.465588
0.88953	1.16584	0.465225
0.890361	1.16564	0.464976
0.891193	1.16471	0.463911
0.892025	1.16469	0.463251
0.892857	1.16523	0.463627
0.893689	1.16525	0.463963
0.894521	1.16536	0.463745
0.895352	1.16452	0.463745
0.896184	1.16427	0.463607
0.897016	1.16468	0.463066
0.897848	1.16459	0.463356
0.89868	1.16421	0.463132
0.899511	1.16372	0.462443
0.900343	1.16419	0.461951
0.901175	1.16429	0.462315
0.902007	1.16358	0.462799
0.902839	1.1631	0.462881
0.903671	1.16261	0.462914
0.904502	1.16304	0.463085
0.905334	1.16309	0.46324
0.906166	1.16303	0.463516
0.906998	1.16351	0.46348
0.90783	1.16391	0.463678
0.908661	1.16394	0.464224
0.909493	1.16317	0.464845
0.910325	1.16183	0.465181
0.911157	1.16142	0.465127
0.911989	1.16211	0.464114
0.912821	1.16247	0.46316
0.913652	1.16266	0.46249
0.914484	1.16294	0.462201
0.915316	1.16301	0.462006
0.916148	1.16331	0.461614
0.91698	1.16322	0.461922
0.917811	1.16348	0.461843
0.918643	1.16378	0.461401
0.919475	1.16388	0.461304
0.920307	1.16395	0.46146
0.921139	1.16411	0.460739
0.921971	1.16442	0.4603
0.922802	1.16498	0.460237
0.923634	1.16466	0.459875
0.924466	1.16355	0.459857
0.925298	1.16278	0.460652
0.92613	1.1625	0.460655
0.926961	1.16294	0.459471
0.927793	1.16326	0.45936
0.928625	1.16374	0.460153
0.929457	1.16363	0.460052
0.930289	1.16439	0.46013
0.931121	1.16344	0.460124
0.931952	1.16257	0.459501
0.932784	1.16234	0.45923
0.933616	1.16251	0.459514
0.934448	1.16224	0.45938
0.93528	1.16247	0.45903
0.936111	1.16175	0.459296
0.936943	1.16174	0.459486
0.937775	1.16116	0.459445
0.938607	1.1602	0.459611
0.939439	1.1593	0.46002
0.940271	1.1591	0.460591
0.941102	1.15932	0.460901
0.941934	1.15909	0.46078
0.942766	1.15894	0.460261
0.943598	1.15977	0.460293
0.94443	1.1596	0.460554
0.945261	1.16006	0.460844
0.946093	1.16004	0.460725
0.946925	1.15967	0.460145
0.947757	1.15883	0.460503
0.948589	1.159	0.460324
0.949421	1.15864	0.45903
0.950252	1.15907	0.458795
0.951084	1.15899	0.458611
0.951916	1.15945	0.458656
0.952748	1.15991	0.458327
0.95358	1.15888	0.458085
0.954411	1.15795	0.45871
0.955243	1.15826	0.459018
0.956075	1.15728	0.459119
0.956907	1.15658	0.458698
0.957739	1.15587	0.458107
0.958571	1.15502	0.458138
0.959402	1.15453	0.459709
0.960234	1.15406	0.460047
0.961066	1.15445	0.460314
0.961898	1.15405	0.460256
0.96273	1.15383	0.460535
0.963561	1.15366	0.460753
0.964393	1.15256	0.460362
0.965225	1.15288	0.459994
0.966057	1.15441	0.459527
0.966889	1.15441	0.459417
0.967721	1.15394	0.459367
0.968552	1.15274	0.459482
0.969384	1.15254	0.45946
0.970216	1.15236	0.459005
0.971048	1.15261	0.45915
0.97188	1.15234	0.45987
0.972711	1.15192	0.459952
0.973543	1.15159	0.460617
0.974375	1.15189	0.461117
0.975207	1.15185	0.461423
0.976039	1.15147	0.461809
0.97687	1.1508	0.462692
0.977702	1.15115	0.463024
0.978534	1.15099	0.462767
0.979366	1.15083	0.462516
0.980198	1.15143	0.462231
0.98103	1.15245	0.461678
0.981861	1.15313	0.461151
0.982693	1.15356	0.461045
0.983525	1.1532	0.460761
0.984357	1.15252	0.460832
0.985189	1.15194	0.460203
0.986021	1.15181	0.459673
0.986852	1.1519	0.459791
0.987684	1.15222	0.459849
0.988516	1.1524	0.459702
0.989348	1.15274	0.459324
0.99018	1.15169	0.459621
0.991011	1.15171	0.460192
0.991843	1.15109	0.459887
0.992675	1.15045	0.458982
0.993507	1.15005	0.458164
0.994339	1.1496	0.458017
0.995171	1.14974	0.457937
0.996002	1.15075	0.457474
0.996834	1.14968	0.456968
0.997666	1.14972	0.456672
0.998498	1.1504	0.457105
0.99933	1.15021	0.457341
1.00016	1.15057	0.456607
1.00099	1.15058	0.454924
1.00182	1.15047	0.454826
1.00266	1.1495	0.454501
1.00349	1.14929	0.454171
1.00432	1.1503	0.454376
1.00515	1.15003	0.454857
1.00598	1.15164	0.454868
1.00682	1.15222	0.454665
1.00765	1.15103	0.454766
1.00848	1.15115	0.45477
1.00931	1.15088	0.454661
1.01014	1.15152	0.454995
1.01097	1.15194	0.454829
1.01181	1.152	0.454971
1.01264	1.15185	0.454709
1.01347	1.15186	0.454052
1.0143	1.15251	0.453534
1.01513	1.15273	0.453173
1.01597	1.15164	0.453201
1.0168	1.1515	0.4524
1.01763	1.15167	0.451366
1.01846	1.152	0.450562
1.01929	1.15162	0.450323
1.02012	1.15176	0.449556
1.02096	1.15204	0.449187
1.02179	1.15232	0.448893
1.02262	1.15169	0.448773
1.02345	1.15056	0.448494
1.02428	1.15076	0.448699
1.02512	1.15149	0.449321
1.02595	1.15189	0.449426
1.02678	1.15201	0.450008
1.02761	1.15181	0.449873
1.02844	1.152	0.449413
1.02927	1.15146	0.448912
1.03011	1.15163	0.449452
1.03094	1.15226	0.449261
1.03177	1.1521	0.448919
1.0326	1.15161	0.448927
1.03343	1.15182	0.449243
1.03427	1.15179	0.449225
1.0351	1.15189	0.449605
1.03593	1.15107	0.449204
1.03676	1.15108	0.448883
1.03759	1.14981	0.448197
1.03842	1.15078	0.448217
1.03926	1.15042	0.448367
1.04009	1.14991	0.447789
1.04092	1.14972	0.447871
1.04175	1.14992	0.4484
1.04258	1.1503	0.448262
1.04342	1.15022	0.448057
1.04425	1.15085	0.447963
1.04508	1.15155	0.448086
1.04591	1.15028	0.447704
1.04674	1.15012	0.447567
1.04757	1.14818	0.447735
1.04841	1.14675	0.448034
1.04924	1.14707	0.448192
1.05007	1.14634	0.44741
1.0509	1.1459	0.447494
1.05173	1.14599	0.448087
1.05257	1.14435	0.448499
1.0534	1.14386	0.447771
1.05423	1.14394	0.447979
1.05506	1.14316	0.447835
1.05589	1.14261	0.446949
1.05672	1.14284	0.447251
1.05756	1.14415	0.446515
1.05839	1.14399	0.447077
1.05922	1.14373	0.447832
1.06005	1.14319	0.447063
1.06088	1.14288	0.447312
1.06172	1.14266	0.447665
1.06255	1.1427	0.447306
1.06338	1.14218	0.447587
1.06421	1.14127	0.447415
1.06504	1.14148	0.447643
1.06587	1.14113	0.448288
1.06671	1.14018	0.447324
1.06754	1.13979	0.447108
1.06837	1.13884	0.446943
1.0692	1.13831	0.447389
1.07003	1.13837	0.447987
1.07087	1.13822	0.447408
1.0717	1.13692	0.447092
1.07253	1.13602	0.446282
1.07336	1.13632	0.445953
1.07419	1.13612	0.446781
1.07502	1.13504	0.445765
1.07586	1.13458	0.445893
1.07669	1.13387	0.445405
1.07752	1.13452	0.446113
1.07835	1.13391	0.445787
1.07918	1.13401	0.447043
1.08002	1.13302	0.447574
1.08085	1.1336	0.447024
1.08168	1.13344	0.446232
1.08251	1.13373	0.445861
1.08334	1.13362	0.444351
1.08418	1.1335	0.444648
1.08501	1.1337	0.444038
1.08584	1.13312	0.44336
1.08667	1.13258	0.443037
1.0875	1.13212	0.442298
1.08833	1.13129	0.442059
1.08917	1.13146	0.441669
1.09	1.13111	0.441539
1.09083	1.12981	0.441426
1.09166	1.12967	0.44182
1.09249	1.12974	0.442115
1.09333	1.12952	0.441296
1.09416	1.12857	0.441226
1.09499	1.12822	0.441457
1.09582	1.12736	0.44197
1.09665	1.12738	0.442248
1.09748	1.12667	0.443051
1.09832	1.12564	0.443196
1.09915	1.12476	0.443782
1.09998	1.12425	0.444183
1.10081	1.1242	0.44363
1.10164	1.12443	0.444243
1.10248	1.12426	0.444069
1.10331	1.12353	0.444237
1.10414	1.12217	0.444008
1.10497	1.12103	0.444227
1.1058	1.12138	0.444234
1.10663	1.1214	0.44423
1.10747	1.12084	0.44394
1.1083	1.12128	0.444645
1.10913	1.12032	0.444138
1.10996	1.12009	0.444244
1.11079	1.11996	0.442878
1.11163	1.11874	0.442224
1.11246	1.11837	0.442512
1.11329	1.11905	0.442889
1.11412	1.11889	0.442915
1.11495	1.11772	0.443069
1.11578	1.11772	0.442463
1.11662	1.11785	0.442514
1.11745	1.11776	0.442604
1.11828	1.11853	0.442828
1.11911	1.11805	0.442257
1.11994	1.11775	0.443295
1.12078	1.11715	0.442167
1.12161	1.11693	0.441751
1.12244	1.11671	0.442902
1.12327	1.11618	0.444101
1.1241	1.11529	0.443811
1.12493	1.1154	0.443636
1.12577	1.11459	0.44371
1.1266	1.11447	0.443828
1.12743	1.11346	0.444623
1.12826	1.11295	0.444432
1.12909	1.11369	0.444853
1.12993	1.11335	0.444154
1.13076	1.11303	0.444321
1.13159	1.11371	0.444242
1.13242	1.11392	0.444395
1.13325	1.11382	0.444094
1.13408	1.11414	0.444062
1.13492	1.11247	0.444308
1.13575	1.11331	0.444382
1.13658	1.11365	0.443879
1.13741	1.11365	0.443242
1.13824	1.11374	0.443174
1.13908	1.11472	0.443018
1.13991	1.1154	0.442901
1.14074	1.11512	0.441975
1.14157	1.11493	0.441916
1.1424	1.11486	0.442329
1.14323	1.1146	0.442464
1.14407	1.11411	0.442253
1.1449	1.11469	0.440672
1.14573	1.11564	0.441102
1.14656	1.11597	0.440286
1.14739	1.11535	0.440026
1.14823	1.1151	0.438165
1.14906	1.11542	0.437679
1.14989	1.11448	0.437452
1.15072	1.11511	0.438422
1.15155	1.11512	0.438185
1.15238	1.11587	0.4392
1.15322	1.11614	0.439148
1.15405	1.11538	0.439583
1.15488	1.11491	0.439321
1.15571	1.11468	0.439168
1.15654	1.11526	0.439114
1.15738	1.11579	0.438188
1.15821	1.11567	0.438467
1.15904	1.11601	0.438678
1.15987	1.11568	0.438584
1.1607	1.11579	0.438723
1.16153	1.11555	0.438466
1.16237	1.11549	0.438804
1.1632	1.11528	0.438148
1.16403	1.11408	0.436648
1.16486	1.1136	0.43624
1.16569	1.11332	0.436846
1.16653	1.1122	0.437187
1.16736	1.11109	0.436542
1.16819	1.11012	0.437098
1.16902	1.11018	0.437874
1.16985	1.1101	0.438153
1.17068	1.1093	0.438283
1.17152	1.10929	0.438508
1.17235	1.10903	0.438524
1.17318	1.1086	0.43915
1.17401	1.10902	0.439372
1.17484	1.10795	0.439453
1.17568	1.10757	0.439124
1.17651	1.1076	0.439322
1.17734	1.10789	0.438846
1.17817	1.10803	0.438713
1.179	1.10747	0.438125
1.17983	1.10763	0.437343
1.18067	1.10676	0.437307
1.1815	1.10655	0.437339
1.18233	1.10671	0.437342
1.18316	1.10629	0.436625
1.18399	1.10577	0.436469
1.18483	1.10475	0.436014
1.18566	1.1049	0.434917
1.18649	1.10421	0.436405
1.18732	1.10372	0.437205
1.18815	1.10399	0.437696
1.18898	1.104	0.437035
1.18982	1.10374	0.438337
1.19065	1.10333	0.438189
1.19148	1.10342	0.437751
1.19231	1.10267	0.438106
1.19314	1.10306	0.437697
1.19398	1.10352	0.437799
1.19481	1.10364	0.43748
1.19564	1.10387	0.437659
1.19647	1.10377	0.436926
1.1973	1.10382	0.43665
1.19813	1.10341	0.436672
1.19897	1.10254	0.436764
1.1998	1.10227	0.436558
1.20063	1.10202	0.435864
1.20146	1.10148	0.435691
1.20229	1.10051	0.43536
1.20312	1.09973	0.434253
1.20396	1.09929	0.433969
1.20479	1.09851	0.434546
1.20562	1.09797	0.434756
1.20645	1.09827	0.433936
1.20728	1.09884	0.433013
1.20812	1.09932	0.432951
1.20895	1.09986	0.433015
1.20978	1.10007	0.4319
1.21061	1.09964	0.430993
1.21144	1.09875	0.431446
1.21227	1.09864	0.431124
1.21311	1.09889	0.430758
1.21394	1.0987	0.430217
1.21477	1.09821	0.42951
1.2156	1.09782	0.428861
1.21643	1.09831	0.428128
1.21727	1.09823	0.427008
1.2181	1.09824	0.425989
1.21893	1.09856	0.426273
1.21976	1.09808	0.426478
1.22059	1.0978	0.426733
1.22142	1.09743	0.427402
1.22226	1.09677	0.427788
1.22309	1.09581	0.427493
1.22392	1.09493	0.427191
1.22475	1.09504	0.427393
1.22558	1.09421	0.427376
1.22642	1.09432	0.427267
1.22725	1.09387	0.428223
1.22808	1.09305	0.428003
1.22891	1.09254	0.426779
1.22974	1.09211	0.42628
1.23057	1.09178	0.426966
1.23141	1.09129	0.42704
1.23224	1.09023	0.426941
1.23307	1.08998	0.427417
1.2339	1.08961	0.427151
1.23473	1.08786	0.426766
1.23557	1.08596	0.425979
1.2364	1.08441	0.426081
1.23723	1.08357	0.426585
1.23806	1.08361	0.427015
1.23889	1.08278	0.427398
1.23972	1.08274	0.427375
1.24056	1.08227	0.427906
1.24139	1.0813	0.427997
1.24222	1.08058	0.428539
1.24305	1.08065	0.428489
1.24388	1.08132	0.428318
1.24472	1.08143	0.428698
1.24555	1.0806	0.428299
1.24638	1.08059	0.427667
1.24721	1.08074	0.428104
1.24804	1.08053	0.428267
1.24887	1.07962	0.428688
1.24971	1.0786	0.428735
1.25054	1.07831	0.42902
1.25137	1.07758	0.429538
1.2522	1.07676	0.42901
1.25303	1.07687	0.428118
1.25387	1.07706	0.428296
1.2547	1.07628	0.42846
1.25553	1.07527	0.428255
1.25636	1.07503	0.428041
1.25719	1.07467	0.427635
1.25802	1.0741	0.428298
1.25886	1.07329	0.429222
1.25969	1.07264	0.430456
1.26052	1.07176	0.42982
1.26135	1.07085	0.430373
1.26218	1.07022	0.430058
1.26302	1.06926	0.430144
1.26385	1.06902	0.429824
1.26468	1.06889	0.429192
1.26551	1.0688	0.429508
1.26634	1.06891	0.429347
1.26717	1.06916	0.429608
1.26801	1.06903	0.429803
1.26884	1.06873	0.428952
1.26967	1.06889	0.428541
1.2705	1.06878	0.428883
1.27133	1.0683	0.429136
1.27217	1.0675	0.429182
1.273	1.06733	0.429013
1.27383	1.06757	0.429359
1.27466	1.06734	0.428844
1.27549	1.0668	0.428062
1.27632	1.06665	0.429064
1.27716	1.06649	0.430174
1.27799	1.06639	0.43064
1.27882	1.06653	0.430165
1.27965	1.06639	0.429586
1.28048	1.0664	0.429539
1.28132	1.06562	0.429644
1.28215	1.06484	0.428949
1.28298	1.06479	0.428218
1.28381	1.06467	0.427793
1.28464	1.06421	0.427792
1.28547	1.06329	0.428162
1.28631	1.06238	0.428088
1.28714	1.06201	0.428074
1.28797	1.06157	0.428525
1.2888	1.06143	0.428866
1.28963	1.06084	0.429693
1.29047	1.06055	0.429696
1.2913	1.06008	0.429509
1.29213	1.05961	0.429301
1.29296	1.05984	0.429001
1.29379	1.05992	0.4294
1.29462	1.0599	0.429906
1.29546	1.05939	0.429603
1.29629	1.05991	0.429452
1.29712	1.06095	0.430437
1.29795	1.0612	0.431066
1.29878	1.06095	0.430678
1.29962	1.06106	0.42979
1.30045	1.06108	0.429269
1.30128	1.06063	0.428358
1.30211	1.06025	0.428253
1.30294	1.05985	0.428419
1.30377	1.05988	0.429308
1.30461	1.06025	0.429838
1.30544	1.05949	0.430129
1.30627	1.05876	0.430291
1.3071	1.059	0.430698
1.30793	1.0585	0.430752
1.30877	1.0576	0.430589
1.3096	1.05686	0.430751
1.31043	1.05639	0.43158
1.31126	1.05564	0.431197
1.31209	1.0549	0.431165
1.31292	1.05408	0.430395
1.31376	1.05367	0.430085
1.31459	1.05357	0.430042
1.31542	1.05306	0.429919
1.31625	1.05264	0.430335
1.31708	1.05217	0.430544
1.31792	1.05159	0.428959
1.31875	1.05114	0.428156
1.31958	1.0511	0.427577
1.32041	1.0517	0.427659
1.32124	1.0512	0.428421
1.32207	1.0499	0.429117
1.32291	1.04952	0.429215
1.32374	1.04927	0.429323
1.32457	1.04869	0.429999
1.3254	1.04825	0.430322
1.32623	1.04784	0.430091
1.32707	1.04744	0.430079
1.3279	1.04676	0.430381
1.32873	1.04646	0.430646
1.32956	1.04683	0.430397
1.33039	1.04665	0.42982
1.33123	1.04635	0.429419
1.33206	1.04605	0.429167
1.33289	1.04606	0.429581
1.33372	1.04651	0.429977
1.33455	1.04646	0.429839
1.33538	1.04645	0.429285
1.33622	1.04682	0.428813
1.33705	1.04688	0.428783
1.33788	1.04634	0.428506
1.33871	1.0452	0.427578
1.33954	1.04366	0.426872
1.34038	1.04258	0.426924
1.34121	1.04116	0.426734
1.34204	1.03984	0.42653
1.34287	1.03963	0.426976
1.3437	1.03898	0.426994
1.34453	1.03795	0.427127
1.34537	1.03668	0.426717
1.3462	1.03592	0.42569
1.34703	1.03633	0.425637
1.34786	1.03599	0.426172
1.34869	1.03515	0.426118
1.34953	1.03459	0.425658
1.35036	1.03468	0.425382
1.35119	1.0349	0.424433
1.35202	1.03427	0.42363
1.35285	1.03391	0.423934
1.35368	1.03405	0.424001
1.35452	1.03402	0.42444
1.35535	1.03462	0.424567
1.35618	1.03509	0.424392
1.35701	1.03482	0.424077
1.35784	1.03456	0.423629
1.35868	1.0342	0.423609
1.35951	1.03469	0.423717
1.36034	1.03489	0.423698
1.36117	1.03499	0.42368
1.362	1.03417	0.422896
1.36283	1.03333	0.421694
1.36367	1.03332	0.421045
1.3645	1.03285	0.420838
1.36533	1.03293	0.421022
1.36616	1.03281	0.421186
1.36699	1.03274	0.421179
1.36783	1.03222	0.4219
1.36866	1.03178	0.421984
1.36949	1.03183	0.421694
1.37032	1.03172	0.421606
1.37115	1.03104	0.422136
1.37198	1.03088	0.422282
1.37282	1.03057	0.422504
1.37365	1.03071	0.422932
1.37448	1.03018	0.422863
1.37531	1.02848	0.422378
1.37614	1.02771	0.421811
1.37698	1.0275	0.422054
1.37781	1.02676	0.42249
1.37864	1.02577	0.422788
1.37947	1.02469	0.422993
1.3803	1.02415	0.42405
1.38113	1.02545	0.424122
1.38197	1.02641	0.424453
1.3828	1.02698	0.425155
1.38363	1.02789	0.425807
1.38446	1.02795	0.42473
1.38529	1.02792	0.424037
1.38613	1.02856	0.423773
1.38696	1.02838	0.423165
1.38779	1.02815	0.423505
1.38862	1.02775	0.423262
1.38945	1.02805	0.422642
1.39028	1.02805	0.422367
1.39112	1.02771	0.421848
1.39195	1.02705	0.422201
1.39278	1.02614	0.422742
1.39361	1.02625	0.423589
1.39444	1.02666	0.423197
1.39528	1.02627	0.423377
1.39611	1.02642	0.424219
1.39694	1.02542	0.424298
1.39777	1.02506	0.423952
1.3986	1.02543	0.423829
1.39943	1.02542	0.424886
1.40027	1.02539	0.425772
1.4011	1.02493	0.425845
1.40193	1.02449	0.425863
1.40276	1.02366	0.426164
1.40359	1.02341	0.42671
1.40443	1.02362	0.426946
1.40526	1.02388	0.427003
1.40609	1.02404	0.427628
1.40692	1.02345	0.427954
1.40775	1.02335	0.427491
1.40858	1.0224	0.427312
1.40942	1.02199	0.426867
1.41025	1.02204	0.426135
1.41108	1.02159	0.426439
1.41191	1.02163	0.426607
1.41274	1.02124	0.426298
1.41358	1.02043	0.426275
1.41441	1.02001	0.425875
1.41524	1.01909	0.426101
1.41607	1.01865	0.426236
1.4169	1.01855	0.425732
1.41773	1.01798	0.426847
1.41857	1.01731	0.427946
1.4194	1.01707	0.42806
1.42023	1.01635	0.428308
1.42106	1.01588	0.4285
1.42189	1.01564	0.428102
1.42273	1.01382	0.428297
1.42356	1.01316	0.428827
1.42439	1.01338	0.429465
1.42522	1.01269	0.430008
1.42605	1.01272	0.430824
1.42688	1.01262	0.431284
1.42772	1.01222	0.431044
1.42855	1.01241	0.431459
1.42938	1.01285	0.432038
1.43021	1.01262	0.432247
1.43104	1.01228	0.431626
1.43188	1.01192	0.431823
1.43271	1.01164	0.432321
1.43354	1.01105	0.432572
1.43437	1.01095	0.432599
1.4352	1.01077	0.43276
1.43603	1.01029	0.432693
1.43687	1.01032	0.432522
1.4377	1.00976	0.431371
1.43853	1.00989	0.430552
1.43936	1.00948	0.430985
1.44019	1.00855	0.430903
1.44103	1.00772	0.429922
1.44186	1.00742	0.428653
1.44269	1.00761	0.428733
1.44352	1.00772	0.429957
1.44435	1.00784	0.429771
1.44518	1.00753	0.429294
1.44602	1.00705	0.430244
1.44685	1.00626	0.429815
1.44768	1.00585	0.429066
1.44851	1.00647	0.428541
1.44934	1.0063	0.428632
1.45017	1.00612	0.428412
1.45101	1.00632	0.428705
1.45184	1.00571	0.42882
1.45267	1.00571	0.428097
1.4535	1.00609	0.428277
1.45433	1.00628	0.428937
1.45517	1.00643	0.428755
1.456	1.00632	0.429489
1.45683	1.00707	0.429212
1.45766	1.00745	0.42825
1.45849	1.00791	0.429267
1.45932	1.00811	0.429062
1.46016	1.00833	0.427603
1.46099	1.00817	0.427273
1.46182	1.00772	0.427073
1.46265	1.00819	0.426272
1.46348	1.00807	0.426767
1.46432	1.0091	0.427298
1.46515	1.00887	0.427184
1.46598	1.00776	0.42689
1.46681	1.00687	0.426659
1.46764	1.00653	0.426268
1.46847	1.00589	0.425582
1.46931	1.00595	0.424561
1.47014	1.00605	0.423751
1.47097	1.00569	0.422707
1.4718	1.00559	0.422759
1.47263	1.00548	0.422972
1.47347	1.00591	0.422532
1.4743	1.00541	0.422197
1.47513	1.00632	0.420972
1.47596	1.00586	0.420129
1.47679	1.00573	0.419749
1.47762	1.00588	0.419176
1.47846	1.00564	0.419038
1.47929	1.00633	0.419752
1.48012	1.00581	0.42054
1.48095	1.00503	0.420487
1.48178	1.00344	0.421269
1.48262	1.00377	0.420918
1.48345	1.0038	0.42085
1.48428	1.00347	0.420963
1.48511	1.0026	0.420064
1.48594	1.00264	0.420481
1.48677	1.00336	0.420143
1.48761	1.00278	0.418538
1.48844	1.00322	0.419044
1.48927	1.00296	0.419342
1.4901	1.00263	0.419536
1.49093	1.003	0.420082
1.49177	1.0042	0.420283
1.4926	1.00414	0.420747
1.49343	1.00464	0.420584
1.49426	1.00521	0.420845
1.49509	1.00481	0.419935
1.49592	1.00492	0.419194
1.49676	1.00455	0.419157
1.49759	1.00534	0.418077
1.49842	1.00426	0.417071
1.49925	1.00335	0.417117
1.50008	1.00341	0.416418
1.50092	1.00355	0.415885
1.50175	1.00219	0.416515
1.50258	1.00217	0.416504
1.50341	1.00266	0.41616
1.50424	1.00294	0.416468
1.50507	1.00323	0.415454
1.50591	1.0027	0.414555
1.50674	1.00296	0.414042
1.50757	1.00316	0.41327
1.5084	1.00298	0.412408
1.50923	1.00225	0.412388
1.51007	1.00236	0.413006
1.5109	1.00175	0.41432
1.51173	1.00164	0.414605
1.51256	1.0013	0.415071
1.51339	1.00136	0.414242
1.51422	0.99979	0.414569
1.51506	0.999549	0.415107
1.51589	0.99949	0.415339
1.51672	0.998694	0.415334
1.51755	0.999159	0.415861
1.51838	0.999412	0.415541
1.51922	0.999407	0.415264
1.52005	1.00051	0.414956
1.52088	1.0007	0.414653
1.52171	1.0008	0.413884
1.52254	1.0015	0.413873
1.52337	1.00259	0.413001
1.52421	1.00354	0.413889
1.52504	1.0027	0.414677
1.52587	1.00282	0.414319
1.5267	1.00305	0.413932
1.52753	1.00349	0.413829
1.52837	1.00238	0.415268
1.5292	1.00246	0.416102
1.53003	1.00302	0.415235
1.53086	1.00355	0.414849
1.53169	1.00327	0.414822
1.53252	1.00308	0.414002
1.53336	1.00252	0.414004
1.53419	1.00225	0.413649
1.53502	1.00234	0.413376
1.53585	1.00155	0.413535
1.53668	1.00189	0.413103
1.53752	1.00212	0.412633
1.53835	1.00181	0.412192
1.53918	1.00135	0.412766
1.54001	1.00159	0.413376
1.54084	1.00185	0.412913
1.54167	1.00156	0.413686
1.54251	1.00094	0.414011
1.54334	1.00222	0.413552
1.54417	1.00223	0.413537
1.545	1.00169	0.413482
1.54583	1.00144	0.413209
1.54667	1.00103	0.414311
1.5475	1.00068	0.413859
1.54833	0.999796	0.413562
1.54916	0.999846	0.414369
1.54999	0.999892	0.414217
1.55082	1.00067	0.413979
1.55166	1.00086	0.414537
1.55249	1.00025	0.414333
1.55332	1.00051	0.414713
1.55415	1.00027	0.414687
1.55498	1.00052	0.415409
1.55582	1.00189	0.414335
1.55665	1.00219	0.413683
1.55748	1.00253	0.413083
1.55831	1.00286	0.413843
1.55914	1.00333	0.413726
1.55997	1.00326	0.413834
1.56081	1.00344	0.414812
1.56164	1.00246	0.415276
1.56247	1.00158	0.414771
1.5633	1.00138	0.414908
1.56413	1.00133	0.413987
1.56497	1.00067	0.415167
1.5658	0.999915	0.415164
1.56663	1.00031	0.415406
1.56746	1.00016	0.415633
1.56829	1.00067	0.416215
1.56913	1.00091	0.41579
1.56996	1.00118	0.414579
1.57079	1.00102	0.413583
1.57162	1.00078	0.414572
1.57245	1.00097	0.415248
1.57328	1.0018	0.414578
1.57412	1.00204	0.414306
1.57495	1.00125	0.413957
1.57578	1.00146	0.413818
1.57661	1.00097	0.414249
1.57744	1.00085	0.414734
1.57828	1.00073	0.41482
1.57911	1.00006	0.415709
1.57994	1.00055	0.415884
1.58077	1.0003	0.414641
1.5816	1.00011	0.414318
1.58243	0.99974	0.415214
1.58327	0.998182	0.415195
1.5841	0.9974	0.41545
1.58493	0.99669	0.415767
1.58576	0.996795	0.414975
1.58659	0.996933	0.415104
1.58743	0.997431	0.414912
1.58826	0.997458	0.41429
1.58909	0.997826	0.414312
1.58992	0.998058	0.414184
1.59075	0.997839	0.413063
1.59158	0.998073	0.413355
1.59242	0.997806	0.413869
1.59325	0.997	0.413281
1.59408	0.997858	0.413332
1.59491	0.998685	0.412101
1.59574	0.998765	0.411671
1.59658	0.998424	0.411704
1.59741	0.997945	0.41261
1.59824	0.996703	0.413219
1.59907	0.996522	0.413189
1.5999	0.996314	0.413381
1.60073	0.995822	0.41341
1.60157	0.995131	0.413478
1.6024	0.993494	0.412808
1.60323	0.993406	0.412022
1.60406	0.993722	0.411705
1.60489	0.994141	0.411022
1.60573	0.995037	0.410952
1.60656	0.996153	0.410828
1.60739	0.997286	0.410377
1.60822	0.997662	0.409307
1.60905	0.998041	0.409216
1.60988	0.998186	0.408664
1.61072	0.997636	0.40864
1.61155	0.996721	0.409109
1.61238	0.996557	0.409148
1.61321	0.995538	0.40841
1.61404	0.994425	0.40918
1.61488	0.993375	0.409477
1.61571	0.994105	0.410162
1.61654	0.995488	0.409987
1.61737	0.994736	0.410045
1.6182	0.99458	0.408982
1.61903	0.994643	0.408749
1.61987	0.99521	0.409054
1.6207	0.99528	0.408608
1.62153	0.995214	0.407959
1.62236	0.995797	0.408663
1.62319	0.99588	0.409529
1.62403	0.99647	0.40889
1.62486	0.997106	0.409235
1.62569	0.997775	0.409638
1.62652	0.998099	0.409289
1.62735	0.997878	0.409844
1.62818	0.998162	0.409712
1.62902	0.99813	0.409599
1.62985	0.998322	0.410416
1.63068	0.99813	0.410773
1.63151	0.997835	0.411196
1.63234	0.998001	0.412002
1.63318	0.998383	0.411914
1.63401	0.998954	0.410965
1.63484	0.999565	0.410952
1.63567	1.00012	0.410796
1.6365	0.999371	0.411981
1.63733	0.999991	0.412017
1.63817	1.00064	0.412173
1.639	1.0016	0.411998
1.63983	1.00259	0.411129
1.64066	1.00352	0.41145
1.64149	1.00462	0.410678
1.64233	1.00423	0.409898
1.64316	1.0044	0.409239
1.64399	1.00489	0.409102
1.64482	1.00529	0.409604
1.64565	1.00553	0.410335
1.64648	1.0058	0.410549
1.64732	1.00526	0.411117
1.64815	1.00405	0.411195
1.64898	1.00358	0.410262
1.64981	1.00337	0.410115
1.65064	1.0032	0.410213
1.65148	1.00326	0.410558
1.65231	1.00416	0.41127
1.65314	1.00484	0.411263
1.65397	1.00602	0.41117
1.6548	1.00721	0.410662
[truncated: 24,502 more rows]

## Sheet: Figure 3e
Data used for Figure
ICM	-1.42438	1.34059	0.083787
5mM EDTA	98.8689	100.377	98.6175	102.137					Experiment 1	2023-08-04
1ug/ml BSG	103.645	101.634	99.8743	101.382					ICM	-1.42438	1.34059	0.083787
75ug/ml MCT1 (batch1)	-1.32159	-0.969163	-4.49339						5mM EDTA	98.8689	100.377	98.6175	102.137
75ug/ml PMCA	4.7261	7.62621	-2.04082						10ug/ml BSG	113.448	111.94	111.94	113.448
									1ug/ml BSG	103.645	101.634	99.8743	101.382
									75ug/ml MCT1 (batch1)	-1.32159	-0.969163	-4.49339
									75ug/ml MCT1 (batch 3)	0.167224	-8.19398	-14.5485	-9.19732
									Experiment 2	2023-06-29
									5mM EDTA	102.15	100.684	98.045	99.8045	99.5112	99.8045
									ICM	4.49658	-4.59433	-0.1955	16.2268	-5.76735	-10.1662
									10ug/ml BSG	107.722	106.843	107.722
									1ug/ml BSG	61.9746	58.7488	48.4849
									75ug/ml MCT1 (batch 3)	16.5441	16.8198	19.0257
									75ug/ml PMCA	4.7261	7.62621	-2.04082
									Experiment 3	2023-06-29
									5mM EDTA	100.862	100.862	98.5625	100	100	99.7125
									ICM	9.15189	-3.21035	-4.07283	-2.06037	14.9018	-14.7101
									10ug/ml BSG	106.037	106.9	105.175
									1ug/ml BSG	63.4883	60.0383	58.0259
									75ug/ml MCT1 (batch 3)	13.1698	2.65398	5.05759
									75ug/ml PMCA	3.91823	6.64395	5.96252
									Experiment 4
									ICM	2.49	-3.48	3.48	1.09	1.69	-5.27
									5mM EDTA	100.1	100.5	100.7	98.51	100.3	99.9
									10ug/ml BSG	107.85	108.85	107.65
									1ug/ml BSG	99.5	100.1	100.3
									75ug/ml MCT1 (batch 4)	0.17	2.95	2.19
