# Supplementary material for: Erythrocyte invasion-neutralising antibodies prevent Plasmodium falciparum RH5 from binding to basigin-containing membrane protein complexes
Source: eLife. 2023 Oct 5;12:e83681. doi: 10.7554/eLife.83681 (PMC10569788; doi:10.7554/eLife.83681)
Supplement: Figure 4—source data 1. [file elife-83681-fig4-data1.xlsx]

## Sheet: Figure 4a
Percentage inhibition
Basigin Ecto domain
No mAB	R5.015	R5.011	R5.016	9AD4	R5.004
100	96.58	98	87	74	7
100	96.12	96	91	78	2.2
100	98	93	96.4	80	2.1

## Sheet: Figure 4b
Percentage inhibition
Basigin PMCA
No mAB	R5.0015	R5.0011	R5.0016	9AD4	R5.004
100	98.9	102.1	10.7	5	2.8
100	102	100	9.4	6.6	2.2
100	100	101	8.3	3.4	0.8

## Sheet: Figure 4c
Percentage inhibition
Basigin MCT1
No mAB	R5.0015	R5.0011	R5.0016	9AD4	R5.004
100	95.6	91	53.4	59	4
100	98.12	94	48.6	61	2.8
100	101	93	51.4	48	3.1
